# Supplementary material
Source: publisher figshare collection journal article supplement (https://asha.figshare.com/ndownloader/files/23711657)
Supplement: Supplementary file 1 [file 23711657]

## Sheet: Sheet1
Supplemental Material S1, Roberts et al., "Trends in Clinical Practice Research in ASHA Journals: 2008–2018," AJSLP, https://doi.org/10.1044/2020_AJSLP-19-00011
Supplemental citations
record_id	article_title	author_name	journal	year	measure	intervention	implementation	APA_citation
6b	Self-Ratings of Vocal Status in Daily Life: Reliability and Validity for Patients With Vocal Hyperfunction and a Normative Group.	Van Stan, Jarrad H.; Maffei, Marc; Vaz Masson, Maria; Mehta, Daryush D.; Burns, James A.; Hillman, Robert E.	1	2017	1			Van Stan, J. H., Maffei, M., Masson, M. L. V., Mehta, D. D., Burns, J. A., & Hillman, R. E. (2017). Self-ratings of vocal Status in daily life: Reliability and validity for patients with vocal hyperfunction and a normative group. American journal of speech-language pathology, 26(4), 1167-1177.
11b	Synthesizing Information From Language Samples and Standardized Tests in School-Age Bilingual Assessment.	Ebert, Kerry Danahy; Pham, Giang	2	2017	1			Ebert, K. D., & Pham, G. (2017). Synthesizing information from language samples and standardized tests in school-age bilingual assessment. Language, Speech, and Hearing Services in Schools, 48(1), 42-55.
17b	A Multivariate Analytic Approach to the Differential Diagnosis of Apraxia of Speech.	Basilakos, Alexandra; Yourganov, Grigori; den Ouden, Dirk-Bart; Fogerty, Daniel; Rorden, Chris; Feenaughty, Lynda; Fridriksson, Julius	0	2017	1			Basilakos, A., Yourganov, G., den Ouden, D. B., Fogerty, D., Rorden, C., Feenaughty, L., & Fridriksson, J. (2017). A multivariate analytic approach to the differential diagnosis of apraxia of speech. Journal of Speech, Language, and Hearing Research, 60(12), 3378-3392.
28b	Efficacy of a Supplemental Phonemic Awareness Curriculum to Instruct Preschoolers With Delays in Early Literacy Development.	Goldstein, Howard; Olszewski, Arnold; Haring, Christa; Greenwood, Charles R.; McCune, Luke; Carta, Judith; Atwater, Jane; Guerrero, Gabriela; Schneider, Naomi; McCarthy, Tanya; Kelley, Elizabeth S.	0	2017	0	1		Goldstein, H., Olszewski, A., Haring, C., Greenwood, C. R., McCune, L., Carta, J., ... & Kelley, E. S. (2017). Efficacy of a supplemental phonemic awareness curriculum to instruct preschoolers with delays in early literacy development. Journal of Speech, Language, and Hearing Research, 60(1), 89-103.
31b	Do the Hard Things First: A Randomized Controlled Trial Testing the Effects of Exemplar Selection on Generalization Following Therapy for Grammatical Morphology.	Van Horne, Amanda Jean Owen; Fey, Marc; Curran, Maura	0	2017	0	1		Van Horne, A. J. O., Fey, M., & Curran, M. (2017). Do the hard things first: A randomized controlled trial testing the effects of exemplar selection on generalization following therapy for grammatical morphology. Journal of Speech, Language, and Hearing Research, 60(9), 2569-2588.
33b	The Effect of Hand Gesture Cues Within the Treatment of /r/ for a College-Aged Adult With Persisting Childhood Apraxia of Speech.	Rusiewicz, Heather Leavy; Rivera, Jessica Lynch	1	2017	0	1		Rusiewicz, H. L., & Rivera, J. L. (2017). The effect of hand gesture cues within the treatment of/r/for a college-aged adult with persisting childhood apraxia of speech. American journal of speech-language pathology, 26(4), 1236-1243.
34b	Developing the Alphabetic Principle to Aid Text-Based Augmentative and Alternative Communication Use by Adults With Low Speech Intelligibility and Intellectual Disabilities.	Schmidt-Naylor, Anna C.; Saunders, Kathryn J.; Brady, Nancy C.	1	2017	0	1		Schmidt-Naylor, A. C., Saunders, K. J., & Brady, N. C. (2017). Developing the Alphabetic Principle to Aid Text-Based Augmentative and Alternative Communication Use by Adults With Low Speech Intelligibility and Intellectual Disabilities. American journal of speech-language pathology, 26(2), 397-412.
39b	Training Direct-Care Staff to Provide Communication Intervention to Adults With Intellectual Disability: A Systematic Review.	van der Meer, Larah; Matthews, Tamyra; Ogilvie, Emily; Berry, Alice; Waddington, Hannah; Balandin, Susan; O'Reilly, Mark F.; Lancioni, Giulio; Sigafoos, Jeff	1	2017	0	1		van der Meer, L., Matthews, T., Ogilvie, E., Berry, A., Waddington, H., Balandin, S., ... & Sigafoos, J. (2017). Training direct-care staff to provide communication intervention to adults with intellectual disability: A systematic review. American journal of speech-language pathology, 26(4), 1279-1295.
42b	Language Outcomes in Children Who Are Deaf and Hard of Hearing: The Role of Language Ability Before Hearing Aid Intervention.	Daub, Olivia; Bagatto, Marlene P.; Johnson, Andrew M.; Cardy, Janis Oram	0	2017	0	1		Daub, O., Bagatto, M. P., Johnson, A. M., & Cardy, J. O. (2017). Language outcomes in children who are deaf and hard of hearing: The role of language ability before hearing aid intervention. Journal of Speech, Language, and Hearing Research, 60(11), 3310-3320.
46b	Self-Rated Communication-Related Quality of Life of Individuals With Oromandibular Dystonia Receiving Botulinum Toxin Injections.	Page, Allyson D.; Siegel, Lauren; Jog, Mandar	1	2017	0	1		Page, A. D., Siegel, L., & Jog, M. (2017). Self-rated communication-related quality of life of individuals with oromandibular dystonia receiving botulinum toxin injections. American journal of speech-language pathology, 26(2S), 674-681.
55b	Beyond Sentences: Using the Expression, Reception, and Recall of Narratives Instrument to Assess Communication in School-Aged Children With Autism Spectrum Disorder.	Volden, Joanne; Dodd, Erin; Engel, Kathleen; Smith, Isabel M.; Szatmari, Peter; Fombonne, Eric; Zwaigenbaum, Lonnie; Mirenda, Pat; Bryson, Susan; Roberts, Wendy; Vaillancourt, Tracy; Waddell, Charlotte; Elsabbagh, Mayada; Bennett, Teresa; Georgiades, Stelios; Duku, Eric	0	2017	1			Volden, J., Dodd, E., Engel, K., Smith, I. M., Szatmari, P., Fombonne, E., ... & Vaillancourt, T. (2017). Beyond sentences: using the expression, reception, and recall of narratives instrument to assess communication in school-aged children with autism spectrum disorder. Journal of Speech, Language, and Hearing Research, 60(8), 2228-2240.
56b	Effects of Tongue Strength Training on Mealtime Function in Long-Term Care.	Namasivayam-MacDonald, Ashwini M.; Burnett, Lynsey; Nagy, Ahmed; Waito, Ashley A.; Steele, Catriona M.	1	2017	0	1		Namasivayam-MacDonald, A. M., Burnett, L., Nagy, A., Waito, A. A., & Steele, C. M. (2017). Effects of tongue strength training on mealtime function in long-term care. American journal of speech-language pathology, 26(4), 1213-1224.
57b	Variable Practice to Enhance Speech Learning in Ultrasound Biofeedback Treatment for Childhood Apraxia of Speech: A Single Case Experimental Study.	Preston, Jonathan L.; Leece, Megan C.; McNamara, Kerry; Maas, Edwin	1	2017	0	1		Preston, J. L., Leece, M. C., McNamara, K., & Maas, E. (2017). Variable practice to enhance speech learning in ultrasound biofeedback treatment for childhood apraxia of speech: A single case experimental study. American Journal of Speech-Language Pathology, 26(3), 840-852.
58b	Teaching Transnasal Endoscopy to Graduate Students Without a Hospital or Simulation Laboratory: Pool Noodles and Cadavers.	Salzhauer Berkowitz, Shari	1	2017	0	1		Berkowitz, S. S. (2017). Teaching Transnasal Endoscopy to Graduate Students Without a Hospital or Simulation Laboratory: Pool Noodles and Cadavers. American journal of speech-language pathology, 26(3), 709-715.
71b	The Effects of Enhanced Milieu Teaching With Phonological Emphasis on the Speech and Language Skills of Young Children With Cleft Palate: A Pilot Study.	Kaiser, Ann P.; Scherer, Nancy J.; Frey, Jennifer R.; Roberts, Megan Y.	1	2017	0	1		Kaiser, A. P., Scherer, N. J., Frey, J. R., & Roberts, M. Y. (2017). The effects of enhanced milieu teaching with phonological emphasis on the speech and language skills of young children with cleft palate: A pilot study. American journal of speech-language pathology, 26(3), 806-818.
77b	Applying Item Response Theory to the Development of a Screening Adaptation of the Goldman-Fristoe Test of Articulation-Second Edition.	Brackenbury, Tim; Zickar, Michael J.; Munson, Benjamin; Storkel, Holly L.	0	2017	1			Brackenbury, T., Zickar, M. J., Munson, B., & Storkel, H. L. (2017). Applying item response theory to the development of a screening adaptation of the Goldman-Fristoe Test of Articulation–Second Edition. Journal of Speech, Language, and Hearing Research, 60(9), 2672-2679.
95b	The German Focus on the Outcomes of Communication Under Six (FOCUS-G): Reliability and Validity of a Novel Assessment of Communicative Participation.	Neumann, Sandra; Salm, Sandra; Rietz, Christian; Stenneken, Prisca	0	2017	1			Neumann, S., Salm, S., Rietz, C., & Stenneken, P. (2017). The German Focus on the Outcomes of Communication Under Six (FOCUS-G): Reliability and validity of a novel assessment of communicative participation. Journal of Speech, Language, and Hearing Research, 60(3), 675-681.
96b	A Clinical Evaluation of the Competing Sources of Input Hypothesis.	Fey, Marc E.; Leonard, Laurence B.; Bredin-Oj, Shelley L.; Deevy, Patricia	0	2017	0	1		Fey, M. E., Leonard, L. B., Bredin-Oja, S. L., & Deevy, P. (2017). A clinical evaluation of the competing sources of input hypothesis. Journal of Speech, Language, and Hearing Research, 60(1), 104-120.
111b	Acoustic and Perceptual Consequences of Speech Cues for Children With Dysarthria.	Levy, Erika S.; Chang, Younghwa M.; Ancelle, Josephine A.; McAuliffe, Megan J.	0	2017	0	1		Levy, E. S., Chang, Y. M., Ancelle, J. A., & McAuliffe, M. J. (2017). Acoustic and perceptual consequences of speech cues for children with dysarthria. Journal of Speech, Language, and Hearing Research, 60(6S), 1766-1779.
118b	With Some Help From Others' Hands: Iconic Gesture Helps Semantic Learning in Children With Specific Language Impairment.	Vogt, Susanne S.; Kauschke, Christina	0	2017	0	1		Vogt, S. S., & Kauschke, C. (2017). With some help from others' hands: Iconic gesture helps semantic learning in children with specific language impairment. Journal of Speech, Language, and Hearing Research, 60(11), 3213-3225.
125b	Gauging the Auditory Dimensions of Dysarthric Impairment: Reliability and Construct Validity of the Bogenhausen Dysarthria Scales (BoDyS).	Ziegler, Wolfram; Staiger, Anja; Scholderle, Theresa; Vogel, Mathias	0	2017	1			Ziegler, W., Staiger, A., Schölderle, T., & Vogel, M. (2017). Gauging the auditory dimensions of dysarthric impairment: reliability and construct validity of the Bogenhausen Dysarthria Scales (BoDyS). Journal of Speech, Language, and Hearing Research, 60(6), 1516-1534.
128b	A Systematic Review of Isometric Lingual Strength-Training Programs in Adults With and Without Dysphagia.	McKenna, Victoria S.; Bin Zhang; Haines, Morgan B.; Kelchner, Lisa N.	1	2017	0	1		McKenna, V. S., Zhang, B., Haines, M. B., & Kelchner, L. N. (2017). A systematic review of isometric lingual strength-training programs in adults with and without dysphagia. American journal of speech-language pathology, 26(2), 524-539.
136b	Characterization of Vocal Fold Vibration in Sulcus Vocalis Using High-Speed Digital Imaging.	Akihito Yamauchi; Hisayuki Yokonishi; Hiroshi Imagawa; Ken-Ichi Sakakibara; Takaharu Nito; Niro Tayama; Tatsuya Yamasoba	0	2017	1			Yamauchi, A., Yokonishi, H., Imagawa, H., Sakakibara, K. I., Nito, T., Tayama, N., & Yamasoba, T. (2017). Characterization of vocal fold vibration in sulcus vocalis using high-speed digital imaging. Journal of Speech, Language, and Hearing Research, 60(1), 24-37.
147b	The Impact of Expiratory Muscle Strength Training on Speech Breathing in Individuals With Parkinson's Disease: A Preliminary Study.	Darling-White, Meghan; Huber, Jessica E.	1	2017	0	1		Darling-White, M., & Huber, J. E. (2017). The impact of expiratory muscle strength training on speech breathing in individuals with Parkinson's disease: A preliminary study. American journal of speech-language pathology, 26(4), 1159-1166.
153b	Cluster-Randomized Controlled Trial Evaluating the Effectiveness of Computer-Assisted Intervention Delivered by Educators for Children With Speech Sound Disorders.	McLeod, Sharynne; Baker, Elise; McCormack, Jane; Wren, Yvonne; Roulstone, Sue; Crow, Kathryn; Masso, Sarah; Whit, Paul; Howland, Charlotte	0	2017	0	1		McLeod, S., Baker, E., McCormack, J., Wren, Y., Roulstone, S., Crowe, K., ... & Howland, C. (2017). Cluster-randomized controlled trial evaluating the effectiveness of computer-assisted intervention delivered by educators for children with speech sound disorders. Journal of Speech, Language, and Hearing Research, 60(7), 1891-1910.
154b	Measuring Clinician-Client Relationships in Speech-Language Treatment for School-Age Children.	Ebert, Kerry Danahy	1	2017	1	0		Ebert, K. D. (2017). Measuring clinician–client relationships in speech-language treatment for school-age children. American journal of speech-language pathology, 26(1), 146-152.
162b	Speech Inconsistency in Children With Childhood Apraxia of Speech, Language Impairment, and Speech Delay: Depends on the Stimuli.	Iuzzini-Seigel, Jenya; Hogan, Tiffany P.; Green, Jordan R.	0	2017	1			Iuzzini-Seigel, J., Hogan, T. P., & Green, J. R. (2017). Speech inconsistency in children with childhood apraxia of speech, language impairment, and speech delay: Depends on the stimuli. Journal of Speech, Language, and Hearing Research, 60(5), 1194-1210.
175b	Interactive Book Reading to Accelerate Word Learning by Kindergarten Children With Specific Language Impairment: Identifying Adequate Progress and Successful Learning Patterns.	Storkel, Holly L.; Komesidou, Rouzana; Fleming, Kandace K.; Swinburne Romine, Rebecca	2	2017	0	1		Storkel, H. L., Komesidou, R., Fleming, K. K., & Romine, R. S. (2017). Interactive book reading to accelerate word learning by kindergarten children with specific language impairment: Identifying adequate progress and successful learning patterns. Language, speech, and hearing services in schools, 48(2), 108-124.
189b	A Clear Speech Approach to Accent Management.	Behrman, Alison	1	2017	0	1		Behrman, A. (2017). A clear speech approach to accent management. American Journal of Speech-Language Pathology, 26(4), 1178-1192.
190b	Recovery of Online Sentence Processing in Aphasia: Eye Movement Changes Resulting From Treatment of Underlying Forms.	Mack, Jennifer E.; Thompson, Cynthia K.	0	2017	0	1		Mack, J. E., & Thompson, C. K. (2017). Recovery of online sentence processing in aphasia: eye movement changes resulting from Treatment of Underlying Forms. Journal of Speech, Language, and Hearing Research, 60(5), 1299-1315.
195b	Speech Situation Checklist-Revised: Investigation With Adults Who Do Not Stutter and Treatment-Seeking Adults Who Stutter.	Vanryckeghem, Martine; Matthews, Michael; Xu, Peixin	1	2017	1			Vanryckeghem, M., Matthews, M., & Xu, P. (2017). Speech Situation Checklist–Revised: Investigation With Adults Who Do Not Stutter and Treatment-Seeking Adults Who Stutter. American Journal of Speech-Language Pathology, 26(4), 1129-1140.
198b	A Diagnostic Marker to Discriminate Childhood Apraxia of Speech From Speech Delay: II. Validity Studies of the Pause Marker.	Shriberg, Lawrence D.; Strand, Edythe A.; Fourakis, Marios; Jakielski, Kathy J.; Hall, Sheryl D.; Karlsson, Heather B.; Mabie, Heather L.; McSweeny, Jane L.; Tilkens, Christie M.; Wilson, David L.	0	2017	1			Shriberg, L. D., Strand, E. A., Fourakis, M., Jakielski, K. J., Hall, S. D., Karlsson, H. B., ... & Wilson, D. L. (2017). A diagnostic marker to discriminate childhood apraxia of speech from speech delay: II. Validity studies of the Pause Marker. Journal of Speech, Language, and Hearing Research, 60(4), S1118-S1134.
200b	Effects of a Least-to-Most Prompting Procedure on Multisymbol Message Production in Children With Autism Spectrum Disorder Who Use Augmentative and Alternative Communication.	Finke, Erinn H.; Davis, Jennifer M.; Benedict, Morgan; Goga, Lauren; Kelly, Jennifer; Palumbo, Lauren; Peart, Tanika; Waters, Samantha	1	2017	0	1		Finke, E. H., Davis, J. M., Benedict, M., Goga, L., Kelly, J., Palumbo, L., ... & Waters, S. (2017). Effects of a least-to-most prompting procedure on multisymbol message production in children with autism spectrum disorder who use augmentative and alternative communication. American journal of speech-language pathology, 26(1), 81-98.
207b	Perceptually Salient Sound Distortions and Apraxia of Speech: A Performance Continuum.	Haley, Katarina L.; Jacks, Adam; Richardson, Jessica D.; Wambaugh, Julie L.	1	2017	1			Haley, K. L., Jacks, A., Richardson, J. D., & Wambaugh, J. L. (2017). Perceptually salient sound distortions and apraxia of speech: A performance continuum. American Journal of Speech-Language Pathology, 26(2S), 631-640.
211b	Effects of Blocked and Random Practice Schedule on Outcomes of Sound Production Treatment for Acquired Apraxia of Speech: Results of a Group Investigation.	Wambaugh, Julie L.; Nessler, Christina; Wright, Sandra; Mauszycki, Shannon C.; DeLong, Catharine; Berggren, Kiera; Bailey, Dallin J.	0	2017	0	1		Wambaugh, J. L., Nessler, C., Wright, S., Mauszycki, S. C., DeLong, C., Berggren, K., & Bailey, D. J. (2017). Effects of blocked and random practice schedule on outcomes of Sound Production Treatment for acquired apraxia of speech: Results of a group investigation. Journal of Speech, Language, and Hearing Research, 60(6S), 1739-1751.
217b	Shortened Nonword Repetition Task (NWR-S): A Simple, Quick, and Less Expensive Outcome to Identify Children With Combined Specific Language and Reading Impairment.	le Clercq, Carlijn M. P.; van der Schroeff, Marc P.; Rispens, Judith E.; Ruytjens, Liesbet; Goedegebure, Andre; van Ingen, Gijs; Franken, Marie-Christine	0	2017	1			le Clercq, C. M., van der Schroeff, M. P., Rispens, J. E., Ruytjens, L., Goedegebure, A., Van Ingen, G., & Franken, M. C. (2017). Shortened Nonword Repetition Task (NWR-S): A Simple, Quick, and Less Expensive Outcome to Identify Children With Combined Specific Language and Reading Impairment. Journal of Speech, Language, and Hearing Research, 60(8), 2241-2248.
219b	Current Methods of Evaluating Speech- Language Outcomes for Preschoolers With Communication Disorders: A Scoping Review Using the ICF-CY.	Cunningham, Barbara Jane; Washington, Karla N.; Binns, Amanda; Rolfe, Katelyn; Robertson, Bernadette; Rosenbaum, Peter	0	2017	1	0		Cunningham, B. J., Washington, K. N., Binns, A., Rolfe, K., Robertson, B., & Rosenbaum, P. (2017). Current methods of evaluating speech-language outcomes for preschoolers with communication disorders: A scoping review using the ICF-CY. Journal of Speech, Language, and Hearing Research, 60(2), 447-464.
240b	Modeling Alphabet Skills as Instructive Feedback Within a Phonological Awareness Intervention.	Olszewski, Arnold; Soto, Xigrid; Goldstein, Howard	1	2017	0	1		Olszewski, A., Soto, X., & Goldstein, H. (2017). Modeling alphabet skills as instructive feedback within a phonological awareness intervention. American journal of speech-language pathology, 26(3), 769-790.
241b	Effect of Single-Use, Laser-Cut, Slow-Flow Nipples on Respiration and Milk Ingestion in Preterm Infants.	McGrattan, Katlyn E.; McFarland, David H.; Dean, Jesse C.; Hill, Elizabeth; White, David R.; Martin-Harris, Bonnie	1	2017	0	1		McGrattan, K. E., McFarland, D. H., Dean, J. C., Hill, E., White, D. R., & Martin-Harris, B. (2017). Effect of single-use, laser-cut, slow-flow nipples on respiration and milk ingestion in preterm infants. American journal of speech-language pathology, 26(3), 832-839.
244b	Accentuate the Negative: Grammatical Errors During Narrative Production as a Clinical Marker of Central Nervous System Abnormality in School-Aged Children With Fetal Alcohol Spectrum Disorders.	Thorne, John C.	0	2017	1			Thorne, J. C. (2017). Accentuate the negative: Grammatical errors during narrative production as a clinical marker of central nervous system abnormality in school-aged children with fetal alcohol spectrum disorders. Journal of Speech, Language, and Hearing Research, 60(12), 3523-3537.
246b	Assessing the Amount of Spontaneous Real-World Spoken Language in Aphasia: Validation of Two Methods.	Haddad, Michelle M.; Taub, Edward; Uswatte, Gitendra; Johnson, Margaret L.; Mark, Victor W.; Barghi, Ameen; Byrom, Ezekiel; Xiaohua Zhou; Rodriguez, Christina M.	1	2017	1			Haddad, M. M., Taub, E., Uswatte, G., Johnson, M. L., Mark, V. W., Barghi, A., ... & Rodriguez, C. M. (2017). Assessing the amount of spontaneous real-world spoken language in aphasia: validation of two methods. American journal of speech-language pathology, 26(2), 316-326.
249b	Efficacy of Electropalatography for Treating Misarticulation of /r/.	Hitchcock, Elaine R.; Byun, Tara McAllister; Swartz, Michelle; Lazarusa, Roberta	1	2017	0	1		Hitchcock, E. R., Byun, T. M., Swartz, M., & Lazarus, R. (2017). Efficacy of electropalatography for treating misarticulation of/r. American journal of speech-language pathology, 26(4), 1141-1158.
257b	The Effect of Visual Variability on the Learning of Academic Concepts.	Bourgoyne, Ashley; Alt, Mary	0	2017	0	1		Bourgoyne, A., & Alt, M. (2017). The effect of visual variability on the learning of academic concepts. Journal of Speech, Language, and Hearing Research, 60(6), 1568-1576.
258b	Identification of Swallowing Tasks From a Modified Barium Swallow Study That Optimize the Detection of Physiological Impairment.	Hazelwood, R. Jordan; Armeson, Kent E.; Hill, Elizabeth G.; Bonilha, Heather Shaw; Martin-Harris, Bonnie	0	2017	1			Jordan Hazelwood, R., Armeson, K. E., Hill, E. G., Bonilha, H. S., & Martin-Harris, B. (2017). Identification of swallowing tasks from a modified barium swallow study that optimize the detection of physiological impairment. Journal of Speech, Language, and Hearing Research, 60(7), 1855-1863.
261b	Does Naming Therapy Make Ordering in a Restaurant Easier? Dynamics of Co-Occurring Change in Cognitive-Linguistic and Functional Communication Skills in Aphasia.	Meier, Erin L.; Johnson, Jeffrey P.; Villard, Sarah; Kiran, Swathi	1	2017	0	1		Meier, E. L., Johnson, J. P., Villard, S., & Kiran, S. (2017). Does naming therapy make ordering in a restaurant easier? Dynamics of co-occurring change in cognitive-linguistic and functional communication skills in aphasia. American journal of speech-language pathology, 26(2), 266-280.
264b	Voice-Related Patient-Reported Outcome Measures: A Systematic Review of Instrument Development and Validation.	Francis, David O.; Daniero, James J.; Hovis, Kristen L.; Sathe, Nila; Jacobson, Barbara; Penson, David F.; Feurer, Irene D.; McPheeters, Melissa L.	0	2017	1			Francis, D. O., Daniero, J. J., Hovis, K. L., Sathe, N., Jacobson, B., Penson, D. F., ... & McPheeters, M. L. (2017). Voice-related patient-reported outcome measures: a systematic review of instrument development and validation. Journal of Speech, Language, and Hearing Research, 60(1), 62-88.
265b	Trans Male Voice in the First Year of Testosterone Therapy: Make No Assumptions.	Hancock, Adrienne B.; Childs, Kayla D.; Irwig, Michael S.	0	2017	0	1		Hancock, A. B., Childs, K. D., & Irwig, M. S. (2017). Trans male voice in the first year of testosterone therapy: make no assumptions. Journal of Speech, Language, and Hearing Research, 60(9), 2472-2482.
266b	The Potential of Past Tense Marking in Oral Reading as a Clinical Marker of Specific Language Impairment in School-Age Children.	Werfel, Krystal L.; Hendricks, Alison Eisel; Schuele, C. Melanie	0	2017	1			Werfel, K. L., Hendricks, A. E., & Schuele, C. M. (2017). The potential of past tense marking in oral reading as a clinical marker of specific language impairment in school-age children. Journal of Speech, Language, and Hearing Research, 60(12), 3561-3572.
267b	Quantification and Systematic Characterization of Stuttering-Like Disfluencies in Acquired Apraxia of Speech.	Bailey, Dallin J.; Blomgren, Michael; DeLong, Catharine; Berggren, Kiera; Wambaugh, Julie L.	1	2017	1	0		Bailey, D. J., Blomgren, M., DeLong, C., Berggren, K., & Wambaugh, J. L. (2017). Quantification and systematic characterization of stuttering-like disfluencies in acquired apraxia of speech. American Journal of Speech-Language Pathology, 26(2S), 641-648.
273b	Influence of Cognitive Ability on Therapy Outcomes for Anomia in Adults With Chronic Poststroke Aphasia.	Dignam, Jade; Copland, David; O'Brien, Kate; Burfein, Penni; Khan, Asaduzzaman; Rodriguez, Amy D.	0	2017	0	1		Dignam, J., Copland, D., O'Brien, K., Burfein, P., Khan, A., & Rodriguez, A. D. (2017). Influence of cognitive ability on therapy outcomes for anomia in adults with chronic poststroke aphasia. Journal of Speech, Language, and Hearing Research, 60(2), 406-421.
275b	Assessing Vowel Centralization in Dysarthria: A Comparison of Methods.	Fletcher, Annalise R.; McAuliffe, Megan J.; Lansford, Kaitlin L.; Liss, Julie M.	0	2017	1	0		Fletcher, A. R., McAuliffe, M. J., Lansford, K. L., & Liss, J. M. (2017). Assessing vowel centralization in dysarthria: A comparison of methods. Journal of Speech, Language, and Hearing Research, 60(2), 341-354.
277b	Identifying Children at Risk for Language Impairment or Dyslexia With Group-Administered Measures.	Adlof, Suzanne M.; Scoggins, Joanna; Brazendale, Allison; Babb, Spencer; Petscher, Yaacov	0	2017	1	0		Adlof, S. M., Scoggins, J., Brazendale, A., Babb, S., & Petscher, Y. (2017). Identifying children at risk for language impairment or dyslexia with group-administered measures. Journal of Speech, Language, and Hearing Research, 60(12), 3507-3522.
280b	Influence of Linguistic and Nonlinguistic Variables on Generalization and Maintenance Following Phonomotor Treatment for Aphasia.	Pompon, Rebecca Hunting; Bislick, Lauren; Elliott, Kristen; Madden, Elizabeth Brookshire; Minkina, Irene; Oelke, Megan; Kendalla, Diane	1	2017	0	1		Pompon, R. H., Bislick, L., Elliott, K., Madden, E. B., Minkina, I., Oelke, M., & Kendall, D. (2017). Influence of linguistic and nonlinguistic variables on generalization and maintenance following phonomotor treatment for aphasia. American journal of speech-language pathology, 26(4), 1092-1104.
281b	Intrajudge and Interjudge Reliability of the Stuttering Severity Instrument-Fourth Edition.	Davidow, Jason H.; Scott, Kathleen A.	1	2017	1	0		Davidow, J. H., & Scott, K. A. (2017). Intrajudge and Interjudge Reliability of the Stuttering Severity Instrument–Fourth Edition. American journal of speech-language pathology, 26(4), 1105-1119.
289b	Stimulus Characteristics of Single-Word Tests of Children's Speech Sound Production.	Macrae, Toby	2	2017	1	0		Macrae, T. (2017). Stimulus characteristics of single-word tests of children's speech sound production. Language, Speech, and Hearing Services in Schools, 48(4), 219-233.
305b	Moving Triadic Gaze Intervention Into Practice: Measuring Clinician Attitude and Implementation Fidelity.	Feuerstein, Julie; Olswang, Lesley B.; Greenslade, Kathryn; Pinder, Gay Lloyd; Dowden, Patricia; Madden, Jodi	0	2017	0	0	1	Feuerstein, J., Olswang, L. B., Greenslade, K., Pinder, G. L., Dowden, P., & Madden, J. (2017). Moving triadic gaze intervention into practice: Measuring clinician attitude and implementation fidelity. Journal of Speech, Language, and Hearing Research, 60(5), 1285-1298.
318b	Language Samples From Children Who Use Speech-Generating Devices: Making Sense of Small Samples and Utterance Length.	Kovacs, Thomas; Hill, Katya	1	2017	1	0		Kovacs, T., & Hill, K. (2017). Language samples from children who use speech-generating devices: Making sense of small samples and utterance length. American journal of speech-language pathology, 26(3), 939-950.
319b	Impact of Performance Feedback in Family-Centered and Culturally Responsive Interview Instruction.	Brown, Jennifer A.	1	2017	0	1		Brown, J. A. (2017). Impact of Performance Feedback in Family-Centered and Culturally Responsive Interview Instruction. American journal of speech-language pathology, 26(4), 1244-1253.
322b	Efficacy of Visual-Acoustic Biofeedback Intervention for Residual Rhotic Errors: A Single-Subject Randomization Study.	McAllister Byun, Tara	0	2017	0	1		McAllister Byun, T. (2017). Efficacy of visual–acoustic biofeedback intervention for residual rhotic errors: A single-subject randomization study. Journal of Speech, Language, and Hearing Research, 60(5), 1175-1193.
327b	Training Peer Partners to Use a Speech-Generating Device With Classmates With Autism Spectrum Disorder: Exploring Communication Outcomes Across Preschool Contexts.	Thiemann-Bourque, Kathy S.; McGuff, Sara; Goldstein, Howard	0	2017	0	1		Thiemann-Bourque, K. S., McGuff, S., & Goldstein, H. (2017). Training peer partners to use a speech-generating device with classmates with autism spectrum disorder: Exploring communication outcomes across preschool contexts. Journal of Speech, Language, and Hearing Research, 60(9), 2648-2662.
333b	Language Sample Analysis and Elicitation Technique Effects in Bilingual Children With and Without Language Impairment.	Kapantzoglou, Maria; Fergadiotis, Gerasimos; Restrepo, M. Adelaida	0	2017	1	0		Kapantzoglou, M., Fergadiotis, G., & Restrepo, M. A. (2017). Language sample analysis and elicitation technique effects in bilingual children with and without language impairment. Journal of Speech, Language, and Hearing Research, 60(10), 2852-2864.
335b	Distributed Training Enhances Implicit Sequence Acquisition in Children With Specific Language Impairment.	Desmottes, Lise; Meulemans, Thierry; Patinec, Marie-Aude; Maillart, Christelle	0	2017	0	1		Desmottes, L., Meulemans, T., Patinec, M. A., & Maillart, C. (2017). Distributed training enhances implicit sequence acquisition in children with specific language impairment. Journal of Speech, Language, and Hearing Research, 60(9), 2636-2647.
339b	Observed and Parent-Report Measures of Social Communication in Toddlers With and Without Autism Spectrum Disorder Across Race/Ethnicity.	Stronach, Sheri T.; Wetherby, Amy M.	1	2017	1	0		Stronach, S. T., & Wetherby, A. M. (2017). Observed and parent-report measures of social communication in toddlers with and without autism spectrum disorder across race/ethnicity. American journal of speech-language pathology, 26(2), 355-368.
341b	Academic Vocabulary Learning in First Through Third Grade in Low-Income Schools: Effects of Automated Supplemental Instruction.	Goldstein, Howard; Ziolkowski, Robyn A.; Bojczyk, Kathryn E.; Marty, Ana; Schneider, Naomi; Harpring, Jayme; Haring, Christa D.	0	2017	0	1		Goldstein, H., Ziolkowski, R. A., Bojczyk, K. E., Marty, A., Schneider, N., Harpring, J., & Haring, C. D. (2017). Academic vocabulary learning in first through third grade in low-income schools: Effects of automated supplemental instruction. Journal of Speech, Language, and Hearing Research, 60(11), 3237-3258.
343b	Dynamic Assessment of Narratives: Efficient, Accurate Identification of Language Impairment in Bilingual Students.	Petersen, Douglas B.; Chanthongthip, Helen; Ukrainetz, Teresa A.; Spencer, Trina D.; Steeve, Roger W.	0	2017	1	0		Petersen, D. B., Chanthongthip, H., Ukrainetz, T. A., Spencer, T. D., & Steeve, R. W. (2017). Dynamic assessment of narratives: Efficient, accurate identification of language impairment in bilingual students. Journal of Speech, Language, and Hearing Research, 60(4), 983-998.
344b	Early Sentence Productions of 3- and 4-Year-Old Children Who Use Augmentative and Alternative Communication.	Binger, Cathy; Kent-Walsh, Jennifer; King, Marika; Mansfield, Lindsay	0	2017	0	1		Binger, C., Kent-Walsh, J., King, M., & Mansfield, L. (2017). Early sentence productions of 3-and 4-year-old children who use augmentative and alternative communication. Journal of Speech, Language, and Hearing Research, 60(7), 1930-1945.
346b	The Effects of Parent-Focused Slow Relaxed Speech Intervention on Articulation Rate, Response Time Latency, and Fluency in Preschool Children Who Stutter.	Sawyer, Jean; Matteson, Colleen; Hua Ou; Takahisa Nagase	0	2017	0	1		Sawyer, J., Matteson, C., Ou, H., & Nagase, T. (2017). The effects of parent-focused slow relaxed speech intervention on articulation rate, response time latency, and fluency in preschool children who stutter. Journal of Speech, Language, and Hearing Research, 60(4), 794-809.
356b	Interactive Book Reading to Accelerate Word Learning by Kindergarten Children With Specific Language Impairment: Identifying an Adequate Intensity and Variation in Treatment Response.	Storkel, Holly L.; Voelmle, Krista; Fierro, Veronica; Flake, Kelsey; Fleming, Kandace K.; Rominea, Rebecca Swinburne	2	2017	0	1		Storkel, H. L., Komesidou, R., Fleming, K. K., & Romine, R. S. (2017). Interactive book reading to accelerate word learning by kindergarten children with specific language impairment: Identifying adequate progress and successful learning patterns. Language, speech, and hearing services in schools, 48(2), 108-124.
366b	Effects of a Conversation-Based Intervention on the Linguistic Skills of Children With Motor Speech Disorders Who Use Augmentative and Alternative Communication.	Sotoa, Gloria; Clarke, Michael T.	0	2017	0	1		Soto, G., & Clarke, M. T. (2017). Effects of a conversation-based intervention on the linguistic skills of children with motor speech disorders who use augmentative and alternative communication. Journal of Speech, Language, and Hearing Research, 60(7), 1980-1998.
373b	A Diagnostic Marker to Discriminate Childhood Apraxia of Speech From Speech Delay: IV. The Pause Marker Index.	Shriberg, Lawrence D.; Strand, Edythe A.; Fourakis, Marios; Jakielski, Kathy J.; Hall, Sheryl D.; Karlsson, Heather B.; Mabie, Heather L.; McSweeny, Jane L.; Tilkens, Christie M.; Wilson, David L.	0	2017	1	0		Shriberg, L. D., Strand, E. A., Fourakis, M., Jakielski, K. J., Hall, S. D., Karlsson, H. B., ... & Wilson, D. L. (2017). A diagnostic marker to discriminate childhood apraxia of speech from speech delay: IV. The Pause Marker Index. Journal of Speech, Language, and Hearing Research, 60(4), S1153-S1169.
380b	Sentence-Level Movements in Parkinson's Disease: Loud, Clear, and Slow Speech.	Kearney, Elaine; Giles, Renuka; Haworth, Brandon; Faloutsos, Petros; Baljko, Melanie; Yunusova, Yana	0	2017	0	1		Kearney, E., Giles, R., Haworth, B., Faloutsos, P., Baljko, M., & Yunusova, Y. (2017). Sentence-level movements in Parkinson's disease: Loud, clear, and slow speech. Journal of Speech, Language, and Hearing Research, 60(12), 3426-3440.
381b	Automated Assessment of Child Vocalization Development Using LENA.	Richards, Jeffrey A.; Dongxin Xu; Gilkerson, Jill; Yapanel, Umit; Gray, Sharmistha; Paul, Terrance	0	2017	1	0		Richards, J. A., Xu, D., Gilkerson, J., Yapanel, U., Gray, S., & Paul, T. (2017). Automated assessment of child vocalization development using LENA. Journal of Speech, Language, and Hearing Research, 60(7), 2047-2063.
391b	Language Assessment With Children Who Speak Nonmainstream Dialects: Examining the Effects of Scoring Modifications in Norm-Referenced Assessment.	Hendricks, Alison Eisel; Adlof, Suzanne M.	2	2017	1	0		Hendricks, A. E., & Adlof, S. M. (2017). Language assessment with children who speak nonmainstream dialects: Examining the effects of scoring modifications in norm-referenced assessment. Language, Speech, and Hearing Services in Schools, 48(3), 168-182.
393b	Evaluating the Impact of a Multistrategy Inference Intervention for Middle-Grade Struggling Readers.	Barth, Amy E.; Elleman, Amy	2	2017	0	1		Barth, A. E., & Elleman, A. (2017). Evaluating the impact of a multistrategy inference intervention for middle-grade struggling readers. Language, speech, and hearing services in schools, 48(1), 31-41.
395b	Longitudinal Impacts of Print-Focused Read-Alouds for Children With Language Impairment.	Justice, Laura M.; Logan, Jessica; Kaderavek, Joan N.	1	2017	0	1		Justice, L. M., Logan, J., & Kaderavek, J. N. (2017). Longitudinal impacts of print-focused read-alouds for children with language impairment. American Journal of Speech-Language Pathology, 26(2), 383-396.
408b	Research to Establish the Validity, Reliability, and Clinical Utility of a Comprehensive Language Assessment of Mandarin.	Liu, Xueman Lucy; de Villiers, Jill; Chunyan Ning; Rolfhus, Eric; Hutchings, Teresa; Lee, Wendy; Jiang, Fan; Yi Wen Zhang	0	2017	1	0		Liu, X. L., de Villiers, J., Ning, C., Rolfhus, E., Hutchings, T., Lee, W., ... & Zhang, Y. W. (2017). Research to establish the validity, reliability, and clinical utility of a comprehensive language assessment of Mandarin. Journal of Speech, Language, and Hearing Research, 60(3), 592-606.
415b	A Brief Version of the Unhelpful Thoughts and Beliefs About Stuttering Scales: The UTBAS-6.	Iverach, Lisa; Heard, Rob; Menzies, Ross; Lowe, Robyn; O'Brian, Sue; Packman, Ann; Onslow, Mark	0	2016	1	0		Iverach, L., Heard, R., Menzies, R., Lowe, R., O'Brian, S., Packman, A., & Onslow, M. (2016). A brief version of the Unhelpful Thoughts and Beliefs About Stuttering scales: The UTBAS-6. Journal of Speech, Language, and Hearing Research, 59(5), 964-972.
416b	Language Sampling for Preschoolers With Severe Speech Impairments.	Binger, Cathy; Ragsdale, Jamie; Bustos, Aimee	1	2016	1	0		Binger, C., Ragsdale, J., & Bustos, A. (2016). Language sampling for preschoolers with severe speech impairments. American Journal of Speech-Language Pathology, 25(4), 493-507.
419b	An Item Analysis of the French Version of the Test for Reception of Grammar Among Children and Adolescents With Down Syndrome or Intellectual Disability of Undifferentiated Etiology.	Facon, Bruno; Magis, David	0	2016	1	0		Facon, B., & Magis, D. (2016). An item analysis of the French version of the Test for Reception of Grammar among children and adolescents with Down syndrome or intellectual disability of undifferentiated etiology. Journal of Speech, Language, and Hearing Research, 59(5), 1190-1197.
425b	Validating the Use of D for Measuring Lexical Diversity in Low-Income Kindergarten Children.	Lai, Stephanie A.; Schwanenflugel, Paula J.	2	2016	1	0		Lai, S. A., & Schwanenflugel, P. J. (2016). Validating the use of D for measuring lexical diversity in low-income Kindergarten children. Language, Speech, and Hearing Services in Schools, 47(3), 225-235.
432b	Dose Schedule and Enhanced Conversational Recast Treatment for Children With Specific Language Impairment.	Meyers-Denman, Christina N.; Plante, Elena	2	2016	0	1		Meyers-Denman, C. N., & Plante, E. (2016). Dose schedule and enhanced conversational recast treatment for children with specific language impairment. Language, Speech, and Hearing Services in Schools, 47(4), 334-346.
443b	A Usability Study of Internet-Based Therapy for Naming Deficits in Aphasia.	Simic, Tijana; Leonard, Carol; Laird, Laura; Cupit, Jennifer; Hobler, Fiona; Rochon, Elizabeth	1	2016	0	1		Simic, T., Leonard, C., Laird, L., Cupit, J., Höbler, F., & Rochon, E. (2016). A usability study of internet-based therapy for naming deficits in aphasia. American Journal of Speech-Language Pathology, 25(4), 642-653.
447b	Clinical and Quality of Life Outcomes of Speech Treatment for Parkinson's Disease Delivered to the Home Via Telerehabilitation: A Noninferiority Randomized Controlled Trial.	Theodoros, Deborah G.; Hill, Anne J.; Russell, Trevor G.	1	2016	0	1		Theodoros, D. G., Hill, A. J., & Russell, T. G. (2016). Clinical and quality of life outcomes of speech treatment for Parkinson's disease delivered to the home via telerehabilitation: a noninferiority randomized controlled trial. American Journal of Speech-Language Pathology, 25(2), 214-232.
465b	Video Feedback in Key Word Signing Training for Preservice Direct Support Staff.	Rombouts, Ellen; Meuris, Kristien; Maes, Bea; De Meyer, Anne-Marie; Zink, Inge	0	2016	0	1		Rombouts, E., Meuris, K., Maes, B., De Meyer, A. M., & Zink, I. (2016). Video feedback in key word signing training for preservice direct support staff. Journal of Speech, Language, and Hearing Research, 59(2), 342-348.
472b	The Use of Electropalatography in the Treatment of Acquired Apraxia of Speech.	Mauszycki, Shannon C.; Wright, Sandra; Dingus, Nicole; Wambaugh, Julie L.	1	2016	0	1		Mauszycki, S. C., Wright, S., Dingus, N., & Wambaugh, J. L. (2016). The use of electropalatography in the treatment of acquired apraxia of speech. American Journal of Speech-Language Pathology, 25(4S), S697-S715.
482b	Use of tDCS in Aphasia Rehabilitation: A Systematic Review of the Behavioral Interventions Implemented With Noninvasive Brain Stimulation for Language Recovery.	Galletta, Elizabeth E.; Conner, Peggy; Vogel-Eyny, Amy; Marangolo, Paola	1	2016	0	1		Galletta, E. E., Conner, P., Vogel-Eyny, A., & Marangolo, P. (2016). Use of tDCS in aphasia rehabilitation: A systematic review of the behavioral interventions implemented with noninvasive brain stimulation for language recovery. American Journal of Speech-Language Pathology, 25(4S), S854-S867.
491b	The Palin Parent Rating Scales: Parents' Perspectives of Childhood Stuttering and Its Impact.	Millard, Sharon K.; Davis, Stephen	0	2016	1	0		Millard, S. K., & Davis, S. (2016). The Palin Parent Rating Scales: Parents' perspectives of childhood stuttering and its impact. Journal of Speech, Language, and Hearing Research, 59(5), 950-963.
494b	Sentence Recall by Children With SLI Across Two Nonmainstream Dialects of English.	Oetting, Janna B.; McDonald, Janet L.; Seidel, Christy M.; Hegarty, Michael	0	2016	1	0		Oetting, J. B., McDonald, J. L., Seidel, C. M., & Hegarty, M. (2016). Sentence recall by children with SLI across two nonmainstream dialects of English. Journal of Speech, Language, and Hearing Research, 59(1), 183-194.
495b	Augmenting College Students' Study of Speech-Language Pathology Using Computer-Based Mini Quiz Games.	Vinney, Lisa A.; Howles, Les; Leverson, Glen; Connorb, Nadine P.	1	2016	0	1		Vinney, L. A., Howles, L., Leverson, G., & Connor, N. P. (2016). Augmenting college students' study of speech-language pathology using computer-based mini quiz games. American journal of speech-language pathology, 25(3), 416-425.
496b	A Comparison of High and Low Dosages of a Component of Milieu Teaching Strategies for Two Preschool-Age Learners With Autism Spectrum Disorder.	Julien, Hannah M.; Reichle, Joe; Nippold, Marilyn; Proctor-Williams, Kerry	2	2016	0	1		Julien, H. M., & Reichle, J. (2016). A comparison of high and low dosages of a component of milieu teaching strategies for two preschool-age learners with autism spectrum disorder. Language, Speech, and Hearing Services in Schools, 47(1), 87-98.
498b	Adaptation of the MacArthur-Bates Communicative Development Inventories for Spanish Children With Down Syndrome: Validity and Reliability Data for Vocabulary.	Galeote, Miguel; Checa, Elena; Sanchez-Palacios, Concepcian; Sebastian, Eugenia; Soto, Pilar	1	2016	1	0		Galeote, M., Checa, E., Sánchez-Palacios, C., Sebastián, E., & Soto, P. (2016). Adaptation of the MacArthur-Bates Communicative Development Inventories for Spanish children with Down Syndrome: Validity and reliability data for vocabulary. American journal of speech-language pathology, 25(3), 371-380.
501b	Literate Language Intervention With High-Need Prekindergarten Children: A Randomized Trial.	Phillips, Beth M.; Tabulda, Galiya; Ingrole, Smriti A.; Webb Burris, Pam; Sedgwick, T. Kayla; Shiyi Chen	0	2016	0	1		Phillips, B. M., Tabulda, G., Ingrole, S. A., Burris, P. W., Sedgwick, T. K., & Chen, S. (2016). Literate Language Intervention With High-Need Prekindergarten Children: A Randomized Trial. Journal of Speech, Language, and Hearing Research, 59(6), 1409-1420.
510b	Intensive Language Action Therapy in Chronic Aphasia: A Randomized Clinical Trial Examining Guidance by Constraint.	Kurland, Jacquie; Stanek, III, Edward J.; Stokes, Polly; Minming Li; Andrianopoulos, Mary	1	2016	0	1		Kurland, J., Stanek III, E. J., Stokes, P., Li, M., & Andrianopoulos, M. (2016). Intensive language action therapy in chronic aphasia: A randomized clinical trial examining guidance by constraint. American journal of speech-language pathology, 25(4S), S798-S812.
516b	Towards a Theory of Learning for Naming Rehabilitation: Retrieval Practice and Spacing Effects.	Middleton, Erica L.; Schwartz, Myrna F.; Rawson, Katherine A.; Traut, Hilary; Verkuilen, Jay	0	2016	0	1		Middleton, E. L., Schwartz, M. F., Rawson, K. A., Traut, H., & Verkuilen, J. (2016). Towards a theory of learning for naming rehabilitation: Retrieval practice and spacing effects. Journal of Speech, Language, and Hearing Research, 59(5), 1111-1122.
538b	Assessing Measurement Invariance for Spanish Sentence Repetition and Morphology Elicitation Tasks.	Kapantzoglou, Maria; Thompson, Marilyn S.; Gray, Shelley; Restrepo, M. Adelaida	0	2016	1	0		Kapantzoglou, M., Thompson, M. S., Gray, S., & Restrepo, M. A. (2016). Assessing measurement invariance for Spanish sentence repetition and morphology elicitation tasks. Journal of Speech, Language, and Hearing Research, 59(2), 254-266.
540b	A Prekindergarten Curriculum Supplement for Enhancing Mainstream American English Knowledge in Nonmainstream American English Speakers.	Edwards, Jan R.; Rosin, Peggy	2	2016	0	1		Edwards, J. R., & Rosin, P. (2016). A prekindergarten curriculum supplement for enhancing mainstream American English knowledge in nonmainstream American English speakers. Language, speech, and hearing services in schools, 47(2), 113-122.
548b	The Effects of Sentence Repetition-Based Working Memory Treatment on Sentence Comprehension Abilities in Individuals With Aphasia.	Eom, Bora; Sung, Jee Eun	1	2016	0	1		Eom, B., & Sung, J. E. (2016). The effects of sentence repetition–based working memory treatment on sentence comprehension abilities in individuals with aphasia. American Journal of Speech-Language Pathology, 25(4S), S823-S838.
550b	Early Language Intervention Using Distance Video-Teleconferencing: A Pilot Study of Young Boys With Fragile X Syndrome and Their Mothers.	McDuffie, Andrea; Oakes, Ashley; Machalicek, Wendy; Ma, Monica; Bullard, Lauren; Nelson, Sarah; Abbeduto, Leonard	1	2016	0	1		McDuffie, A., Oakes, A., Machalicek, W., Ma, M., Bullard, L., Nelson, S., & Abbeduto, L. (2016). Early language intervention using distance video-teleconferencing: a pilot study of young boys with fragile X syndrome and their mothers. American Journal of Speech-Language Pathology, 25(1), 46-66.
554b	Bilingual and Home Language Interventions With Young Dual Language Learners: A Research Synthesis.	Duran, Lillian K.; Hartzheim, Daphne; Lund, Emily M.; Simonsmeier, Vicki; Kohlmeier, Theresa L.	2	2016	0	1		Durán, L. K., Hartzheim, D., Lund, E. M., Simonsmeier, V., & Kohlmeier, T. L. (2016). Bilingual and home language interventions with young dual language learners: A research synthesis. Language, Speech, and Hearing Services in Schools, 47(4), 347-371.
556b	Comparing Measures of Voice Quality From Sustained Phonation and Continuous Speech.	Gerratt, Bruce R.; Kreiman, Jody; Garellek, Marc	0	2016	1	0		Gerratt, B. R., Kreiman, J., & Garellek, M. (2016). Comparing measures of voice quality from sustained phonation and continuous speech. Journal of Speech, Language, and Hearing Research, 59(5), 994-1001.
563b	Feasibility of Clinical Endoscopy and Stroboscopy in Children With Bilateral Vocal Fold Lesions.	Zacharias, Stephanie R. C.; Brehm, Susan Baker; Weinrich, Barbara; Kelchner, Lisa; Tabangin, Meredith; de Alarcon, Alessandro	1	2016	1	0		Zacharias, S. R., Brehm, S. B., Weinrich, B., Kelchner, L., Tabangin, M., & de Alarcon, A. (2016). Feasibility of clinical endoscopy and stroboscopy in children with bilateral vocal fold lesions. American journal of speech-language pathology, 25(4), 598-604.
564b	Measuring Speech Comprehensibility in Students with Down Syndrome.	Yoder, Paul J.; Woynaroski, Tiffany; Camarata, Stephen	0	2016	1	0		Yoder, P. J., Woynaroski, T., & Camarata, S. (2016). Measuring speech comprehensibility in students with down syndrome. Journal of Speech, Language, and Hearing Research, 59(3), 460-467.
566b	Feasibility of a Recasting and Auditory Bombardment Treatment With Young Cochlear Implant Users.	Encinas, Danielle; Plante, Elena	2	2016	0	1		Encinas, D., & Plante, E. (2016). Feasibility of a recasting and auditory bombardment treatment with young cochlear implant users. Language, Speech, and Hearing Services in Schools, 47(2), 157-170.
567b	Parent Reports of Young Spanish-English Bilingual Children's Productive Vocabulary: A Development and Validation Study.	Mancilla-Martinez, Jeannette; Gamez, Perla B.; Vagh, Shaher Banu; Lesaux, Nonie K.; Nippold, Marilyn; Alt, Mary	2	2016	1	0		Mancilla-Martinez, J., Gámez, P. B., Vagh, S. B., & Lesaux, N. K. (2016). Parent reports of young Spanish–English bilingual children's productive vocabulary: A development and validation study. Language, speech, and hearing services in schools, 47(1), 1-15.
568b	Be Clear: A New Intensive Speech Treatment for Adults With Nonprogressive Dysarthria.	Park, Stacie; Theodoros, Deborah; Finch, Emma; Cardell, Elizabeth	1	2016	0	1		Park, S., Theodoros, D., Finch, E., & Cardell, E. (2016). Be clear: A new intensive speech treatment for adults with nonprogressive dysarthria. American Journal of Speech-Language Pathology, 25(1), 97-110.
570b	Objective Measure of Nasal Air Emission Using Nasal Accelerometry.	Cler, Meredith J.; Yu-An S. Lien; Braden, Maia N.; Mittelman, Talia; Downing, Kerri; Stepp, Cara E.	0	2016	1	0		Cler, M. J., Lien, Y. A. S., Braden, M. N., Mittelman, T., Downing, K., & Stepp, C. E. (2016). Objective measure of nasal air emission using nasal accelerometry. Journal of Speech, Language, and Hearing Research, 59(5), 1018-1024.
571b	Comparison of African American Children's Performances on a Minimal Competence Core for Morphosyntax and the Index of Productive Syntax.	Stockman, Ida J.; Newkirk-Turner, Brandi L.; Swartzlander, Elaina; Morris, Lekeitha R.	1	2016	1	0		Stockman, I. J., Newkirk-Turner, B. L., Swartzlander, E., & Morris, L. R. (2016). Comparison of African American children's performances on a minimal competence core for morphosyntax and the Index of Productive Syntax. American Journal of Speech-Language Pathology, 25(1), 80-96.
572b	Use of Language Sample Analysis by School-Based SLPs: Results of a Nationwide Survey.	Pavelko, Stacey L.; Owens Jr., Robert E.; Ireland, Marie; Hahs-Vaughn, Debbie L.	2	2016	1	0		Pavelko, S. L., Owens Jr, R. E., Ireland, M., & Hahs-Vaughn, D. L. (2016). Use of language sample analysis by school-based SLPs: Results of a nationwide survey. Language, speech, and hearing services in schools, 47(3), 246-258.
580b	Exploring the Utility of a School-Age Narrative Microstructure Index: Proportion of Restricted Utterances.	Jerger, Sara; Thorne, John C.	2	2016	1	0		Jerger, S., & Thorne, J. C. (2016). Exploring the utility of a school-age narrative microstructure index: Proportion of restricted utterances. Language, speech, and hearing services in schools, 47(2), 171-180.
583b	Accuracy of Self-Reported Estimates of Daily Voice Use in Adults With Normal and Disordered Voices.	Mehta, Daryush D.; Cheyne II, Harold A.; Wehner, Asa; Heaton, James T.; Hillman, Robert E.	1	2016	1	0		Mehta, D. D., Cheyne, H. A., Wehner, A., Heaton, J. T., & Hillman, R. E. (2016). Accuracy of self-reported estimates of daily voice use in adults with normal and disordered voices. American Journal of Speech-Language Pathology, 25(4), 634-641.
592b	Evaluation of Speech Amplification Devices in Parkinson's Disease.	Andreetta, Monika D.; Adams, Scott G.; Dykstra, Allyson D.; Jog, Mandar	1	2016	0	1		Andreetta, M. D., Adams, S. G., Dykstra, A. D., & Jog, M. (2016). Evaluation of speech amplification devices in Parkinson's disease. American journal of speech-language pathology, 25(1), 29-45.
596b	Evaluating Treatment and Generalization Patterns of Two Theoretically Motivated Sentence Comprehension Therapies.	Des Roches, Carrie A.; Vallila-Rohter, Sofia; Villard, Sarah; Tripodis, Yorghos; Caplan, David; Kiran, Swathi	1	2016	0	1		Des Roches, C. A., Vallila-Rohter, S., Villard, S., Tripodis, Y., Caplan, D., & Kiran, S. (2016). Evaluating treatment and generalization patterns of two theoretically motivated sentence comprehension therapies. American journal of speech-language pathology, 25(4S), S743-S757.
600b	Treating Speech Comprehensibility in Students With Down Syndrome.	Yoder, Paul J.; Camarata, Stephen; Woynaroski, Tiffany	0	2016	0	1		Yoder, P. J., Camarata, S., & Woynaroski, T. (2016). Treating speech comprehensibility in students with Down syndrome. Journal of Speech, Language, and Hearing Research, 59(3), 446-459.
609b	An Item Response Theory-Based, Computerized Adaptive Testing Version of the MacArthur-Bates Communicative Development Inventory: Words & Sentences (CDI:WS).	Makransky, Guido; Dale, Philip S.; Havmose, Philip; Bleses, Dorthe	0	2016	1	0		Makransky, G., Dale, P. S., Havmose, P., & Bleses, D. (2016). An item response theory–based, computerized adaptive testing version of the MacArthur–Bates Communicative Development Inventory: Words & Sentences (CDI: WS). Journal of Speech, Language, and Hearing Research, 59(2), 281-289.
612b	Screening for Language Delay: Growth Trajectories of Language Ability in Low- and High-Performing Children.	Klem, Marianne; Hagtvet, Bente; Hulme, Charles; Gustafsson, Jan-Eric	0	2016	1	0		Klem, M., Hagtvet, B., Hulme, C., & Gustafsson, J. E. (2016). Screening for language delay: Growth trajectories of language ability in low-and high-performing children. Journal of Speech, Language, and Hearing Research, 59(5), 1035-1045.
617b	Comparison of Intelligibility Measures for Adults With Parkinson's Disease, Adults With Multiple Sclerosis, and Healthy Controls.	Stipancic, Kaila L.; Tjaden, Kris; Wilding, Gregory	0	2016	1	0		Stipancic, K. L., Tjaden, K., & Wilding, G. (2016). Comparison of intelligibility measures for adults with Parkinson's disease, adults with multiple sclerosis, and healthy controls. Journal of Speech, Language, and Hearing Research, 59(2), 230-238.
619b	Using Spaced Retrieval With External Aids to Improve Use of Compensatory Strategies During Eating for Persons With Dementia.	Benigas, Jeanette E.; Bourgeois, Michelle	1	2016	0	1		Benigas, J. E., & Bourgeois, M. (2016). Using spaced retrieval with external aids to improve use of compensatory strategies during eating for persons with dementia. American journal of speech-language pathology, 25(3), 321-334.
621b	Picture Exchange Communication System and Pals: A Peer-Mediated Augmentative and Alternative Communication Intervention for Minimally Verbal Preschoolers With Autism.	Thiemann-Bourque, Kathy; Brady, Nancy; McGuff, Sara; Stump, Keenan; Naylor, Amy	0	2016	0	1		Thiemann-Bourque, K., Brady, N., McGuff, S., Stump, K., & Naylor, A. (2016). Picture exchange communication system and pals: A peer-mediated augmentative and alternative communication intervention for minimally verbal preschoolers with autism. Journal of Speech, Language, and Hearing Research, 59(5), 1133-1145.
623b	The Use of One or Three Semantic Associative Primes in Treating Anomia in Aphasia.	Hashimoto, Naomi	1	2016	0	1		Hashimoto, N. (2016). The use of one or three semantic associative primes in treating anomia in aphasia. American journal of speech-language pathology, 25(4S), S665-S686.
632b	Differentiating School-Aged Children With and Without Language Impairment Using Tense and Grammaticality Measures From a Narrative Task.	Ling-Yu Guo; Schneider, Phyllis	0	2016	1	0		Guo, L. Y., & Schneider, P. (2016). Differentiating school-aged children with and without language impairment using tense and grammaticality measures from a narrative task. Journal of Speech, Language, and Hearing Research, 59(2), 317-329.
637b	Comparison of Videostroboscopy to Stroboscopy Derived From High-Speed Videoendoscopy for Evaluating Patients With Vocal Fold Mass Lesions.	Powell, Maria E.; Deliyski, Dimitar D.; Hillman, Robert E.; Zeitels, Steven M.; Burns, James A.; Mehta, Daryush D.	1	2016	1	0		Powell, M. E., Deliyski, D. D., Hillman, R. E., Zeitels, S. M., Burns, J. A., & Mehta, D. D. (2016). Comparison of videostroboscopy to stroboscopy derived from high-speed videoendoscopy for evaluating patients with vocal fold mass lesions. American journal of speech-language pathology, 25(4), 576-589.
643b	Embedded Instruction Improves Vocabulary Learning During Automated Storybook Reading Among High-Risk Preschoolers.	Goldstein, Howard; Kelley, Elizabeth; Greenwood, Charles; McCune, Luke; Carta, Judith; Atwater, Jane; Guerrero, Gabriela; McCarthy, Tanya; Schneider, Naomi; Spencer, Trina	0	2016	0	1		Goldstein, H., Kelley, E., Greenwood, C., McCune, L., Carta, J., Atwater, J., ... & Spencer, T. (2016). Embedded instruction improves vocabulary learning during automated storybook reading among high-risk preschoolers. Journal of Speech, Language, and Hearing Research, 59(3), 484-500.
646b	Lidcombe Program Webcam Treatment for Early Stuttering: A Randomized Controlled Trial.	Bridgman, Kate; Onslow, Mark; O'Brian, Susan; Jones, Mark; Block, Susan	0	2016	0	1		Bridgman, K., Onslow, M., O’Brian, S., Jones, M., & Block, S. (2016). Lidcombe program webcam treatment for early stuttering: A randomized controlled trial. Journal of Speech, Language, and Hearing Research, 59(5), 932-939.
647b	Use of tDCS in Aphasia Rehabilitation: A Systematic Review of the Behavioral Interventions Implemented With Noninvasive Brain Stimulation for Language Recovery.	Galletta, Elizabeth E.; Conner, Peggy; Vogel-Eyny, Amy; Marangolo, Paola	1	2016	0	1		Galletta, E. E., Conner, P., Vogel-Eyny, A., & Marangolo, P. (2016). Use of tDCS in aphasia rehabilitation: A systematic review of the behavioral interventions implemented with noninvasive brain stimulation for language recovery. American Journal of Speech-Language Pathology, 25(4S), S854-S867.
655b	Assessment and Treatment of Cognition and Communication Skills in Adults With Acquired Brain Injury via Telepractice: A Systematic Review.	Coleman, Jaumeiko J.; Frymark, Tobi; Franceschini, Nicole M.; Theodoros, Deborah G.	1	2015	1	1		Coleman, J. J., Frymark, T., Franceschini, N. M., & Theodoros, D. G. (2015). Assessment and treatment of cognition and communication skills in adults with acquired brain injury via telepractice: A systematic review. American journal of speech-language pathology, 24(2), 295-315.
660b	A Randomized Controlled Trial of Two Semi-Occluded Vocal Tract Voice Therapy Protocols.	Kapsner-Smith, Mara R.; Hunter, Eric J.; Kirkham, Kimberly; Cox, Karin; Titze, Ingo R.	0	2015	0	1		Kapsner-Smith, M. R., Hunter, E. J., Kirkham, K., Cox, K., & Titze, I. R. (2015). A randomized controlled trial of two semi-occluded vocal tract voice therapy protocols. Journal of Speech, Language, and Hearing Research, 58(3), 535-549.
663b	Teaching a Child With Autism to Request Breaks While Concurrently Increasing Task Engagement.	Kreibich, Shelley R.; Mo Chen; Reichle, Joe	2	2015	0	1		Kreibich, S. R., Chen, M., & Reichle, J. (2015). Teaching a child with autism to request breaks while concurrently increasing task engagement. Language, speech, and hearing services in schools, 46(3), 256-265.
668b	Investigating a Multimodal Intervention for Children With Limited Expressive Vocabularies Associated With Autism.	Brady, Nancy C.; Storkel, Holly L.; Bushnell, Paige; Barker, R. Michael; Saunders, Kate; Daniels, Debby; Fleming, Kandace	1	2015	0	1		Brady, N. C., Storkel, H. L., Bushnell, P., Barker, R. M., Saunders, K., Daniels, D., & Fleming, K. (2015). Investigating a multimodal intervention for children with limited expressive vocabularies associated with autism. American Journal of Speech-Language Pathology, 24(3), 438-459.
670b	Sound Production Treatment: Synthesis and Quantification of Outcomes.	Bailey, Dallin J.; Eatchel, Kelly; Wambaugh, Julie	1	2015	0	1		Bailey, D. J., Eatchel, K., & Wambaugh, J. (2015). Sound production treatment: Synthesis and quantification of outcomes. American Journal of Speech-Language Pathology, 24(4), S798-S814.
674b	Predicting and Influencing Voice Therapy Adherence Using Social-Cognitive Factors and Mobile Video.	van Leer, Eva; Connor, Nadine P.	1	2015	0	1		van Leer, E., & Connor, N. P. (2015). Predicting and influencing voice therapy adherence using social–cognitive factors and mobile video. American journal of speech-language pathology, 24(2), 164-176.
678b	Language Ability Groups in Bilingual Children: A Latent Profile Analysis.	Kapantzoglou, Maria; Restrepo, M. Adelaida; Gray, Shelley; Thompson, Marilyn S.	0	2015	1	0		Kapantzoglou, M., Restrepo, M. A., Gray, S., & Thompson, M. S. (2015). Language ability groups in bilingual children: A latent profile analysis. Journal of Speech, Language, and Hearing Research, 58(5), 1549-1562.
680b	Efficacy of the Modifying Phonation Intervals (MPI) Stuttering Treatment Program With Adults Who Stutter.	Ingham, Roger J.; Ingham, Janis C.; Bothe, Anne K.; Wang, Yuedong; Kilgo, Martin	1	2015	0	1		Ingham, R. J., Ingham, J. C., Bothe, A. K., Wang, Y., & Kilgo, M. (2015). Efficacy of the modifying phonation intervals (MPI) stuttering treatment program with adults who stutter. American journal of speech-language pathology, 24(2), 256-271.
682b	Treatment for Alexia With Agraphia Following Left Ventral Occipito-Temporal Damage: Strengthening Orthographic Representations Common to Reading and Spelling.	Kim, Esther S.; Rising, Kindle; Rapcsak, Steven Z.; Beeson, Palagie M.	0	2015	0	1		Kim, E. S., Rising, K., Rapcsak, S. Z., & Beeson, P. M. (2015). Treatment for alexia with agraphia following left ventral occipito-temporal damage: Strengthening orthographic representations common to reading and spelling. Journal of Speech, Language, and Hearing Research, 58(5), 1521-1537.
698b	Telepractice Versus In-Person Delivery of Voice Therapy for Primary Muscle Tension Dysphonia.	Rangarathnam, Balaji; McCullough, Gary H.; Pickett, Hylan; Zraick, Richard I.; Tulunay-Ugur, Ozlem; McCullough, Kimberly C.	1	2015	0	1		Rangarathnam, B., McCullough, G. H., Pickett, H., Zraick, R. I., Tulunay-Ugur, O., & McCullough, K. C. (2015). Telepractice versus in-person delivery of voice therapy for primary muscle tension dysphonia. American Journal of Speech-Language Pathology, 24(3), 386-399.
700b	Automated Speech Rate Measurement in Dysarthria.	Martens, Heidi; Dekens, Tomas; Van Nuffelen, Gwen; Latacz, Lukas; Verhelst, Werner; De Bodt, Marc	0	2015	1	0		Martens, H., Dekens, T., Van Nuffelen, G., Latacz, L., Verhelst, W., & De Bodt, M. (2015). Automated speech rate measurement in dysarthria. Journal of Speech, Language, and Hearing Research, 58(3), 698-712.
701b	Treatment for Acquired Apraxia of Speech: A Systematic Review of Intervention Research Between 2004 and 2012.	Ballard, Kirrie J.; Wambaugh, Julie L.; Duffy, Joseph R.; Layfield, Claire; Maas, Edwin; Mauszycki, Shannon; McNeil, Malcolm R.	1	2015	0	1		Ballard, K. J., Wambaugh, J. L., Duffy, J. R., Layfield, C., Maas, E., Mauszycki, S., & McNeil, M. R. (2015). Treatment for acquired apraxia of speech: A systematic review of intervention research between 2004 and 2012. American Journal of Speech-Language Pathology, 24(2), 316-337.
703b	A Randomized Controlled Trial of Two Syntactic Treatment Procedures With Cantonese-Speaking, School-Age Children With Language Disorders.	To, Carol K. S.; Hoi Ming Lui; Xin Xin Li; Lam, Gary Y. H.	0	2015	0	1		To, C. K., Lui, H. M., Li, X. X., & Lam, G. Y. (2015). A Randomized Controlled Trial of Two Syntactic Treatment Procedures With Cantonese-Speaking, School-Age Children With Language Disorders. Journal of Speech, Language, and Hearing Research, 58(4), 1258-1272.
704b	Item Response Theory Modeling of the Philadelphia Naming Test.	Fergadiotis, Gerasimos; Kellough, Stacey; Hula, William D.	0	2015	1	0		Fergadiotis, G., Kellough, S., & Hula, W. D. (2015). Item response theory modeling of the Philadelphia Naming Test. Journal of Speech, Language, and Hearing Research, 58(3), 865-877.
717b	Psychometric Characteristics of Single-Word Tests of Children's Speech Sound Production.	Flipsen Jr., Peter; Ogiela, Diane A.	2	2015	1	0		Flipsen Jr, P., & Ogiela, D. A. (2015). Psychometric characteristics of single-word tests of children's speech sound production. Language, Speech, and Hearing Services in Schools, 46(2), 166-178.
720b	Face-Referenced Measurement of Perioral Stiffness and Speech Kinematics in Parkinson's Disease.	Shin Ying Chu; Barlow, Steven M.; Jaehoon Lee	0	2015	0	1		Chu, S. Y., Barlow, S. M., & Lee, J. (2015). Face-Referenced Measurement of Perioral Stiffness and Speech Kinematics in Parkinson's Disease. Journal of Speech, Language, and Hearing Research, 58(2), 201-212.
733b	Using Direct Instruction: Teaching Preposition Use to Students With Intellectual Disability.	Hicks, S. Christy; Rivera, Christopher J.; Wood, Charles L.	2	2015	0	1		Hicks, S. C., Rivera, C. J., & Wood, C. L. (2015). Using direct instruction: Teaching preposition use to students with intellectual disability. Language, speech, and hearing services in schools, 46(3), 194-206.
749b	Small Groups, Big Gains: Efficacy of a Tier 2 Phonological Awareness Intervention With Preschoolers With Early Literacy Deficits.	Kruse, Lydia G.; Spencer, Trina D.; Olszewski, Arnold; Goldstein, Howard	1	2015	0	1		Kruse, L. G., Spencer, T. D., Olszewski, A., & Goldstein, H. (2015). Small groups, big gains: Efficacy of a tier 2 phonological awareness intervention with preschoolers with early literacy deficits. American Journal of Speech-Language Pathology, 24(2), 189-205.
752b	Effects of Coaching on Educators' and Preschoolers' Use of References to Print and Phonological Awareness During a Small-Group Craft/Writing Activity.	Milburn, Trelani F.; Hipfner-Boucher, Kathleen; Weitzman, Elaine; Greenberg, Janice; Pelletier, Janette; Girolametto, Luigi; Nippold, Marilyn; Smith-Lock, Karen	2	2015	0	1	1	Milburn, T. F., Hipfner-Boucher, K., Weitzman, E., Greenberg, J., Pelletier, J., & Girolametto, L. (2015). Effects of coaching on educators' and preschoolers' use of references to print and phonological awareness during a small-group craft/writing activity. Language, speech, and hearing services in schools, 46(2), 94-111.
757b	Predicting Treatment Time and Long-Term Outcome of the Lidcombe Program: A Replication and Reanalysis.	Guitar, Barry; Kazenski, Danra; Howard, Alan; Cousins, S. Freddie; Fader, Elena; Haskell, Piper	1	2015	0	1		Guitar, B., Kazenski, D., Howard, A., Cousins, S. F., Fader, E., & Haskell, P. (2015). Predicting treatment time and long-term outcome of the Lidcombe Program: A replication and reanalysis. American Journal of Speech-Language Pathology, 24(3), 533-544.
758b	Sample Length Affects the Reliability of Language Sample Measures in 3-Year-Olds: Evidence From Parent-Elicited Conversational Samples.	Guo, Ling-Yu; Eisenberg, Sarita; Nippold, Marilyn; Hoffman, LaVae	2	2015	1	0		Guo, L. Y., & Eisenberg, S. (2015). Sample length affects the reliability of language sample measures in 3-year-olds: Evidence from parent-elicited conversational samples. Language, speech, and hearing services in schools, 46(2), 141-153.
759b	Differential Diagnosis of Children with Suspected Childhood Apraxia of Speech.	Murray, Elizabeth; McCabe, Patricia; Heard, Robert; Ballard, Kirrie J.	0	2015	1	0		Murray, E., McCabe, P., Heard, R., & Ballard, K. J. (2015). Differential diagnosis of children with suspected childhood apraxia of speech. Journal of Speech, Language, and Hearing Research, 58(1), 43-60.
760b	Masked Repetition Priming in Treatment of Anomia: A Phase 2 Study.	Silkesa, JoAnn P.	1	2015	0	1		Silkes, J. P. (2015). Masked repetition priming in treatment of anomia: A Phase 2 study. American journal of speech-language pathology, 24(4), S895-S912.
776b	Semantic Feature Analysis: Further Examination of Outcomes.	DeLong, Catharine; Nessler, Christina; Wright, Sandra; Wambaugh, Julie	1	2015	0	1		DeLong, C., Nessler, C., Wright, S., & Wambaugh, J. (2015). Semantic feature analysis: Further examination of outcomes. American Journal of Speech-Language Pathology, 24(4), S864-S879.
778b	Structure, Processes, and Retrospective Outcomes From an Intensive Comprehensive Aphasia Program.	Babbitt, Edna M.; Worrall, Linda; Cherney, Leora R.	1	2015	0	1		Babbitt, E. M., Worrall, L., & Cherney, L. R. (2015). Structure, processes, and retrospective outcomes from an intensive comprehensive aphasia program. American Journal of Speech-Language Pathology, 24(4), S854-S863.
781b	The Aphasia Communication Outcome Measure (ACOM): Dimensionality, Item Bank Calibration, and Initial Validation.	Hula, William D.; Doyle, Patrick J.; Stone, Clement A.; Austermann Hula, Shannon N.; Kellough, Stacey; Wambaugh, Julie L.; Ross, Katherine B.; Schumacher, James G.; St. Jacque, Ann	0	2015	1	0		Hula, W. D., Doyle, P. J., Stone, C. A., Austermann Hula, S. N., Kellough, S., Wambaugh, J. L., ... & St. Jacque, A. (2015). The Aphasia Communication Outcome Measure (ACOM): Dimensionality, item bank calibration, and initial validation. Journal of Speech, Language, and Hearing Research, 58(3), 906-919.
784b	Intelligibility in Context Scale: Normative and Validation Data for English-Speaking Preschoolers.	McLeod, Sharynne; Crowe, Kathryn; Shahaeian, Ameneh	2	2015	1	0		McLeod, S., Crowe, K., & Shahaeian, A. (2015). Intelligibility in Context Scale: Normative and validation data for English-speaking preschoolers. Language, Speech, and Hearing Services in Schools, 46(3), 266-276.
786b	Teaching Adults With Intellectual Disability Manual Signs Through Their Support Staff: A Key Word Signing Program.	Meuris, Kristien; Maes, Bea; Zink, Inge	1	2015	0	1		Meuris, K., Maes, B., & Zink, I. (2015). Teaching adults with intellectual disability manual signs through their support staff: A key word signing program. American Journal of Speech-Language Pathology, 24(3), 545-560.
788b	Development and Simulation Testing of a Computerized Adaptive Version of the Philadelphia Naming Test.	Hula, William D.; Kellough, Stacey; Fergadiotis, Gerasimos	0	2015	1	0		Hula, W. D., Kellough, S., & Fergadiotis, G. (2015). Development and simulation testing of a computerized adaptive version of the Philadelphia Naming Test. Journal of Speech, Language, and Hearing Research, 58(3), 878-890.
797b	Using Virtual Technology to Promote Functional Communication in Aphasia: Preliminary Evidence From Interactive Dialogues With Human and Virtual Clinicians.	Kalinyak-Fliszar, Michelene; Martin, Nadine; Keshner, Emily; Rudnicky, Alex; Shi, Justin; Teodoro, Gregory	1	2015	0	1		Kalinyak-Fliszar, M., Martin, N., Keshner, E., Rudnicky, A., Shi, J., & Teodoro, G. (2015). Using virtual technology to promote functional communication in aphasia: Preliminary evidence from interactive dialogues with human and virtual clinicians. American journal of speech-language pathology, 24(4), S974-S989.
804b	Sample Size for Measuring Grammaticality in Preschool Children From Picture- Elicited Language Samples.	Eisenberg, Sarita L.; Ling-Yu Guob; Nippold, Marilyn; Alt, Mary	2	2015	1	0		Eisenberg, S. L., & Guo, L. Y. (2015). Sample size for measuring grammaticality in preschool children from picture-elicited language samples. Language, speech, and hearing services in schools, 46(2), 81-93.
808b	Is There a Role for Exercise in the Management of Bulbar Dysfunction in Amyotrophic Lateral Sclerosis?	Plowman, Emily K.	0	2015	0	1		Plowman, E. K. (2015). Is there a role for exercise in the management of bulbar dysfunction in amyotrophic lateral sclerosis?. Journal of Speech, Language, and Hearing Research, 58(4), 1151-1166.
811b	The Influence of Phonomotor Treatment on Word Retrieval Abilities in 26 Individuals With Chronic Aphasia: An Open Trial.	Kendall, Diane L.; Oelke, Megan; Brookshire, Carmel Elizabeth; Nadeau, Stephen E.	0	2015	0	1		Kendall, D. L., Oelke, M., Brookshire, C. E., & Nadeau, S. E. (2015). The influence of phonomotor treatment on word retrieval abilities in 26 individuals with chronic aphasia: An open trial. Journal of Speech, Language, and Hearing Research, 58(3), 798-812.
812b	Stability of Word-Retrieval Errors With the AphasiaBank Stimuli.	Boyle, Mary	1	2015	1	0		Boyle, M. (2015). Stability of word-retrieval errors with the AphasiaBank stimuli. American Journal of Speech-Language Pathology, 24(4), S953-S960.
824b	Family Ratings of Communication Largely Reflect Expressive Language and Conversation-Level Ability in People With Aphasia.	Fucetola, Robert; Connor, Lisa Tabor	1	2015	1	0		Fucetola, R., & Tabor Connor, L. (2015). Family ratings of communication largely reflect expressive language and conversation-level ability in people with aphasia. American journal of speech-language pathology, 24(4), S790-S797.
825b	Constraint-Induced Aphasia Therapy Versus Intensive Semantic Treatment in Fluent Aphasia.	Wilssens, Ineke; Vandenborre, Dorien; van Dun, Kim; Verhoeven, Jo; Visch-Brink, Evy; Marien, Peter	1	2015	0	1		Wilssens, I., Vandenborre, D., van Dun, K., Verhoeven, J., Visch-Brink, E., & Mariën, P. (2015). Constraint-induced aphasia therapy versus intensive semantic treatment in fluent aphasia. American Journal of Speech-Language Pathology, 24(2), 281-294.
827b	A Randomized Controlled Trial for Children With Childhood Apraxia of Speech Comparing Rapid Syllable Transition Treatment and the Nuffield Dyspraxia Programme--Third Edition.	Murray, Elizabeth; McCabe, Patricia; Ballard, Kirrie J.	0	2015	0	1		Murray, E., McCabe, P., & Ballard, K. J. (2015). A randomized controlled trial for children with childhood apraxia of speech comparing rapid syllable transition treatment and the Nuffield Dyspraxia Programme–Third Edition. Journal of Speech, Language, and Hearing Research, 58(3), 669-686.
832b	Reliability and Validity of the Computerized Revised Token Test: Comparison of Reading and Listening Versions in Persons With and Without Aphasia.	McNeil, Malcolm R.; Pratt, Sheila R.; Szuminsky, Neil; Jee Eun Sung; Fossett, Tepanta R. D.; Fassbinder, Wiltrud; Lima, Kyoung Yuel	0	2015	1	0		McNeil, M. R., Pratt, S. R., Szuminsky, N., Sung, J. E., Fossett, T. R., Fassbinder, W., & Lim, K. Y. (2015). Reliability and validity of the computerized Revised Token Test: Comparison of reading and listening versions in persons with and without aphasia. Journal of Speech, Language, and Hearing Research, 58(2), 311-324.
834b	The Efficacy of Recasts in Language Intervention: A Systematic Review and Meta-Analysis.	Cleave, Patricia L.; Becker, Stephanie D.; Curran, Maura K.; Van Horne, Amanda J. Owen; Fey, Marc E.	1	2015	0	1		Cleave, P. L., Becker, S. D., Curran, M. K., Van Horne, A. J. O., & Fey, M. E. (2015). The efficacy of recasts in language intervention: A systematic review and meta-analysis. American Journal of Speech-Language Pathology, 24(2), 237-255.
835b	The Effectiveness of Two Grammar Treatment Procedures for Children With SLI: A Randomized Clinical Trial.	Smith-Lock, Karen M.; Leitao, Suze; Prior, Polly; Nickels, Lyndsey	2	2015	0	1		Smith-Lock, K. M., Leitão, S., Prior, P., & Nickels, L. (2015). The effectiveness of two grammar treatment procedures for children with SLI: A randomized clinical trial. Language, speech, and hearing services in schools, 46(4), 312-324.
838b	A Quasi-Universal Nonword Repetition Task as a Diagnostic Tool for Bilingual Children Learning Dutch as a Second Language.	Boerma, Tessel; Chiat, Shula; Leseman, Paul; Timmermeister, Mona; Wijnen, Frank; Blom, Elma	0	2015	1	0		Boerma, T., Chiat, S., Leseman, P., Timmermeister, M., Wijnen, F., & Blom, E. (2015). A quasi-universal nonword repetition task as a diagnostic tool for bilingual children learning Dutch as a second language. Journal of Speech, Language, and Hearing Research, 58(6), 1747-1760.
843b	Teaching Active Listening Skills to Pre-Service Speech-Language Pathologists: A First Step in Supporting Collaboration With Parents of Young Children Who Require AAC.	Thistle, Jennifer J.; McNaughton, David	2	2015	0	1		Thistle, J. J., & McNaughton, D. (2015). Teaching active listening skills to pre-service speech-language pathologists: A first step in supporting collaboration with parents of young children who require AAC. Language, speech, and hearing services in schools, 46(1), 44-55.
856b	Utility of a Language Screening Measure for Predicting Risk for Language Impairment in Bilinguals.	Lugo-Neris, Mirza J.; Pena, Elizabeth D.; Bedore, Lisa M.; Gillam, Ronald B.	1	2015	1	0		Lugo-Neris, M. J., Peña, E. D., Bedore, L. M., & Gillam, R. B. (2015). Utility of a language screening measure for predicting risk for language impairment in bilinguals. American Journal of Speech-Language Pathology, 24(3), 426-437.
860b	Monolingual or Bilingual Intervention for Primary Language Impairment? A Randomized Control Trial.	Thordardottir, Elin; Cloutier, Genevieve; Menard, Suzanne; Pelland-Blais, Elaine; Rvachew, Susan	0	2015	0	1		Thordardottir, E., Cloutier, G., Ménard, S., Pelland-Blais, E., & Rvachew, S. (2015). Monolingual or bilingual intervention for primary language impairment? A randomized control trial. Journal of Speech, Language, and Hearing Research, 58(2), 287-300.
862b	A Randomized Trial of 12-Week Interventions for the Treatment of Developmental Phonological Disorder in Francophone Children.	Rvachew, Susan; Brosseau-Lapre, Francoise	1	2015	0	1		Rvachew, S., & Brosseau-Lapré, F. (2015). A randomized trial of 12-week interventions for the treatment of developmental phonological disorder in Francophone children. American Journal of Speech-Language Pathology, 24(4), 637-658.
867b	Processing Speed Measures as Clinical Markers for Children With Language Impairment.	Park, Jisook; Miller, Carol A.; Mainela-Arnold, Elina	0	2015	1	0		Park, J., Miller, C. A., & Mainela-Arnold, E. (2015). Processing speed measures as clinical markers for children with language impairment. Journal of Speech, Language, and Hearing Research, 58(3), 954-960.
868b	Voice Relative Fundamental Frequency Via Neck-Skin Acceleration in Individuals With Voice Disorders.	Yu-An S. Lien; Calabrese, Carolyn R.; Michener, Carolyn M.; Murray, Elizabeth Heller; Van Stan, Jarrad H.; Mehta, Daryush D.; Hillman, Robert E.; Noordzij, J. Pieter; Stepp, Cara E.	0	2015	1	0		Lien, Y. A. S., Calabrese, C. R., Michener, C. M., Heller Murray, E., Van Stan, J. H., Mehta, D. D., ... & Stepp, C. E. (2015). Voice relative fundamental frequency via neck-skin acceleration in individuals with voice disorders. Journal of Speech, Language, and Hearing Research, 58(5), 1482-1487.
870b	Evidence-Based Systematic Review: Effects of Speech-Language Pathology Treatment for Individuals With Paradoxical Vocal Fold Motion.	Patel, Rita R.; Venediktov, Rebecca; Schooling, Tracy; Wang, Beverly	1	2015	0	1		Patel, R. R., Venediktov, R., Schooling, T., & Wang, B. (2015). Evidence-based systematic review: effects of speech-language pathology treatment for individuals with paradoxical vocal fold motion. American journal of speech-language pathology, 24(3), 566-584.
879b	Narrative Intervention for Children With Autism Spectrum Disorder (ASD)	Laing Gillam, Sandra; Hartzheim, Daphne; Studenka, Breanna; Simonsmeier, Vicki; Gillam, Ronald	0	2015	0	1		Gillam, S. L., Hartzheim, D., Studenka, B., Simonsmeier, V., & Gillam, R. (2015). Narrative intervention for children with autism spectrum disorder (ASD). Journal of Speech, Language, and Hearing Research, 58(3), 920-933.
881b	Tier 2 Language Intervention for Diverse Preschoolers: An Early-Stage Randomized Control Group Study Following an Analysis of Response to Intervention.	Spencer, Trina D.; Petersen, Douglas B.; Adams, John L.	1	2015	0	1		Spencer, T. D., Petersen, D. B., & Adams, J. L. (2015). Tier 2 language intervention for diverse preschoolers: An early-stage randomized control group study following an analysis of response to intervention. American Journal of Speech-Language Pathology, 24(4), 619-636.
884b	Teaching Children Who Use Augmentative and Alternative Communication to Ask Inverted Yes/No Questions Using Aided Modeling.	Kent-Walsh, Jennifer; Binger, Cathy; Buchanan, Carolyn	1	2015	0	1		Kent-Walsh, J., Binger, C., & Buchanan, C. (2015). Teaching children who use augmentative and alternative communication to ask inverted yes/no questions using aided modeling. American Journal of Speech-Language Pathology, 24(2), 222-236.
885b	Auditory Masking Effects on Speech Fluency in Apraxia of Speech and Aphasia: Comparison to Altered Auditory Feedback.	Jacks, Adam; Haley, Katarina L.	0	2015	0	1		Jacks, A., & Haley, K. L. (2015). Auditory masking effects on speech fluency in apraxia of speech and aphasia: Comparison to altered auditory feedback. Journal of Speech, Language, and Hearing Research, 58(6), 1670-1686.
886b	Improving Preschool Educators' Interactive Shared Book Reading: Effects of Coaching in Professional Development.	Rezzonico, Stefano; Hipfner-Boucher, Kathleen; Milburn, Trelani; Weitzman, Elaine; Greenberg, Janice; Pelletier, Janette; Girolametto, Luigi	1	2015	0	1	1	Rezzonico, S., Hipfner-Boucher, K., Milburn, T., Weitzman, E., Greenberg, J., Pelletier, J., & Girolametto, L. (2015). Improving preschool educators' interactive shared book reading: effects of coaching in professional development. American journal of speech-language pathology, 24(4), 717-732.
887b	The Efficacy of Stuttering Measurement Training: Evaluating Two Training Programs.	Bainbridge, Lauren A.; Stavros, Candace; Ebrahimian, Mineh; Yuedong Wang; Ingham, Roger J.	0	2015	1	0	1	Bainbridge, L. A., Stavros, C., Ebrahimian, M., Wang, Y., & Ingham, R. J. (2015). The efficacy of stuttering measurement training: Evaluating two training programs. Journal of Speech, Language, and Hearing Research, 58(2), 278-286.
892b	Variability and Diagnostic Accuracy of Speech Intelligibility Scores in Children.	Hustad, Katherine C.; Oakes, Ashley; Allison, Kristen	0	2015	1	0		Hustad, K. C., Oakes, A., & Allison, K. (2015). Variability and diagnostic accuracy of speech intelligibility scores in children. Journal of Speech, Language, and Hearing Research, 58(6), 1695-1707.
898b	Impact of Personal Relevance on Acquisition and Generalization of Script Training for Aphasia: A Preliminary Analysis.	Cherney, Leora R.; Kaye, Rosalind C.; Lee, Jaime B.; van Vuuren, Sarel	1	2015	0	1		Cherney, L. R., Kaye, R. C., Lee, J. B., & Van Vuuren, S. (2015). Impact of personal relevance on acquisition and generalization of script training for aphasia: A preliminary analysis. American Journal of Speech-Language Pathology, 24(4), S913-S922.
912b	Relationships Between Narrative Language Samples and Norm-Referenced Test Scores in Language Assessments of School-Age Children.	Eberta, Kerry Danahy; Scotta, Cheryl M.	2	2014	1	0		Ebert, K. D., & Scott, C. M. (2014). Relationships between narrative language samples and norm-referenced test scores in language assessments of school-age children. Language, Speech, and Hearing Services in Schools, 45(4), 337-350.
913b	Using Multiple Measures to Document Change in English Vowels Produced by Japanese, Korean, and Spanish Speakers: The Case for Goodness and Intelligibility.	Franklin, Amber D.; Stoel-Gammon, Carol	1	2014	0	1		Franklin, A. D., & Stoel-Gammon, C. (2014). Using multiple measures to document change in English vowels produced by Japanese, Korean, and Spanish speakers: The case for goodness and intelligibility. American Journal of Speech-language pathology, 23(4), 625-640.
914b	An Enhanced Protocol for Constraint-Induced Aphasia Therapy II: A Case Series.	Johnson, Margaret L.; Taub, Edward; Harper, Leslie H.; Wade, Jamie T.; Bowman, Mary H.; Bishop-McKay, Staci; Haddad, Michelle M.; Mark, Victor W.; Uswatte, Gitendra	1	2014	0	1		Johnson, M. L., Taub, E., Harper, L. H., Wade, J. T., Bowman, M. H., Bishop-McKay, S., ... & Uswatte, G. (2014). An enhanced protocol for constraint-induced aphasia therapy II: A case series. American Journal of Speech-Language Pathology.
915b	The Effect of Deep Brain Stimulation on the Speech Motor System.	Mucke, Doris; Becker, Johannes; Barbe, Michael T.; Meister, Ingo; Liebhart, Lena; Roettger, Timo B.; Dembek, Till; Timmermann, Lars; Grice, Martine	0	2014	0	1		Mücke, D., Becker, J., Barbe, M. T., Meister, I., Liebhart, L., Roettger, T. B., ... & Grice, M. (2014). The effect of deep brain stimulation on the speech motor system. Journal of Speech, Language, and Hearing Research, 57(4), 1206-1218.
924b	Quantitative Assessment of Interutterance Stability: Application to Dysarthria.	Cummins, Fred; Lowit, Anja; van Brenk, Frits	0	2014	1	0		Cummins, F., Lowit, A., & Van Brenk, F. (2014). Quantitative assessment of interutterance stability: Application to dysarthria. Journal of Speech, Language, and Hearing Research.
950b	Delayed Stimulus-Specific Improvements in Discourse Following Anomia Treatment Using an Intentional Gesture.	Altmann, Lori J. P.; Hazamy, Audrey A.; Carvajal, Pamela J.; Benjamin, Michelle; Rosenbek, John C.; Crossona, Bruce	0	2014	0	1		Altmann, L. J., Hazamy, A. A., Carvajal, P. J., Benjamin, M., Rosenbek, J. C., & Crosson, B. (2014). Delayed stimulus-specific improvements in discourse following anomia treatment using an intentional gesture. Journal of Speech, Language, and Hearing Research.
953b	Use of the Children's Communication Checklist-2 for Classification of Language Impairment Risk in Young School-Age Children With Attention-Deficit/Hyperactivity Disorder.	Timler, Geralyn R.	1	2014	1	0		Timler, G. R. (2014). Use of the children's communication Checklist—2 for classification of language impairment risk in young school-age children with attention-deficit/hyperactivity disorder. American journal of speech-language pathology.
954b	Effects of the Teach-Model-Coach-Review Instructional Approach on Caregiver Use of Language Support Strategies and Children's Expressive Language Skills.	Roberts, Megan Y.; Kaiser, Ann P.; Wolfe, Cathy E.; Bryant, Julie D.; Spidalieri, Alexandria M.	0	2014	0	1		Roberts, M. Y., Kaiser, A. P., Wolfe, C. E., Bryant, J. D., & Spidalieri, A. M. (2014). Effects of the teach-model-coach-review instructional approach on caregiver use of language support strategies and children's expressive language skills. Journal of Speech, Language, and Hearing Research, 57(5), 1851-1869.
956b	Seeking a Valid Gold Standard for an Innovative, Dialect-Neutral Language Test.	Pearson, Barbara Zurer; Jackson, Janice E.; Wu, Haotian	0	2014	1	0		Pearson, B. Z., Jackson, J. E., & Wu, H. (2014). Seeking a valid gold standard for an innovative, dialect-neutral language test. Journal of Speech, Language, and Hearing Research, 57(2), 495-508.
965b	Absolute and Relative Reliability of Percentage of Syllables Stuttered and Severity Rating Scales.	Karimi, Hamid; O'Brian, Sue; Onslow, Mark; Jones, Mark	0	2014	1	0		Karimi, H., O’Brian, S., Onslow, M., & Jones, M. (2014). Absolute and relative reliability of percentage of syllables stuttered and severity rating scales. Journal of Speech, Language, and Hearing Research, 57(4), 1284-1295.
985b	Spatiotemporal Analysis of High-Speed Videolaryngoscopic Imaging of Organic Pathologies in Males.	Bohr, Christopher; Krack, Angelika; Dubrovskiy, Denis; Eysholdt, Ulrich; Svec, Jan; Psychogios, Georgios; Ziethe, Anke; Dollinger, Michael	0	2014	1	0		Bohr, C., Kräck, A., Dubrovskiy, D., Eysholdt, U., Svec, J., Psychogios, G., ... & Döllinger, M. (2014). Spatiotemporal analysis of high-speed videolaryngoscopic imaging of organic pathologies in males. Journal of Speech, Language, and Hearing Research, 57(4), 1148-1161.
987b	Segmental and Prosodic Approaches to Accent Management.	Behrman, Alison	1	2014	0	1		Behrman, A. (2014). Segmental and prosodic approaches to accent management. American Journal of Speech-Language Pathology, 23(4), 546-561.
992b	A Transactional Model of Spoken Vocabulary Variation in Toddlers With Intellectual Disabilities.	Woynaroski, Tiffany; Yoder, Paul J.; Fey, Marc E.; Warren, Steven F.	0	2014	0	1		Woynaroski, T., Yoder, P. J., Fey, M. E., & Warren, S. F. (2014). A transactional model of spoken vocabulary variation in toddlers with intellectual disabilities. Journal of Speech, Language, and Hearing Research, 57(5), 1754-1763.
1004b	Children's Responses to Telegraphic and Grammatically Complete Prompts to Imitate.	Bredin-Oja, Shelley L.; Fey, Marc E.	1	2014	0	1		Bredin-Oja, S. L., & Fey, M. E. (2014). Children's responses to telegraphic and grammatically complete prompts to imitate. American Journal of Speech-Language Pathology.
1006b	A Psychometric Review of Norm-Referenced Tests Used to Assess Phonological Error Patterns.	Kirk, Cecilia; Vigeland, Laura	2	2014	1	0		Kirk, C., & Vigeland, L. (2014). A psychometric review of norm-referenced tests used to assess phonological error patterns. Language, speech, and hearing services in schools, 45(4), 365-377.
1009b	Use of the ADOS for Assessing Spontaneous Expressive Language in Young Children With ASD: A Comparison of Sampling Contexts.	Kover, Sara T.; Davidson, Meghan M.; Sindberg, Heidi A.; Weismer, Susan Ellis	0	2014	1	0		Kover, S. T., Davidson, M. M., Sindberg, H. A., & Weismer, S. E. (2014). Use of the ADOS for assessing spontaneous expressive language in young children with ASD: A comparison of sampling contexts. Journal of Speech, Language, and Hearing Research, 57(6), 2221-2233.
1010b	Nonword Repetition in Children With Cochlear Implants: A Potential Clinical Marker of Poor Language Acquisition.	Nittrouer, Susan; Caldwell-Tarr, Amanda; Sansom, Emily; Twersky, Jill; Lowenstein, Joanna H.	1	2014	1	0		Nittrouer, S., Caldwell-Tarr, A., Sansom, E., Twersky, J., & Lowenstein, J. H. (2014). Nonword repetition in children with cochlear implants: A potential clinical marker of poor language acquisition. American Journal of Speech-Language Pathology, 23(4), 679-695.
1015b	Evaluation of Three Proposed Markers for Language Impairment in English: A Meta- Analysis of Diagnostic Accuracy Studies.	Pawlowska, Monika	0	2014	1	0		Pawłowska, M. (2014). Evaluation of three proposed markers for language impairment in English: A meta-analysis of diagnostic accuracy studies. Journal of Speech, Language, and Hearing Research, 57(6), 2261-2273.
1017b	Ultrasound Visual Feedback Treatment and Practice Variability for Residual Speech Sound Errors.	Preston, Jonathan L.; McCabe, Patricia; Rivera-Campos, Ahmed; Whittle, Jessica L.; Landry, Erik; Maas, Edwin	0	2014	0	1		Preston, J. L., McCabe, P., Rivera-Campos, A., Whittle, J. L., Landry, E., & Maas, E. (2014). Ultrasound visual feedback treatment and practice variability for residual speech sound errors. Journal of Speech, Language, and Hearing Research, 57(6), 2102-2115.
1019b	Development and Content Validation of the Pediatric Eating Assessment Tool (Pedi-EAT)	Thoyre, Suzanne M.; Pados, Britt F.; Jinhee Park; Estrem, Hayley; Hodges, Eric A.; McComish, Cara; Van Riper, Marcia; Murdoch, Kimberly	1	2014	1	0		Thoyre, S. M., Pados, B. F., Park, J., Estrem, H., Hodges, E. A., McComish, C., ... & Murdoch, K. (2014). Development and content validation of the pediatric eating assessment tool (Pedi-EAT). American Journal of Speech-Language Pathology.
1021b	Webcam Delivery of the Lidcombe Program for Early Stuttering: A Phase I Clinical Trial.	O'Brian, Sue; Smith, Kylie; Onslow, Mark	0	2014	0	1		O’Brian, S., Smith, K., & Onslow, M. (2014). Webcam delivery of the Lidcombe Program for early stuttering: A phase I clinical trial. Journal of Speech, Language, and Hearing Research, 57(3), 825-830.
1028b	Impact of Clear, Loud, and Slow Speech on Scaled Intelligibility and Speech Severity in Parkinson's Disease and Multiple Sclerosis.	Tjaden, Kris; Sussman, Joan E.; Wilding, Gregory E.	0	2014	0	1		Tjaden, K., Sussman, J. E., & Wilding, G. E. (2014). Impact of clear, loud, and slow speech on scaled intelligibility and speech severity in Parkinson's disease and multiple sclerosis. Journal of Speech, Language, and Hearing Research, 57(3), 779-792.
1030b	Articulatory Closure Proficiency in Patients With Parkinson's Disease Following Deep Brain Stimulation of the Subthalamic Nucleus and Caudal Zona Incerta.	Karlsson, Fredrik; Olofsson, Katarina; Blomstedt, Patric; Linder, Jan; Nordh, Erik; van Doorn, Jan	0	2014	0	1		Karlsson, F., Olofsson, K., Blomstedt, P., Linder, J., Nordh, E., & van Doorn, J. (2014). Articulatory closure proficiency in patients with Parkinson's disease following deep brain stimulation of the subthalamic nucleus and caudal zona incerta. Journal of Speech, Language, and Hearing Research, 57(4), 1178-1190.
1036b	Data-Driven Subclassification of Speech Sound Disorders in Preschool Children.	Vick, Jennell C.; Campbell, Thomas F.; Shriberg, Lawrence D.; Green, Jordan R.; Truemper, Klaus; Rusiewicz, Heather Leavy; Moore, Christopher A.	0	2014	1	0		Vick, J. C., Campbell, T. F., Shriberg, L. D., Green, J. R., Truemper, K., Rusiewicz, H. L., & Moore, C. A. (2014). Data-driven subclassification of speech sound disorders in preschool children. Journal of Speech, Language, and Hearing Research, 57(6), 2033-2050.
1046b	A Randomized Controlled Trial of an Inference Generation Strategy Intervention for Adults With High-Functioning Autism Spectrum Disorder.	Murza, Kimberly A.; Nye, Chad; Schwartz, Jamie B.; Ehren, Barbara J.; Hahs-Vaughn, Debbie L.	1	2014	0	1		Murza, K. A., Nye, C., Schwartz, J. B., Ehren, B. J., & Hahs-Vaughn, D. L. (2014). A randomized controlled trial of an inference generation strategy intervention for adults with high-functioning autism spectrum disorder. American Journal of Speech-Language Pathology, 23(3), 461-473.
1049b	Vowel Acoustics in Dysarthria: Speech Disorder Diagnosis and Classification.	Lansford, Kaitlin L.; Liss, Julie M.	0	2014	1	0		Lansford, K. L., & Liss, J. M. (2014). Vowel acoustics in dysarthria: Speech disorder diagnosis and classification. Journal of Speech, Language, and Hearing Research.
1053b	Assessing Gestures in Young Children With Autism Spectrum Disorder.	Ellawadi, Allison Bean; Weismer, Susan Ellis	0	2014	1	0		Ellawadi, A. B., & Weismer, S. E. (2014). Assessing gestures in young children with autism spectrum disorder. Journal of Speech, Language, and Hearing Research, 57(2), 524-531.
1063b	Reliability of an Automated High-Resolution Manometry Analysis Program Across Expert Users, Novice Users, and Speech-Language Pathologists.	Jones, Corinne A.; Hoffman, Matthew R.; Zhixian Geng; Abdelhalim, Suzan M.; Jiang, Jack J.; McCulloch, Timothy M.	0	2014	1	0		Jones, C. A., Hoffman, M. R., Geng, Z., Abdelhalim, S. M., Jiang, J. J., & McCulloch, T. M. (2014). Reliability of an automated high-resolution manometry analysis program across expert users, novice users, and speech-language pathologists. Journal of Speech, Language, and Hearing Research, 57(3), 831-836.
1064b	Systematic Individualized Narrative Language Intervention on the Personal Narratives of Children With Autism.	Petersen, Douglas B.; Brown, Catherine L.; Ukrainetz, Teresa A.; Wise, Christine; Spencer, Trina D.; Zebrea, Jennifer; Nippold, Marilyn; Joffe, Victoria	2	2014	0	1		Petersen, D. B., Brown, C. L., Ukrainetz, T. A., Wise, C., Spencer, T. D., & Zebre, J. (2014). Systematic individualized narrative language intervention on the personal narratives of children with autism. Language, Speech, and Hearing Services in Schools, 45(1), 67-86.
1073b	Describing Treatment Intensity in Milieu Teaching Interventions for Children With Developmental Disabilities: A Review.	Parker-McGowan, Quannah; Mo Chen; Reichle, Joe; Pandit, Shivani; Johnson, LeAnne; Kreibich, Shelley	2	2014	0	1		Parker-McGowan, Q., Chen, M., Reichle, J., Pandit, S., Johnson, L., & Kreibich, S. (2014). Describing treatment intensity in milieu teaching interventions for children with developmental disabilities: A review. Language, speech, and hearing services in schools, 45(4), 351-364.
1074b	Combined Aphasia and Apraxia of Speech Treatment (CAAST): Effects of a Novel Therapy.	Wambaugh, Julie L.; Wright, Sandra; Nessler, Christina; Mauszycki, Shannon C.	0	2014	0	1		Wambaugh, J. L., Wright, S., Nessler, C., & Mauszycki, S. C. (2014). Combined aphasia and apraxia of speech treatment (CAAST): Effects of a novel therapy. Journal of Speech, Language, and Hearing Research, 57(6), 2191-2207.
1076b	Classroom-Based Narrative and Vocabulary Instruction: Results of an Early-Stage, Nonrandomized Comparison Study.	Laing Gillam, Sandra; Olszewski, Abbie; Fargo, Jamison; Gillama, Ronald B.; Nippold, Marilyn; Hoffman, LaVae	2	2014	0	1		Gillam, S. L., Olszewski, A., Fargo, J., & Gillam, R. B. (2014). Classroom-based narrative and vocabulary instruction: Results of an early-stage, nonrandomized comparison study. Language, Speech, and Hearing Services in Schools, 45(3), 204-219.
1077b	Webcam Delivery of the Camperdown Program for Adolescents Who Stutter: A Phase II Trial.	Carey, Brenda; O'Brian, Sue; Lowe, Robyn; Onslow, Mark	2	2014	0	1		Carey, B., O'Brian, S., Lowe, R., & Onslow, M. (2014). Webcam delivery of the Camperdown Program for adolescents who stutter: A Phase II trial. Language, speech, and hearing services in schools, 45(4), 314-324.
1081b	Triadic Gaze Intervention for Young Children With Physical Disabilities.	Olswang, Lesley B.; Dowden, Patricia; Feuerstein, Julie; Greenslade, Kathryn; Pinder, Gay Lloyd; Fleming, Kandace	0	2014	0	1		Olswang, L. B., Dowden, P., Feuerstein, J., Greenslade, K., Pinder, G. L., & Fleming, K. (2014). Triadic gaze intervention for young children with physical disabilities. Journal of Speech, Language, and Hearing Research, 57(5), 1740-1753.
1082b	Group Lidcombe Program Treatment for Early Stuttering: A Randomized Controlled Trial.	Arnott, Simone; Onslow, Mark; O'Brian, Sue; Packman, Ann; Jones, Mark; Block, Susan	0	2014	0	1		Arnott, S., Onslow, M., O'Brian, S., Packman, A., Jones, M., & Block, S. (2014). Group Lidcombe program treatment for early stuttering: A randomized controlled trial. Journal of Speech, Language, and Hearing Research, 57(5), 1606-1618.
1085b	Assessing Pragmatic Language in Autism Spectrum Disorder: The Yale in vivo Pragmatic Protocol.	Simmons, Elizabeth Schoen; Paul, Rhea; Volkmar, Fred	0	2014	1	0		Simmons, E. S., Paul, R., & Volkmar, F. (2014). Assessing pragmatic language in autism spectrum disorder: The Yale in vivo pragmatic protocol. Journal of Speech, Language, and Hearing Research, 57(6), 2162-2173.
1092b	Test-Retest Stability of Word Retrieval in Aphasic Discourse.	Boyle, Mary	0	2014	1	0		Boyle, M. (2014). Test–retest stability of word retrieval in aphasic discourse. Journal of Speech, Language, and Hearing Research, 57(3), 966-978.
1097b	Using Randomized Variable Practice in the Treatment of Childhood Apraxia of Speech.	Skelton, Steven L.; Hagopian, Aubrie Lynn	1	2014	0	1		Skelton, S. L., & Hagopian, A. L. (2014). Using randomized variable practice in the treatment of childhood apraxia of speech. American Journal of Speech-Language Pathology, 23(4), 599-611.
1103b	Variability in the Language Input to Children Enhances Learning in a Treatment Context.	Plante, Elena; Ogilvie, Trianna; Vance, Rebecca; Aguilar, Jessica M.; Dailey, Natalie S.; Meyers, Christina; Lieser, Anne Marie; Burton, Rebecca	1	2014	0	1		Plante, E., Ogilvie, T., Vance, R., Aguilar, J. M., Dailey, N. S., Meyers, C., ... & Burton, R. (2014). Variability in the language input to children enhances learning in a treatment context. American Journal of Speech-Language Pathology, 23(4), 530-545.
1108b	Dynamic Assessment of Narrative Ability in English Accurately Identifies Language Impairment in English Language Learners.	Pena, Elizabeth D.; Gillam, Ronald B.; Bedore, Lisa M.	0	2014	1	0		Peña, E. D., Gillam, R. B., & Bedore, L. M. (2014). Dynamic assessment of narrative ability in English accurately identifies language impairment in English language learners. Journal of Speech, Language, and Hearing Research, 57(6), 2208-2220.
1110b	Retroflex Versus Bunched in Treatment for Rhotic Misarticulation: Evidence From Ultrasound Biofeedback Intervention.	Byun, Tara McAllister; Hitchcock, Elaine R.; Swartz, Michelle T.	0	2014	0	1		Byun, T. M., Hitchcock, E. R., & Swartz, M. T. (2014). Retroflex versus bunched in treatment for rhotic misarticulation: Evidence from ultrasound biofeedback intervention. Journal of Speech, Language, and Hearing Research, 57(6), 2116-2130.
1113b	A Differential Item Functioning (DIF) Analysis of the Communicative Participation Item Bank (CPIB): Comparing Individuals With Parkinson's Disease From the United States and New Zealand.	Baylor, Carolyn; McAuliffe, Megan J.; Hughes, Louise E.; Yorkston, Kathryn; Anderson, Tim; Kim, Jiseon; Amtmann, Dagmar	0	2014	1	0		Baylor, C., McAuliffe, M. J., Hughes, L. E., Yorkston, K., Anderson, T., Kim, J., & Amtmann, D. (2014). A differential item functioning (DIF) analysis of the Communicative Participation Item Bank (CPIB): Comparing individuals with Parkinson's disease from the United States and New Zealand. Journal of Speech, Language, and Hearing Research.
1114b	Can Human Mannequin-Based Simulation Provide a Feasible and Clinically Acceptable Method for Training Tracheostomy Management Skills for Speech-Language Pathologists?	Ward, Elizabeth C.; Baker, Sonia C.; Wall, Laurelie R.; Duggan, Brooke L. J.; Hancock, Kelli L.; Bassett, Lynell V.; Hyde, Trent J.	1	2014	0	0	1	Ward, E. C., Baker, S. C., Wall, L. R., Duggan, B. L., Hancock, K. L., Bassett, L. V., & Hyde, T. J. (2014). Can human mannequin-based simulation provide a feasible and clinically acceptable method for training tracheostomy management skills for speech-language pathologists?. American Journal of Speech-Language Pathology, 23(3), 421-436.
1130b	Using Informative Verbal Exchanges to Promote Verb Retrieval in Nonfluent Aphasia.	Maul, Kristen K.; Conner, Peggy S.; Kempler, Daniel; Radvanski, Christina; Goral, Mira	1	2014	0	1		Maul, K. K., Conner, P. S., Kempler, D., Radvanski, C., & Goral, M. (2014). Using informative verbal exchanges to promote verb retrieval in nonfluent aphasia. American journal of speech-language pathology, 23(3), 407-420.
1132b	A Systematic Review of Treatment Outcomes for Children With Childhood Apraxia of Speech.	Murray, Elizabeth; McCabe, Patricia; Ballard, Kirrie J.	1	2014	0	1		Murray, E., McCabe, P., & Ballard, K. J. (2014). A systematic review of treatment outcomes for children with childhood apraxia of speech. American Journal of Speech-Language Pathology, 23(3), 486-504.
1145b	Measuring Phonological Awareness in Deaf and Hard-of-Hearing Children.	Webb, Mi-young L.; Lederberg, Amy R.	0	2014	1	0		Mi-young, L. W., & Lederberg, A. R. (2014). Measuring phonological awareness in deaf and hard-of-hearing children. Journal of Speech, Language, and Hearing Research.
1148b	Three Treatments for Bilingual Children With Primary Language Impairment: Examining Cross-Linguistic and Cross-Domain Effects.	Danahy Ebert, Kerry; Kohnert, Kathryn; Giang Pham; Rentmeester Disher, Jill; Payesteh, Bita	0	2014	0	1		Ebert, K. D., Kohnert, K., Pham, G., Disher, J. R., & Payesteh, B. (2014). Three treatments for bilingual children with primary language impairment: Examining cross-linguistic and cross-domain effects. Journal of Speech, Language, and Hearing Research.
1154b	Effects of Spaced Retrieval Training on Semantic Memory in Alzheimer's Disease: A Systematic Review.	Oren, Shiri; Willerton, Charlene; Small, Jeff	0	2014	0	1		Oren, S., Willerton, C., & Small, J. (2014). Effects of spaced retrieval training on semantic memory in Alzheimer's disease: a systematic review. Journal of Speech, Language, and Hearing Research.
1162b	Sound Production Treatment: Effects of Blocked and Random Practice.	Wambaugh, Julie L.; Nessl, Christina; Wright, Sandra; Mauszycki, Shannon C.	1	2013	0	1		Wambaugh, J. L., Nessler, C., Wright, S., & Mauszycki, S. C. (2014). Sound production treatment: Effects of blocked and random practice. American Journal of Speech-Language Pathology, 23(2), S225-S245.
1172b	Intervention Efficacy and Intensity for Children With Speech Sound Disorder.	Allen, Melissa M.	0	2013	0	1		Allen, M. M. (2013). Intervention efficacy and intensity for children with speech sound disorder. Journal of Speech, Language, and Hearing Research.
1176b	Classroom Phonological Awareness Instruction and Literacy Outcomes in the First Year of School.	Carson, Karyn L.; Gillon, Gail T.; Boustead, Therese M.; Nippold, Marilyn; Troia, Gary	2	2013	0	1		Carson, K. L., Gillon, G. T., & Boustead, T. M. (2013). Classroom phonological awareness instruction and literacy outcomes in the first year of school. Language, Speech, and Hearing Services in Schools.
1181b	Stability of Measures From Children's Interviews: The Effects of Time, Sample Length, and Topic.	Heilmann, John; DeBrock, Lindsay; Chris Riley-Tillman, T.	1	2013	1	0		Heilmann, J., DeBrock, L., & Riley-Tillman, T. C. (2013). Stability of measures from children's interviews: The effects of time, sample length, and topic. American Journal of Speech-Language Pathology.
1184b	Treating Speech Subsystems in Childhood Apraxia of Speech With Tactual Input: The PROMPT Approach.	Dale, Philip S.; Hayden, Deborah A.	1	2013	0	1		Dale, P. S., & Hayden, D. A. (2013). Treating speech subsystems in childhood apraxia of speech with tactual input: The PROMPT approach. American Journal of Speech-Language Pathology.
1188b	Semantic Feature Analysis: Incorporating Typicality Treatment and Mediating Strategy Training to Promote Generalization.	Wambaugh, Julie L.; Mauszycki, Shannon; Cameron, Rosalea; Wright, Sandra; Nessler, Christina	1	2013	0	1		Wambaugh, J. L., Mauszycki, S., Cameron, R., Wright, S., & Nessler, C. (2013). Semantic feature analysis: Incorporating typicality treatment and mediating strategy training to promote generalization. American Journal of Speech-Language Pathology.
1194b	A Motor Speech Assessment for Children With Severe Speech Disorders: Reliability and Validity Evidence.	Strand, Edythe A.; McCauley, Rebecca J.; Weigand, Stephen D.; Stoeckel, Ruth E.; Baas, Becky S.	0	2013	1	0		Strand, E. A., McCauley, R. J., Weigand, S. D., Stoeckel, R. E., & Baas, B. S. (2013). A motor speech assessment for children with severe speech disorders: Reliability and validity evidence. Journal of Speech, Language, and Hearing Research.
1212b	Effects of a Naturalistic Sign Intervention on Expressive Language of Toddlers With Down Syndrome.	Wright, Courtney A.; Kaiser, Ann P.; Reikowsky, Dawn I.; Roberts, Megan Y.	0	2013	0	1		Wright, C. A., Kaiser, A. P., Reikowsky, D. I., & Roberts, M. Y. (2013). Effects of a naturalistic sign intervention on expressive language of toddlers with Down syndrome. Journal of Speech, Language, and Hearing Research.
1213b	The Efficacy of a Vocabulary Intervention for Dual- Language Learners With Language Impairment.	Restrepo, Maria Adelaida; Morgan, Gareth P.; Thompson, Marilyn S.	0	2013	0	1		Restrepo, M. A., Morgan, G. P., & Thompson, M. S. (2013). The efficacy of a vocabulary intervention for dual-language learners with language impairment. Journal of Speech, Language, and Hearing Research.
1217b	The Effects of Behavioral Speech Therapy on Speech Sound Production With Adults Who Have Cochlear Implants.	Pomaville, Frances M.; Kladopoulos, Chris N.	0	2013	0	1		Pomaville, F. M., & Kladopoulos, C. N. (2013). The effects of behavioral speech therapy on speech sound production with adults who have cochlear implants. Journal of Speech, Language, and Hearing Research.
1224b	Enhancing Communication Through Gesture and Naming Therapy.	Caute, Anne; Pring, Tim; Cocks, Naomi; Cruice, Madeline; Best, Wendy; Marshall, Jane	0	2013	0	1		Caute, A., Pring, T., Cocks, N., Cruice, M., Best, W., & Marshall, J. (2013). Enhancing communication through gesture and naming therapy. Journal of Speech, Language, and Hearing Research.
1227b	Discriminating Children With Language Impairment Among English-Language Learners From Diverse First-Language Backgrounds.	Paradis, Johanne; Schneider, Phyllis; Duncan, Tamara Sorenson	0	2013	1	0		Paradis, J., Schneider, P., & Duncan, T. S. (2013). Discriminating children with language impairment among English-language learners from diverse first-language backgrounds. Journal of Speech, Language, and Hearing Research.
1231b	A Comparison of Computerized and Paper-Based Language Tests With Adults With Aphasia.	Newton, Caroline; Acres, Kadia; Bruce, Carolyn	1	2013	1	0		Newton, C., Acres, K., & Bruce, C. (2013). A comparison of computerized and paper-based language tests with adults with aphasia. American Journal of Speech-Language Pathology.
1233b	Rehabilitation in Bilingual Aphasia: Evidence for Within- and Between-Language Generalization.	Kiran, Swathi; Sandberg, Chaleece; Gray, Teresa; Ascenso, Elsa; Kester, Ellen	1	2013	0	1		Kiran, S., Sandberg, C., Gray, T., Ascenso, E., & Kester, E. (2013). Rehabilitation in bilingual aphasia: evidence for within-and between-language generalization. American journal of speech-language pathology.
1236b	Alternative Tense and Agreement Morpheme Measures for Assessing Grammatical Deficits During the Preschool Period.	Gladfelter, Allison; Leonard, Laurence B.	0	2013	1	0		Gladfelter, A., & Leonard, L. B. (2013). Alternative tense and agreement morpheme measures for assessing grammatical deficits during the preschool period. Journal of Speech, Language, and Hearing Research.
1246b	Ultrasound Biofeedback Treatment for Persisting Childhood Apraxia of Speech.	Preston, Jonathan L.; Brick, Nickole; Landi, Nicole	1	2013	0	1		Preston, J. L., Brick, N., & Landi, N. (2013). Ultrasound biofeedback treatment for persisting childhood apraxia of speech. American Journal of Speech-Language Pathology.
1250b	Unscheduled Telephone Calls to Measure Percent Syllables Stuttered During Clinical Trials.	Karimi, Hamid; O'Brian, Sue; Onslow, Mark; Jones, Mark; Menzies, Ross; Packman, Ann	0	2013	1	0		Karimi, H., O'Brian, S., Onslow, M., Jones, M., Menzies, R., & Packman, A. (2013). Unscheduled telephone calls to measure percent syllables stuttered during clinical trials. Journal of Speech, Language, and Hearing Research.
1257b	An Analysis of Aphasic Naming Errors as an Indicator of Improved Linguistic Processing Following Phonomotor Treatment.	Kendall, Diane L.; Hunting Pompon, Rebecca; Brookshire, C. Elizabeth; Minkina, Irene; Bislick, Lauren	1	2013	0	1		Kendall, D. L., Pompon, R. H., Brookshire, C. E., Minkina, I., & Bislick, L. (2013). An analysis of aphasic naming errors as an indicator of improved linguistic processing following phonomotor treatment. American Journal of Speech-Language Pathology.
1261b	Dosing of a Cued Picture-Naming Treatment for Anomia.	Harnish, Stacy M.; Morgan, Jodi; Lundine, Jennifer P.; Bauer, Andrew; Singletary, Floris; Benjamin, Michelle L.; Gonzalez Rothi, Leslie J.; Crosson, Bruce	1	2013	0	1		Harnish, S. M., Morgan, J., Lundine, J. P., Bauer, A., Singletary, F., Benjamin, M. L., ... & Crosson, B. (2014). Dosing of a cued picture-naming treatment for anomia. American Journal of Speech-Language Pathology, 23(2), S285-S299.
1269b	Toward Validation of a Minimal Competence Core of Morphosyntax for African American Children.	Stockman, Ida J.; Guillory, Barbara; Seibert, Marilyn; Boultd, Johanna	1	2013	1	0		Stockman, I. J., Guillory, B., Seibert, M., & Boult, J. (2013). Toward validation of a minimal competence core of morphosyntax for African American children. American Journal of Speech-Language Pathology.
1275b	Integrated Training for Aphasia: An Application of Part-Whole Learning to Treat Lexical Retrieval, Sentence Production, and Discourse-Level Communications in Three Cases of Nonfluent Aphasia.	Milman, Lisa; Vega-Mendoza, Mariana; Clendenen, Deanna	1	2013	0	1		Milman, L., Vega-Mendoza, M., & Clendenen, D. (2014). Integrated training for aphasia: An application of part–whole learning to treat lexical retrieval, sentence production, and discourse-level communications in three cases of nonfluent aphasia. American Journal of Speech-Language Pathology, 23(2), 105-119.
1276b	Examining the Construct Validity of the V-RQOL in Speakers Who Use Alaryngeal Voice.	Bornbaum, Catherine C.; Day, Adam M. B.; Doyle, Philip C.	1	2013	1	0		Bornbaum, C. C., Day, A. M., & Doyle, P. C. (2014). Examining the construct validity of the V-RQOL in speakers who use alaryngeal voice. American journal of speech-language pathology, 23(2), 196-202.
1279b	Is More Better? Milieu Communication Teaching in Toddlers With Intellectual Disabilities.	Fey, Marc E.; Yoder, Paul J.; Warren, Steven F.; Bredin-Oja, Shelley L.	0	2013	0	1		Fey, M. E., Yoder, P. J., Warren, S. F., & Bredin-Oja, S. L. (2013). Is more better? Milieu communication teaching in toddlers with intellectual disabilities. Journal of Speech, Language, and Hearing Research.
1287b	Morphological Awareness Intervention With Kindergartners and First- and Second-Grade Students From Low Socioeconomic Status Homes: A Feasibility Study.	Apel, Kenn; Brimo, Danielle; Diehm, Emily; Apela, Lynda; Nippold, Marilyn; Marinellie, Sally	2	2013	0	1		Apel, K., Brimo, D., Diehm, E., & Apel, L. (2013). Morphological awareness intervention with kindergartners and first-and second-grade students from low socioeconomic status homes: A feasibility study. Language, Speech, and Hearing Services in Schools.
1295b	Acquisition and Maintenance of Scripts in Aphasia: A Comparison of Two Cuing Conditions.	Cherney, Leora R.; Kaye, Rosalind C.; van Vuuren, Sarel	1	2013	0	1		Cherney, L. R., Kaye, R. C., & van Vuuren, S. (2014). Acquisition and maintenance of scripts in aphasia: A comparison of two cuing conditions. American Journal of Speech-Language Pathology, 23(2), S343-S360.
1298b	Modified Response Elaboration Training: Application to Procedural Discourse and Personal Recounts.	Wambaugh, Julie L.; Nessler, Christina; Wright, Sandra	1	2013	0	1		Wambaugh, J. L., Nessler, C., & Wright, S. (2013). Modified response elaboration training: Application to procedural discourse and personal recounts. American Journal of Speech-Language Pathology.
1299b	Classification Accuracy of Nonword Repetition When Used With Preschool-Age Spanish-Speaking Children.	Guiberson, Mark; Rodriguez, Barbara L.; Nippold, Marilyn; Troia, Gary	2	2013	1	0		Guiberson, M., & Rodríguez, B. L. (2013). Classification accuracy of nonword repetition when used with preschool-age Spanish-speaking children. Language, Speech, and Hearing Services in Schools.
1300b	Pitch Variability in Patients With Parkinson's Disease: Effects of Deep Brain Stimulation of Caudal Zona Incerta and Subthalamic Nucleus.	Karlsson, Fredrik; Olofsson, Katarina; Blomstedt, Patric; Linder, Jan; van Doorn, Jan	0	2013	0	1		Karlsson, F., Olofsson, K., Blomstedt, P., Linder, J., & van Doorn, J. (2013). Pitch variability in patients with Parkinson’s disease: Effects of deep brain stimulation of caudal zona incerta and subthalamic nucleus. Journal of Speech, Language, and Hearing Research.
1301b	An Evidence-Based Systematic Review on Communication Treatments for Individuals With Right Hemisphere Brain Damage.	Blake, Margaret Lehman; Frymark, Tobi; Venedictov, Rebecca	1	2013	0	1		Blake, M. L., Frymark, T., & Venedictov, R. (2013). An evidence-based systematic review on communication treatments for individuals with right hemisphere brain damage. American Journal of Speech-Language Pathology.
1302b	Effect of Verb Network Strengthening Treatment (VNeST) in Persons With Aphasia: Extension and Replication of Previous Findings.	Edmonds, Lisa A.; Mammino, Kevin; Ojeda, Jimena	1	2013	0	1		Edmonds, L. A., Mammino, K., & Ojeda, J. (2014). Effect of Verb Network Strengthening Treatment (VNeST) in persons with aphasia: Extension and replication of previous findings. American Journal of Speech-Language Pathology, 23(2), S312-S329.
1303b	An Evidence-Based Systematic Review on Cognitive Interventions for Individuals With Dementia.	Hopper, Tammy; Bourgeois, Michelle; Pimentel, Jane; Qualls, Constance Dean; Hickey, Ellen; Frymark, Tobi; Schooling, Tracy	1	2013	0	1		Hopper, T., Bourgeois, M., Pimentel, J., Qualls, C. D., Hickey, E., Frymark, T., & Schooling, T. (2013). An evidence-based systematic review on cognitive interventions for individuals with dementia. American Journal of Speech-Language Pathology.
1304b	The Communicative Participation Item Bank (CPIB): Item Bank Calibration and Development of a Disorder-Generic Short Form.	Baylor, Carolyn; Yorkston, Kathryn; Eadie, Tanya; Jiseon Kim; Hyewon Chung; Amtmann, Dagmar	0	2013	1	0		Baylor, C., Yorkston, K., Eadie, T., Kim, J., Chung, H., & Amtmann, D. (2013). The Communicative Participation Item Bank (CPIB): Item bank calibration and development of a disorder-generic short form. Journal of Speech, Language, and Hearing Research.
1305b	Parent-Implemented Enhanced Milieu Teaching With Preschool Children Who Have Intellectual Disabilities.	Kaiser, Roberts	0	2013	0	1		Kaiser, A. P., & Roberts, M. Y. (2013). Parent-implemented enhanced milieu teaching with preschool children who have intellectual disabilities. Journal of Speech, Language, and Hearing Research.
1310b	Treatment for Acquired Apraxia of Speech: Examination of Treatment Intensity and Practice Schedule.	Wambaugh, Julie L.; Nessler, Christina; Cameron, Rosalea; Mauszycki, Shannon C.	1	2013	0	1		Wambaugh, J. L., Nessler, C., Cameron, R., & Mauszycki, S. C. (2013). Treatment for acquired apraxia of speech: Examination of treatment intensity and practice schedule. American Journal of Speech-Language Pathology.
1314b	The Diagnostic Accuracy of Two Tense Measures for Identifying 3-Year-Olds With Language Impairment.	Ling-Yu Guo; Eisenberg, Sarita	1	2014	1	0		Guo, L. Y., & Eisenberg, S. (2014). The diagnostic accuracy of two tense measures for identifying 3-year-olds with language impairment. American Journal of Speech-Language Pathology, 23(2), 203-212.
1321b	Pragmatic Language Assessment in Williams Syndrome: A Comparison of the Test of Pragmatic Language-2 and the Children's Communication Checklist-2.	Hoffmann, Anne; Martens, Marilee A.; Fox, Robert; Rabidoux, Paula; Andridge, Rebecca	1	2013	1	0		Hoffmann, A., Martens, M. A., Fox, R., Rabidoux, P., & Andridge, R. (2013). Pragmatic Language Assessment in Williams Syndrome: A Comparison of the Test of Pragmatic Language—2 and the Children's Communication Checklist—2. American Journal of Speech-Language Pathology.
1322b	The Relation of Linguistic Awareness and Vocabulary to Word Reading and Spelling for First-Grade Students Participating in Response to Intervention.	Young-Suk Kim; Apel, Kenn; Al Otaiba, Stephanie; Nippold, Marilyn; Joffe, Victoria	2	2013	0	1		Kim, Y. S., Apel, K., & Al Otaiba, S. (2013). The relation of linguistic awareness and vocabulary to word reading and spelling for first-grade students participating in response to intervention. Language, speech, and hearing services in schools.
1325b	Evidence-Based Clinical Voice Assessment: A Systematic Review.	Roy, Nelson; Barkmeier-Kraemer, Julie; Eadie, Tanya; Preeti Sivasankar, M.; Mehta, Daryush; Paul, Diane; Hillman, Robert	1	2013	1	0		Roy, N., Barkmeier-Kraemer, J., Eadie, T., Sivasankar, M. P., Mehta, D., Paul, D., & Hillman, R. (2013). Evidence-based clinical voice assessment: a systematic review. American Journal of Speech-Language Pathology.
1327b	Measuring Lexical Diversity in Narrative Discourse of People With Aphasia.	Fergadiotis, Gerasimos; Wright, Heather H.; West, Thomas M.	1	2013	1	0		Fergadiotis, G., Wright, H. H., & West, T. M. (2013). Measuring lexical diversity in narrative discourse of people with aphasia. American Journal of Speech-Language Pathology.
1328b	Evaluation of Attention Training and Metacognitive Facilitation to Improve Reading Comprehension in Aphasia.	Lee, Jaime B.; Moore Sohlberg, McKay	1	2013	0	1		Lee, J. B., & Sohlberg, M. M. (2013). Evaluation of attention training and metacognitive facilitation to improve reading comprehension in aphasia. American Journal of Speech-Language Pathology.
1330b	What People Living With Aphasia Think About the Availability of Aphasia Resources.	Hinckley, Jacqueline J.; Hasselkus, Amy; Ganzfried, Ellayne	1	2013	0	1		Hinckley, J. J., Hasselkus, A., & Ganzfried, E. (2013). What people living with aphasia think about the availability of aphasia resources. American Journal of Speech-Language Pathology.
1334b	Differentiating Children With and Without Language Impairment Based on Grammaticality.	Eisenberg, Sarita L.; Guo, Ling-Yu	2	2013	1	0		Eisenberg, S. L., & Guo, L. Y. (2013). Differentiating children with and without language impairment based on grammaticality. Language, Speech, and Hearing Services in Schools.
1339b	Development and Validation of the Spanish--English Language Proficiency Scale (SELPS).	Smyk, Ekaterina; Restrepo, M. Adelaida; Gorin, Joanna S.; Gray, Shelley	2	2013	1	0		Smyk, E., Restrepo, M. A., Gorin, J. S., & Gray, S. (2013). Development and validation of the Spanish–English language proficiency scale (SELPS). Language, Speech, and Hearing Services in Schools.
1341b	Treatment of Proper Name Retrieval Deficits in an Individual With Temporal Lobe Epilepsy.	Minkina, Irene; Ojemann, Jeffrey G.; Grabowski, Thomas J.; Silkes, JoAnn P.; Phatak, Vaishali; Kendall, Diane L.	1	2013	0	1		Minkina, I., Ojemann, J. G., Grabowski, T. J., Silkes, J. P., Phatak, V., & Kendall, D. L. (2013). Treatment of proper name retrieval deficits in an individual with temporal lobe epilepsy. American journal of speech-language pathology.
1348b	Severe Speech Sound Disorders: An Integrated Multimodal Intervention.	King, Amie M.; Hengst, Julie A.; DeThorne, Laura S.; Nippold, Marilyn; Reichle, Joe	2	2013	0	1		King, A. M., Hengst, J. A., & DeThorne, L. S. (2013). Severe speech sound disorders: An integrated multimodal intervention. Language, Speech, and Hearing Services in Schools.
1355b	Error Variability and the Differentiation Between Apraxia of Speech and Aphasia With Phonemic Paraphasia.	Haley, Katarina L.; Jacks, Adam; Cunningham, Kevin T.	0	2013	1	0		Haley, K. L., Jacks, A., & Cunningham, K. T. (2013). Error variability and the differentiation between apraxia of speech and aphasia with phonemic paraphasia. Journal of Speech, Language, and Hearing Research.
1356b	Description of an Intensive Residential Aphasia Treatment Program: Rationale, Clinical Processes, and Outcomes.	Winans-Mitrik, Ronda L.; Hula, William D.; Dickey, Michael W.; Schumacher, James G.; Swoyer, Brooke; Doyle, Patrick J.	1	2014	0	1		Winans-Mitrik, R. L., Hula, W. D., Dickey, M. W., Schumacher, J. G., Swoyer, B., & Doyle, P. J. (2014). Description of an intensive residential aphasia treatment program: Rationale, clinical processes, and outcomes. American Journal of Speech-Language Pathology, 23(2), S330-S342.
1357b	Identification of Specific Language Impairment in Bilingual Children: I. Assessment in English.	Gillam, Ronald B.; Peña, Elizabeth D.; Bedore, Lisa M.; Bohman, Thomas M.; Mendez-Perez, Anita	0	2013	1	0		Gillam, R. B., Peña, E. D., Bedore, L. M., Bohman, T. M., & Mendez-Perez, A. (2013). Identification of specific language impairment in bilingual children: I. Assessment in English. Journal of Speech, Language, and Hearing Research.
1363b	Assessment of Stigma Associated With Stuttering: Development and Evaluation of the Self-Stigma of Stuttering Scale (4S).	Boyle, Michael P.	0	2013	1	0		Boyle, M. P. (2013). Assessment of stigma associated with stuttering: Development and evaluation of the self-stigma of stuttering scale (4S). Journal of Speech, Language, and Hearing Research.
1373b	The Association Between Expressive Grammar Intervention and Social and Emergent Literacy Outcomes for Preschoolers With SLI.	Washington, Karla N.	1	2013	0	1		Washington, K. N. (2013). The association between expressive grammar intervention and social and emergent literacy outcomes for preschoolers with SLI. American Journal of Speech-Language Pathology.
1374b	Behavioral Stuttering Interventions for Children and Adolescents: A Systematic Review and Meta-Analysis.	Nye, Chad; Vanryckeghem, Martine; Schwartz, Jamie B.; Herder, Carl; Turner III, Herbert M.; Howard, Courtney	0	2013	0	1		Nye, C., Vanryckeghem, M., Schwartz, J. B., Herder, C., TurnerIII, H. M., & Howard, C. (2013). Behavioral stuttering interventions for children and adolescents: A systematic review and meta-analysis. Journal of Speech, Language, and Hearing Research.
1389b	A Systematic Review of Assessments for Identifying Executive Function Impairment in Adults With Acquired Brain Injury.	Mueller, Jana A.; Dollaghan, Christine	0	2013	1	0		Mueller, J. A., & Dollaghan, C. (2013). A systematic review of assessments for identifying executive function impairment in adults with acquired brain injury. Journal of Speech, Language, and Hearing Research.
1390b	Tense Marking and Spontaneous Speech Measures in Spanish Specific Language Impairment: A Discriminant Function Analysis.	Grinstead, John; Baron, Alisa; Vega-Mendoza, Mariana; De la Mora, Juliana; Cantú-Sánchez, Myriam; Flores, Blanca	0	2013	1	0		Grinstead, J., Baron, A., Vega-Mendoza, M., De la Mora, J., Cantú-Sánchez, M., & Flores, B. (2013). Tense marking and spontaneous speech measures in Spanish specific language impairment: A discriminant function analysis. Journal of Speech, Language, and Hearing Research.
1391b	Increasing Social Interaction Using Prelinguistic Milieu Teaching With Nonverbal School-Age Children With Autism.	Franco, Jessica H.; Davis, Barbara L.; Davis, John L.	1	2013	0	1		Franco, J. H., Davis, B. L., & Davis, J. L. (2013). Increasing social interaction using prelinguistic milieu teaching with nonverbal school-age children with autism. American Journal of Speech-Language Pathology.
1393b	Writing Treatment for Aphasia: A Texting Approach.	Beeson, Palagie M.; Higginson, Kristina; Rising, Kindle	0	2013	0	1		Beeson, P. M., Higginson, K., & Rising, K. (2013). Writing treatment for aphasia: A texting approach. Journal of Speech, Language, and Hearing Research.
1394b	Real-Word and Nonword Repetition in Italian-Speaking Children With Specific Language Impairment: A Study of Diagnostic Accuracy.	Dispaldro, Marco; Leonard, Laurence B.; Deevy, Patricia	0	2013	1	0		Dispaldro, M., Leonard, L. B., & Deevy, P. (2013). Real-word and nonword repetition in Italian-speaking children with specific language impairment: A study of diagnostic accuracy. Journal of Speech, Language, and Hearing Research.
1395b	Effects of Intensive Phonomotor Treatment on Reading in Eight Individuals With Aphasia and Phonological Alexia.	Brookshire, C. Elizabeth; Conway, Tim; Pompon, Rebecca Hunting; Oelke, Megan; Kendall, Diane L.	1	2014	0	1		Brookshire, C. E., Conway, T., Pompon, R. H., Oelke, M., & Kendall, D. L. (2014). Effects of intensive phonomotor treatment on reading in eight individuals with aphasia and phonological alexia. American Journal of Speech-Language Pathology, 23(2), S300-S311.
1412b	Language Use in Social Interactions of School-Age Children With Language Impairments: An Evidence-Based Systematic Review of Treatment.	Gerber, Sima; Brice, Alejandro; Capone, Nina; Fujiki, Martin; Timler, Geralyn	2	2012	0	1		Gerber, S., Brice, A., Capone, N., Fujiki, M., & Timler, G. (2012). Language use in social interactions of school-age children with language impairments: An evidence-based systematic review of treatment. Language, Speech, and Hearing Services in Schools.
1414b	The Effects of Modified Melodic Intonation Therapy on Nonfluent Aphasia: A Pilot Study.	Conklyn, Dwyer; Novak, Eric; Boissy, Adrienne; Bethoux, Francois; Chemali, Kamal; Smith, Anne; Ziegler, Wolfram	0	2012	0	1		Conklyn, D., Novak, E., Boissy, A., Bethoux, F., & Chemali, K. (2012). The effects of modified melodic intonation therapy on nonfluent aphasia: A pilot study. Journal of Speech, Language, and Hearing Research.
1419b	Monitoring Progress in Vocal Development in Young Cochlear Implant Recipients: Relationships Between Speech Samples and Scores From the Conditioned Assessment of Speech Production (CASP).	Ertmer, David J.; Jongmin Jung	1	2012	1	0		Ertmer, D. J., & Jung, J. (2012). Monitoring progress in vocal development in young cochlear implant recipients: Relationships between speech samples and scores from the Conditioned Assessment of Speech Production (CASP). American journal of speech-language pathology.
1420b	Vocal Fold Phase Asymmetries in Patients With Voice Disorders: A Study Across Visualization Techniques.	Bonilha, Heather Shaw; Deliyski, Dimitar D.; Whiteside, Joanna Piasecki; Gerlach, Terri Treman	1	2012	1	0		Bonilha, H. S., Deliyski, D. D., Whiteside, J. P., & Gerlach, T. T. (2012). Vocal fold phase asymmetries in patients with voice disorders: a study across visualization techniques. American Journal of Speech-Language Pathology.
1423b	Written Narrative Characteristics in Adults With Language Impairment.	Suddarth, Rachael; Plante, Elena; Vance, Rebecca	0	2012	1	0		Suddarth, R., Plante, E., & Vance, R. (2012). Written narrative characteristics in adults with language impairment. Journal of Speech, Language, and Hearing Research.
1427b	Dynamic Assessment of Word Learning Skills: Identifying Language Impairment in Bilingual Children.	Kapantzoglou, Maria; Restrepo, M. Adelaida; Thompson, Marilyn S.	2	2012	1	0		Kapantzoglou, M., Restrepo, M. A., & Thompson, M. S. (2012). Dynamic assessment of word learning skills: Identifying language impairment in bilingual children. Language, Speech, and Hearing Services in Schools.
1431b	Feedback Frequency in Treatment for Childhood Apraxia of Speech.	Maas, Edwin; Butalla, Christine E.; Farinella, Kimberly A.	1	2012	0	1		Maas, E., Butalla, C. E., & Farinella, K. A. (2012). Feedback frequency in treatment for childhood apraxia of speech. American Journal of Speech-Language Pathology.
1432b	A Comparison of Developmental Social--Pragmatic and Naturalistic Behavioral Interventions on Language Use and Social Engagement in Children With Autism.	Ingersoll, Brooke; Meyer, Katherine; Bonter, Nicole; Jelinek, Sara; Oetting, Janna; Lord, Catherine	0	2012	0	1		Ingersoll, B., Meyer, K., Bonter, N., & Jelinek, S. (2012). A comparison of developmental social–pragmatic and naturalistic behavioral interventions on language use and social engagement in children with autism. Journal of Speech, Language, and Hearing Research.
1434b	Acquired Apraxia of Speech: The Effects of Repeated Practice and Rate/Rhythm Control Treatments on Sound Production Accuracy.	Wambaugh, Julie L.; Nessler, Christina; Cameron, Rosalea; Mauszycki, Shannon C.	1	2012	0	1		Wambaugh, J. L., Nessler, C., Cameron, R., & Mauszycki, S. C. (2012). Acquired apraxia of speech: The effects of repeated practice and rate/rhythm control treatments on sound production accuracy. American Journal of Speech-Language Pathology.
1449b	Gesture and Naming Therapy for People With Severe Aphasia: A Group Study.	Marshall, Jane; Best, Wendy; Cocks, Naomi; Cruice, Madeline; Pring, Tim; Bulcock, Gemma; Creek, Gemma; Eales, Nancy; Mummery, Alice Lockhart; Matthews, Niina; Cautea, Anna	0	2012	0	1		Marshall, J., Best, W., Cocks, N., Cruice, M., Pring, T., Bulcock, G., ... & Caute, A. (2012). Gesture and naming therapy for people with severe aphasia: A group study. Journal of Speech, Language, and Hearing Research.
1452b	Communication-Based Assessment of Developmental Age for Young Children With Developmental Disabilities.	DeVeney, Shari L.; Hoffman, Lesa; Cress, Cynthia J.	0	2012	1	0		DeVeney, S. L., Hoffman, L., & Cress, C. J. (2012). Communication-based assessment of developmental age for young children with developmental disabilities. Journal of Speech, Language, and Hearing Research.
1466b	Development of a Theoretically Based Treatment for Sentence Comprehension Deficits in Individuals With Aphasia.	Kiran, Swathi; Caplan, David; Sandberg, Chaleece; Levy, Joshua; Berardino, Alex; Ascenso, Elsa; Villard, Sarah; Tripodis, Yorghos	1	2012	0	1		Kiran, S., Caplan, D., Sandberg, C., Levy, J., Berardino, A., Ascenso, E., ... & Tripodis, Y. (2012). Development of a theoretically based treatment for sentence comprehension deficits in individuals with aphasia. American Journal of Speech-Language Pathology.
1473b	Short-Form Philadelphia Naming Test: Rationale and Empirical Evaluation.	Walker, Grant M.; Schwartz, Myrna F.	1	2012	1	0		Walker, G. M., & Schwartz, M. F. (2012). Short-form Philadelphia naming test: Rationale and empirical evaluation. American Journal of Speech-Language Pathology.
1490b	Application of Classification Models to Pharyngeal High-Resolution Manometry.	Mielens, Jason D.; Hoffman, Matthew R.; Ciucci, Michelle R.; McCulloch, Timothy M.; Jianga, Jack J.	0	2012	1	0		Mielens, J. D., Hoffman, M. R., Ciucci, M. R., McCulloch, T. M., & Jiang, J. J. (2012). Application of classification models to pharyngeal high-resolution manometry. Journal of Speech, Language, and Hearing Research.
1508b	Innovative Technology for the Assisted Delivery of Intensive Voice Treatment (LSVTLOUD) for Parkinson Disease.	Halpern, Angela E.; Ramig, Lorraine O.; Matos, Carlos E. C.; Petska-Cable, Jill A.; Spielman, Jennifer L.; Pogoda, Janice M.; Gilley, Phillip M.; Sapir, Shimon; Bennett, John K.; McFarland, David H.	1	2012	0	1		Halpern, A. E., Ramig, L. O., Matos, C. E., Petska-Cable, J. A., Spielman, J. L., Pogoda, J. M., ... & McFarland, D. H. (2012). Innovative technology for the assisted delivery of intensive voice treatment (LSVT® LOUD) for Parkinson disease. American Journal of Speech-Language Pathology.
1511b	Linking Outcomes From Peabody Picture Vocabulary Test Forms Using Item Response Models.	Hoffman, Lesa; Templin, Jonathan; Rice, Mabel L.	0	2012	1	0		Hoffman, L., Templin, J., & Rice, M. L. (2012). Linking outcomes from Peabody Picture Vocabulary Test forms using item response models. Journal of Speech, Language, and Hearing Research.
1515b	Language Outcomes of Contextualized and Decontextualized Language Intervention: Results of an Early Efficacy Study.	Gillam, Sandra Laing; Gillam, Ronald B.; Reece, Kellie; Nippold, Marilyn; Schneider, Phyllis	2	2012	0	1		Gillam, S. L., Gillam, R. B., & Reece, K. (2012). Language outcomes of contextualized and decontextualized language intervention: Results of an early efficacy study. Language, speech, and hearing services in schools.
1516b	The Effect of Test Presentation on Children With Autism Spectrum Disorders and Neurotypical Peers.	Alt, Mary; Moreno, Melanie Humphrey	2	2012	1	0		Alt, M., & Moreno, M. H. (2012). The effect of test presentation on children with autism spectrum disorders and neurotypical peers. Language, speech, and hearing services in schools.
1523b	Intensive Voice Treatment (LSVT LOUD) for Children With Spastic Cerebral Palsy and Dysarthria.	Fox, Cynthia Marie; Boliek, Carol Ann	0	2012	0	1		Fox, C. M., & Boliek, C. A. (2012). Intensive voice treatment (LSVT LOUD) for children with spastic cerebral palsy and dysarthria. Journal of Speech, Language, and Hearing Research.
1526b	Assessing the Effects of a Parent-Implemented Language Intervention for Children With Language Impairments Using Empirical Benchmarks: A Pilot Study.	Roberts, Megan Y.; Kaiser, Ann P.; Oetting, Janna; Hadley, Pamela	0	2012	0	1		Roberts, M. Y., & Kaiser, A. P. (2012). Assessing the effects of a parent-implemented language intervention for children with language impairments using empirical benchmarks: A pilot study. Journal of Speech, Language, and Hearing Research.
1533b	Syllable-Timed Speech Treatment for School-Age Children Who Stutter: A Phase I Trial.	Andrews, Cheryl; O'Brian, Sue; Harrison, Elisabeth; Onslow, Mark; Packman, Ann; Menzies, Ross; Nippold, Marilyn; Schwarz, Ilsa	2	2012	0	1		Andrews, C., O’Brian, S., Harrison, E., Onslow, M., Packman, A., & Menzies, R. (2012). Syllable-timed speech treatment for school-age children who stutter: A phase I trial. Language, Speech, and Hearing Services in Schools.
1539b	Webcam Delivery of the Camperdown Program for Adolescents Who Stutter: A Phase I Trial.	Carey, Brenda; O'Brian, Sue; Onslow, Mark; Packman, Ann; Menzies, Ross; Nippold, Marilyn; Schwarz, Ilsa	2	2012	0	1		Carey, B., O’Brian, S., Onslow, M., Packman, A., & Menzies, R. (2012). Webcam delivery of the Camperdown Program for adolescents who stutter: A Phase I trial. Language, Speech, and Hearing Services in Schools.
1550b	Training Secondary School Teachers in Instructional Language Modification Techniques to Support Adolescents With Language Impairment: A Randomized Controlled Trial.	Starling, Julia; Munro, Natalie; Togher, Leanne; Arciuli, Joanne	2	2012	0	1		Starling, J., Munro, N., Togher, L., & Arciuli, J. (2012). Training secondary school teachers in instructional language modification techniques to support adolescents with language impairment: A randomized controlled trial. Language, speech, and hearing services in schools.
1551b	Facilitating Emergent Literacy: Efficacy of a Model That Partners Speech-Language Pathologists and Educators.	Girolametto, Luigi; Weitzman, Elaine; Greenberg, Janice	1	2012	0	1		Girolametto, L., Weitzman, E., & Greenberg, J. (2012). Facilitating emergent literacy: Efficacy of a model that partners speech-language pathologists and educators. American Journal of Speech-Language Pathology.
1553b	Word-Finding Intervention for Children With Specific Language Impairment: A Multiple Single-Case Study.	Bragard, Anne; Schelstraete, Marie-Anne; Snyers, Perrine; James, Deborah G. H.	2	2012	0	1		Bragard, A., Schelstraete, M. A., Snyers, P., & James, D. G. (2012). Word-finding intervention for children with specific language impairment: A multiple single-case study. Language, Speech, and Hearing Services in Schools.
1560b	Predictors of Second Language Acquisition in Latino Children With Specific Language Impairment.	Gutierrez-Clellen, Vera; Simon-Cereijido, Gabriela; Sweet, Monica	1	2012	0	1		Gutiérrez-Clellen, V., Simon-Cereijido, G., & Sweet, M. (2012). Predictors of second language acquisition in Latino children with specific language impairment. American Journal of Speech-Language Pathology.
1570b	Model Choice and Sample Size in Item Response Theory Analysis of Aphasia Tests.	Hula, William D.; Fergadiotis, Gerasimos; Martin, Nadine	1	2012	1	0		Hula, W. D., Fergadiotis, G., & Martin, N. (2012). Model choice and sample size in item response theory analysis of aphasia tests. American Journal of Speech-Language Pathology.
1572b	Random Versus Blocked Practice in Treatment for Childhood Apraxia of Speech.	Maas, Edwin; Farinella, Kimberly A.	0	2012	0	1		Maas, E., & Farinella, K. A. (2012). Random versus blocked practice in treatment for childhood apraxia of speech. Journal of Speech, Language, and Hearing Research.
1574b	A Comparison of Intention and Pantomime Gesture Treatment for Noun Retrieval in People With Aphasia.	Ferguson, Neina F.; Evans, Kelli; Raymer, Anastasia M.	1	2012	0	1		Ferguson, N. F., Evans, K., & Raymer, A. M. (2012). A comparison of intention and pantomime gesture treatment for noun retrieval in people with aphasia. American Journal of Speech-Language Pathology.
1575b	The Intelligibility in Context Scale: Validity and Reliability of a Subjective Rating Measure.	McLeod, Sharynne; Harrison, Linda J.; McCormack, Jane	0	2012	1	0		McLeod, S., Harrison, L. J., & McCormack, J. (2012). The intelligibility in context scale: Validity and reliability of a subjective rating measure. Journal of Speech, Language, and Hearing Research.
1594b	Investigating the Use of Traditional and Spectral Biofeedback Approaches to Intervention for /r/ Misarticulation.	Byun, Tara McAllister; Hitchcock, Elaine R.	1	2012	0	1		Byun, T. M., & Hitchcock, E. R. (2012). Investigating the use of traditional and spectral biofeedback approaches to intervention for/r/misarticulation. American Journal of Speech-Language Pathology.
1597b	Predicting Later Language Outcomes From the Language Use Inventory.	Pesco, Diane; O'Neill, Daniela K.	0	2012	1	0		Pesco, D., & O’Neill, D. K. (2012). Predicting later language outcomes from the Language Use Inventory. Journal of Speech, Language, and Hearing Research.
1599b	Script Training and Generalization for People With Aphasia.	Goldberg, Samantha; Haley, Katarina L.; Jacks, Adam	1	2012	0	1		Goldberg, S., Haley, K. L., & Jacks, A. (2012). Script training and generalization for people with aphasia. American Journal of Speech-Language Pathology.
1602b	Development of the Communication Complexity Scale.	Brady, Nancy C.; Fleming, Kandace; Thiemann-Bourque, Kathy; Olswang, Lesley; Dowden, Patricia; Saunders, Muriel D.; Marquis, Janet	1	2012	1	0		Brady, N. C., Fleming, K., Thiemann-Bourque, K., Olswang, L., Dowden, P., Saunders, M. D., & Marquis, J. (2012). Development of the communication complexity scale. American Journal of Speech-Language Pathology.
1613b	Constrained Versus Unconstrained Intensive Language Therapy in Two Individuals With Chronic, Moderate-to-Severe Aphasia and Apraxia of Speech: Behavioral and fMRI Outcomes.	Kurland, Jacquie; Pulvermuller, Friedemann; Silva, Nicole; Burke, Katherine; Andrianopoulos, Mary	1	2012	0	1		Kurland, J., Pulvermüller, F., Silva, N., Burke, K., & Andrianopoulos, M. (2012). Constrained versus unconstrained intensive language therapy in two individuals with chronic, moderate-to-severe aphasia and apraxia of speech: behavioral and fMRI outcomes. American journal of speech-language pathology.
1614b	Toward a Quantitative Basis for Assessment and Diagnosis of Apraxia of Speech.	Haley, Katarina L.; Jacks, Adam; de Riesthal, Michael; Abou-Khalil, Rima; Roth, Heidi L.; Smith, Anne; Ziegler, Wolfram	0	2012	1	0		Haley, K. L., Jacks, A., de Riesthal, M., Abou-Khalil, R., & Roth, H. L. (2012). Toward a quantitative basis for assessment and diagnosis of apraxia of speech. Journal of Speech, Language, and Hearing Research.
1620b	The Feasibility of a Structured Cognitive Training Protocol to Address Progressive Cognitive Decline in Individuals With Vascular Dementia.	Mayer, Jamie F.; Bishop, Lilli A.; Murray, Laura L.	1	2012	0	1		Mayer, J. F., Bishop, L. A., & Murray, L. L. (2012). The feasibility of a structured cognitive training protocol to address progressive cognitive decline in individuals with vascular dementia. American journal of speech-language pathology.
1666b	Classifications of Vocalic Segments From Articulatory Kinematics: Healthy Controls and Speakers With Dysarthria.	Yunusova, Yana; Weismer, Gary G.; Lindstrom, Mary J.	0	2011	1	0		Yunusova, Y., Weismer, G. G., & Lindstrom, M. J. (2011). Classifications of vocalic segments from articulatory kinematics: Healthy controls and speakers with dysarthria. Journal of Speech, Language, and Hearing Research.
1669b	Use of Spectral/Cepstral Analyses for Differentiating Normal From Hypofunctional Voices in Sustained Vowel and Continuous Speech Contexts.	Watts, Christopher R.; Awan, Shaheen N.	0	2011	1	0		Watts, C. R., & Awan, S. N. (2011). Use of spectral/cepstral analyses for differentiating normal from hypofunctional voices in sustained vowel and continuous speech contexts. Journal of Speech, Language, and Hearing Research.
1673b	Auditory Processing Disorder and Auditory/Language Interventions: An Evidence-Based Systematic Review.	Fey, Marc E.; Richard, Gail J.; Geffner, Donna; Kamhi, Alan G.; Medwetsky, Larry; Paul, Diane; Ross-Swain, Deborah; Wallach, Geraldine P.; Frymark, Tobi; Schooling, Tracy	2	2011	0	1		Fey, M. E., Richard, G. J., Geffner, D., Kamhi, A. G., Medwetsky, L., Paul, D., ... & Schooling, T. (2011). Auditory processing disorder and auditory/language interventions: An evidence-based systematic review. Language, speech, and hearing services in schools.
1674b	Changes to Articulatory Kinematics in Response to Loudness Cues in Individuals With Parkinson's Disease.	Darling, Meghan; Huber, Jessica E.	0	2011	0	1		Darling, M., & Huber, J. E. (2011). Changes to articulatory kinematics in response to loudness cues in individuals with Parkinson’s disease. Journal of Speech, Language, and Hearing Research.
1681b	Establishing Validity of the Consensus Auditory-Perceptual Evaluation of Voice (CAPE-V)	Zraick, Richard I.; Kempster, Gail B.; Connor, Nadine P.; Thibeault, Susan; Klaben, Bernice K.; Bursac, Zoran; Thrush, Carol R.; Glaze, Leslie E.	1	2011	1	0		Zraick, R. I., Kempster, G. B., Connor, N. P., Thibeault, S., Klaben, B. K., Bursac, Z., ... & Glaze, L. E. (2011). Establishing validity of the consensus auditory-perceptual evaluation of voice (CAPE-V). American Journal of Speech-Language Pathology.
1683b	Psycholinguistic Profiling Differentiates Specific Language Impairment From Typical Development and From Attention-Deficit/Hyperactivity Disorder.	Redmond, Sean M.; Thompson, Heather L.; Goldstein, Sam	0	2011	1	0		Redmond, S. M., Thompson, H. L., & Goldstein, S. (2011). Psycholinguistic profiling differentiates specific language impairment from typical development and from attention-deficit/hyperactivity disorder. Journal of Speech, language, and hearing research.
1686b	Sensitivity and Specificity of French Language and Processing Measures for the Identification of Primary Language Impairment at Age 5.	Thordardottir, Elin; Kehayia, Eva; Mazer, Barbara; Lessard, Nicole; Majnemer, Annette; Sutton, Ann; Trudeau, Natacha; Chilingaryan, Gevorg	0	2011	1	0		Thordardottir, E., Kehayia, E., Mazer, B., Lessard, N., Majnemer, A., Sutton, A., ... & Chilingaryan, G. (2011). Sensitivity and specificity of French language and processing measures for the identification of primary language impairment at age 5. Journal of Speech, Language, and Hearing Research.
1691b	The Main Concept Analysis in Cantonese Aphasic Oral Discourse: External Validation and Monitoring Chronic Aphasia.	Pak-Hin Kong, Anthony	0	2011	1	0		Kong, A. P. H. (2011). The main concept analysis in Cantonese aphasic oral discourse: External validation and monitoring chronic aphasia. Journal of Speech, Language, and Hearing Research.
1697b	Identification of Adults With Developmental Language Impairments.	Fidler, Lesley J.; Plante, Elena; Vance, Rebecca	1	2011	1	0		Fidler, L. J., Plante, E., & Vance, R. (2011). Identification of adults with developmental language impairments. American Journal of Speech-Language Pathology.
1702b	Teledynamic Evaluation of Oropharyngeal Swallowing.	Malandraki, Georgia A.; McCullough, Gary; He, Xuming; McWeeny, Elizabeth; Perlman, Adrienne L.	0	2011	1	0		Malandraki, G. A., McCullough, G., He, X., McWeeny, E., & Perlman, A. L. (2011). Teledynamic evaluation of oropharyngeal swallowing. Journal of Speech, Language, and Hearing Research.
1705b	The Effectiveness of Parent-Implemented Language Interventions: A Meta-Analysis.	Roberts, Megan Y.; Kaiser, Ann P.	1	2011	0	1		Roberts, M. Y., & Kaiser, A. P. (2011). The effectiveness of parent-implemented language interventions: A meta-analysis. American Journal of Speech-Language Pathology.
1707b	Classification Accuracy of Brief Parent Report Measures of Language Development in Spanish-Speaking Toddlers.	Guiberson, Mark; Rodríguez, Barbara L.; Dale, Philip S.	2	2011	1	0		Guiberson, M., Rodríguez, B. L., & Dale, P. S. (2011). Classification accuracy of brief parent report measures of language development in Spanish-speaking toddlers. Language, speech, and hearing services in schools.
1708b	Using Aided AAC Models, Recasts, and Contrastive Targets to Teach Grammatical Morphemes to Children Who Use AAC.	Binger, Cathy; Maguire-Marshall, Molly; Kent-Walsh, Jennifer	0	2011	0	1		Binger, C., Maguire-Marshall, M., & Kent-Walsh, J. (2011). Using aided AAC models, recasts, and contrastive targets to teach grammatical morphemes to children who use AAC. Journal of Speech, Language, and Hearing Research.
1714b	Measuring Goodness of Story Narratives.	Le, Karen; Coelho, Carl; Mozeiko, Jennifer; Grafman, Jordan	0	2011	1	0		Lê, K., Coelho, C., Mozeiko, J., & Grafman, J. (2011). Measuring goodness of story narratives. Journal of Speech, Language, and Hearing Research.
1722b	The Use of Sound-Field Amplification Devices in Different Types of Classrooms.	Wilson, Wayne J.; Marinac, Julie; Pitty, Kathryn; Burrows, Carolyn	2	2011	0	1		Wilson, W. J., Marinac, J., Pitty, K., & Burrows, C. (2011). The use of sound-field amplification devices in different types of classrooms. Language, speech, and hearing services in schools.
1725b	Effects of Voice Therapy on Relative Fundamental Frequency During Voicing Offset and Onset in Patients With Vocal Hyperfunction.	Stepp, Cara E.; Merchant, Gabrielle R.; Heaton, James T.; Hillmana, Robert E.	0	2011	0	1		Stepp, C. E., Merchant, G. R., Heaton, J. T., & Hillman, R. E. (2011). Effects of voice therapy on relative fundamental frequency during voicing offset and onset in patients with vocal hyperfunction. Journal of Speech, Language, and Hearing Research.
1728b	Grammatical Morphology in School-Age Children With and Without Language Impairment: A Discriminant Function Analysis.	Moyle, Maura Jones; Karasinski, Courtney; Weismer, Susan Ellis; Gorman, Brenda K.	2	2011	1	0		Moyle, M. J., Karasinski, C., Weismer, S. E., & Gorman, B. K. (2011). Grammatical morphology in school-age children with and without language impairment: A discriminant function analysis. Language, speech, and hearing services in schools.
1745b	Evidence-Based Practice for Children With Speech Sound Disorders: Part 1 Narrative Review.	Baker, Elise; McLeod, Sharynne	2	2011	0	1		Baker, E., & McLeod, S. (2011). Evidence-based practice for children with speech sound disorders: Part 1 narrative review. Language, Speech, and Hearing Services in Schools.
1748b	Addressing Clinician-Client Mismatch: A Preliminary Intervention Study With a Bilingual Vietnamese-English Preschooler.	Pham, Giang; Kohnert, Kathryn; Mann, Deanine	2	2011	0	1		Pham, G., Kohnert, K., & Mann, D. (2011). Addressing clinician–client mismatch: A preliminary intervention study with a bilingual Vietnamese–English preschooler. Language, Speech, and Hearing Services in Schools.
1754b	Feasibility, Efficacy, and Social Validity of Home-Based Storybook Reading Intervention for Children With Language Impairment.	Justice, Laura M.; Skibbe, Lori E.; McGinty, Anita S.; Piasta, Shayne B.; Petrill, Stephen	0	2011	0	1		Justice, L. M., Skibbe, L. E., McGinty, A. S., Piasta, S. B., & Petrill, S. (2011). Feasibility, efficacy, and social validity of home-based storybook reading intervention for children with language impairment. Journal of Speech, Language, and Hearing Research.
1756b	The Importance of Production Frequency in Therapy for Childhood Apraxia of Speech.	Edeal, Denice Michelle; Gildersleeve-Neumanna, Christina Elke	1	2011	0	1		Edeal, D. M., & Gildersleeve-Neumann, C. E. (2011). The importance of production frequency in therapy for childhood apraxia of speech. American Journal of Speech-Language Pathology.
1762b	Concurrent and Construct Validity of Oral Language Measures With School-Age Children With Specific Language Impairment.	Hoffman, LaVae M.; Loeb, Diane Frome; Brandel, Jayne; Gillam, Ronald B.	0	2011	1	0		Hoffman, L. M., Loeb, D. F., Brandel, J., & Gillam, R. B. (2011). Concurrent and construct validity of oral language measures with school-age children with specific language impairment. Journal of Speech, Language, and Hearing Research.
1766b	Parent Perceptions of the Language Development of Toddlers With Developmental Delays Before and After Participation in Parent-Coached Language Interventions.	Romski, MaryAnn; Sevcik, Rose A.; Adamson, Lauren B.; Smith, Ashlyn; Cheslock, Melissa; Bakeman, Roger	1	2011	0	1		Romski, M., Sevcik, R. A., Adamson, L. B., Smith, A., Cheslock, M., & Bakeman, R. (2011). Parent perceptions of the language development of toddlers with developmental delays before and after participation in parent-coached language interventions. American Journal of Speech-Language Pathology.
1771b	Script Training Treatment for Adults With Apraxia of Speech.	Youmans, Gina; Youmans, Scott R.; Hancock, Adrienne B.	1	2011	0	1		Youmans, G., Youmans, S. R., & Hancock, A. B. (2011). Script training treatment for adults with apraxia of speech. American Journal of Speech-Language Pathology.
1778b	The Impact of Teacher Responsivity Education on Preschoolers' Language and Literacy Skills.	Cabell, Sonia Q.; Justice, Laura M.; Piasta, Shayne B.; Curenton, Stephanie M.; Wiggins, Alice; Turnbull, Khara Pence; Petscher, Yaacov	1	2011	0	1		Cabell, S. Q., Justice, L. M., Piasta, S. B., Curenton, S. M., Wiggins, A., Turnbull, K. P., & Petscher, Y. (2011). The impact of teacher responsivity education on preschoolers' language and literacy skills. American Journal of Speech-Language Pathology.
1783b	Developing a Weighted Measure of Speech Sound Accuracy.	Preston, Jonathan L.; Ramsdell, Heather L.; Oller, D. Kimbrough; Edwards, Mary Louise; Tobin, Stephen J.	0	2011	1	0		Preston, J. L., Ramsdell, H. L., Oller, D. K., Edwards, M. L., & Tobin, S. J. (2011). Developing a weighted measure of speech sound accuracy. Journal of Speech, Language, and Hearing Research.
1796b	Clinical Experience Using the Mann Assessment of Swallowing Ability for Identification of Patients at Risk for Aspiration in a Mixed-Disease Population.	González-Fernández, Marlís; Sein, Michael T.; Palmer, Jeffrey B.	1	2011	1	0		González-Fernández, M., Sein, M. T., & Palmer, J. B. (2011). Clinical experience using the Mann assessment of swallowing ability for identification of patients at risk for aspiration in a mixed-disease population. American Journal of Speech-Language Pathology.
1798b	The Utility of Pitch Elevation in the Evaluation of Oropharyngeal Dysphagia: Preliminary Findings.	Malandraki, Georgia A.; Hind, Jacqueline A.; Gangnon, Ronald; Logemann, Jeri A.; Robbins, JoAnne	1	2011	1	0		Malandraki, G. A., Hind, J. A., Gangnon, R., Logemann, J. A., & Robbins, J. (2011). The utility of pitch elevation in the evaluation of oropharyngeal dysphagia: preliminary findings. American Journal of Speech-Language Pathology.
1800b	Effect of Verb Network Strengthening Treatment in Moderate-to-Severe Aphasia.	Edmonds, Lisa A.; Babb, Michelle	1	2011	0	1		Edmonds, L. A., & Babb, M. (2011). Effect of verb network strengthening treatment in moderate-to-severe aphasia. American Journal of Speech-Language Pathology.
1830b	Bilingual Language Assessment: A Meta-Analysis of Diagnostic Accuracy.	Dollaghan, Christine A.; Horner, Elizabeth A.	0	2011	1	0		Dollaghan, C. A., & Horner, E. A. (2011). Bilingual language assessment: A meta-analysis of diagnostic accuracy. Journal of Speech, Language, and Hearing Research.
1831b	Development of a Short Form of the Boston Naming Test for Individuals With Aphasia.	del Toro, Christina M.; Bislick, Lauren P.; Comer, Matthew; Velozo, Craig; Romero, Sergio; Rothi, Leslie J. Gonzalez; Kendall, Diane L.	0	2011	1	0		del Toro, C. M., Bislick, L. P., Comer, M., Velozo, C., Romero, S., Rothi, L. J. G., & Kendall, D. L. (2011). Development of a short form of the Boston naming test for individuals with aphasia. Journal of Speech, Language, and Hearing Research.
1832b	Treatment of Category Generation and Retrieval in Aphasia: Effect of Typicality of Category Items.	Kiran, Swathi; Sandberg, Chaleece; Sebastian, Rajani	0	2011	0	1		Kiran, S., Sandberg, C., & Sebastian, R. (2011). Treatment of category generation and retrieval in aphasia: Effect of typicality of category items. Journal of Speech, Language, and Hearing Research.
1833b	Supervised Home Training of Dialogue Skills in Chronic Aphasia: A Randomized Parallel Group Study.	Nobis-Bosch, Ruth; Springer, Luise; Radermacher, Irmgard; Huber, Walter	0	2011	0	1		Nobis-Bosch, R., Springer, L., Radermacher, I., & Huber, W. (2011). Supervised home training of dialogue skills in chronic aphasia: A randomized parallel group study. Journal of Speech, Language, and Hearing Research.
1836b	Initial Mean Length of Utterance Predicts the Relative Efficacy of Two Grammatical Treatments in Preschoolers With Specific Language Impairment.	Yoder, Paul J.; Molfese, Dennis; Gardner, Elizabeth	0	2011	0	1		Yoder, P. J., Molfese, D., & Gardner, E. (2011). Initial mean length of utterance predicts the relative efficacy of two grammatical treatments in preschoolers with specific language impairment. Journal of Speech, Language, and Hearing Research.
1846b	Relationship Between Verbal Working Memory and the SCAN-C in Children With Specific Language Impairment.	Lum, Jarrad A. G.; Zarafa, Michelle	2	2010	1	0		Lum, J. A., & Zarafa, M. (2010). Relationship between verbal working memory and the SCAN–C in children with specific language impairment. Language, Speech, and Hearing Services in Schools.
1851b	Who Does What to Whom: Introduction of Referents in Children's Storytelling From Pictures.	Schneider, Phyllis; Hayward, Denyse	2	2010	1	0		Schneider, P., & Hayward, D. (2010). Who does what to whom: Introduction of referents in children’s storytelling from pictures. Language, Speech, and Hearing Services in Schools.
1852b	Using Standardized Tests to Inventory Consonant and Vowel Production: A Comparison of 11 Tests of Articulation and Phonology.	Eisenberg, Sarita L; Hitchcock, Elaine R	2	2010	1	0		Eisenberg, S. L., & Hitchcock, E. R. (2010). Using standardized tests to inventory consonant and vowel production: A comparison of 11 tests of articulation and phonology. Language, Speech, and Hearing Services in Schools.
1854b	Print-Focused Read-Alouds in Preschool Classrooms: Intervention Effectiveness and Moderators of Child Outcomes.	Justice, Laura M; McGinty, Anita S; Piasta, Shayne B; Kaderavek, Joan N; Fan, Xitao	2	2010	0	1		Justice, L. M., McGinty, A. S., Piasta, S. B., Kaderavek, J. N., & Fan, X. (2010). Print-focused read-alouds in preschool classrooms: Intervention effectiveness and moderators of child outcomes. Language, Speech, and Hearing Services in Schools.
1855b	Quality of Communication Life in Adolescents With High-Functioning Autism and Asperger Syndrome: A Feasibility Study.	Burgess, Sloane; Turkstra, Lyn S	2	2010	1	0		Burgess, S., & Turkstra, L. S. (2010). Quality of communication life in adolescents with high-functioning autism and Asperger syndrome: A feasibility study. Language, Speech, and Hearing Services in Schools.
1861b	Measuring Pragmatic Language in Speakers With Autism Spectrum Disorders: Comparing the Children's Communication Checklist-2 and the Test of Pragmatic Language.	Volden, J; Phillips, L	1	2010	1	0		Volden, J., & Phillips, L. (2010). Measuring pragmatic language in speakers with autism spectrum disorders: Comparing the Children’s Communication Checklist—2 and the Test of Pragmatic Language. American Journal of Speech-Language Pathology.
1867b	A Treatment Sequence for Phonological Alexia/Agraphia.	Beeson, P. M.; Rising, K.; Kim, E. S.; Rapcsak, S. Z.	0	2010	0	1		Beeson, P. M., Rising, K., Kim, E. S., & Rapcsak, S. Z. (2010). A treatment sequence for phonological alexia/agraphia. Journal of Speech, Language, and Hearing Research.
1870b	Using Laryngeal Electromyography to Differentiate Presbylarynges From Paresis.	Stager, S. V.; Bielamowicz, S. A.	0	2010	1	0		Stager, S. V., & Bielamowicz, S. A. (2010). Using laryngeal electromyography to differentiate presbylarynges from paresis. Journal of Speech, Language, and Hearing Research.
1873b	A Treatment for Dysprosody in Childhood Apraxia of Speech.	Ballard, Kirrie J.; Robin, Donald A.; McCabe, Patricia; McDonald, Jeannie	0	2010	0	1		Ballard, K. J., Robin, D. A., McCabe, P., & McDonald, J. (2010). A treatment for dysprosody in childhood apraxia of speech. Journal of Speech, Language, and Hearing Research.
1878b	A preliminary evaluation of Fast ForWord-Language as an adjuvant treatment in language intervention.	Fey, M. E.; Finestack, L. H.; Gajewski, B. J.; Popescu, M.; Lewine, J. D.	0	2010	0	1		Fey, M. E., Finestack, L. H., Gajewski, B. J., Popescu, M., & Lewine, J. D. (2010). A preliminary evaluation of Fast ForWord-Language as an adjuvant treatment in language intervention. Journal of Speech, Language, and Hearing Research.
1890b	Differentiating Cantonese-speaking preschool children with and without SLI using MLU and lexical diversity (D)	Wong, A. M.-Y.; Klee, T.; Stokes, S. F.; Fletcher, P.; Leonard, L. B.	0	2010	1	0		Wong, A. M. Y., Klee, T., Stokes, S. F., Fletcher, P., & Leonard, L. B. (2010). Differentiating Cantonese-speaking preschool children with and without SLI using MLU and lexical diversity (D). Journal of Speech, Language, and Hearing Research.
1894b	Randomized controlled trial of video self-modeling following speech restructuring treatment for stuttering.	Cream, A; O'Brian, S; Jones, M; Block, S; Harrison, E; Lincoln, M; Hewat, S; Packman, A; Menzies, R; Onslow, M	0	2010	0	1		Cream, A., O’Brian, S., Jones, M., Block, S., Harrison, E., Lincoln, M., ... & Onslow, M. (2010). Randomized controlled trial of video self-modeling following speech restructuring treatment for stuttering. Journal of Speech, Language, and Hearing Research.
1902b	Effects of parent instruction on the symbolic communication of children using augmentative and alternative communication during storybook reading.	Kent-Walsh, J; Binger, C; Hasham, Z	1	2010	0	1		Kent-Walsh, J., Binger, C., & Hasham, Z. (2010). Effects of parent instruction on the symbolic communication of children using augmentative and alternative communication during storybook reading. American Journal of Speech-Language Pathology.
1904b	Using language sample databases.	Heilmann, JJ; Miller, JF; Nockerts, A	2	2010	1	0		Heilmann, J. J., Miller, J. F., & Nockerts, A. (2010). Using language sample databases. Language, Speech, and Hearing Services in Schools.
1905b	Clinical implications of dynamic systems theory for phonological development.	Rvachew, S; Bernhardt, BM	1	2010	0	1		Rvachew, S., & Bernhardt, B. M. (2010). Clinical implications of dynamic systems theory for phonological development. American Journal of Speech-Language Pathology.
1907b	Discriminating Dysarthria Type From Envelope Modulation Spectra.	Liss, Julie M.; LeGendre, Sue; Lotto, Andrew J.	0	2010	1	0		Liss, J. M., LeGendre, S., & Lotto, A. J. (2010). Discriminating dysarthria type from envelope modulation spectra. Journal of Speech, Language, and Hearing Research.
1911b	The impact of object and gesture imitation training on language use in children with autism spectrum disorder.	Ingersoll, B; Lalonde, K	0	2010	0	1		Ingersoll, B., & Lalonde, K. (2010). The impact of object and gesture imitation training on language use in children with autism spectrum disorder. Journal of Speech, Language, and Hearing Research.
1913b	Voice and Fluency Changes as a Function of Speech Task and Deep Brain Stimulation.	Van Lancker Sidtis, Diana; Rogers, Tiffany; Godier, Violette; Tagliati, Michele; Sidtis, John J.	0	2010	0	1		Sidtis, D. V. L., Rogers, T., Godier, V., Tagliati, M., & Sidtis, J. J. (2010). Voice and fluency changes as a function of speech task and deep brain stimulation. Journal of speech, language, and hearing research.
1918b	Internet-Based Telehealth Assessment of Language Using the CELF-4.	Waite, Monique C; Thodoros, Deborah G; Russell, Trevor G; Cahill, Louise M	2	2010	1	0		Waite, M. C., Theodoros, D. G., Russell, T. G., & Cahill, L. M. (2010). Internet-based telehealth assessment of language using the CELF–4. Language, Speech, and Hearing Services in Schools.
1928b	Cross-Language Nonword Repetition by Bilingual and Monolingual Children.	Windsor, J; Kohnert, K; Lobitz, KF; Pham, GT	1	2010	1	0		Windsor, J., Kohnert, K., Lobitz, K. F., & Pham, G. T. (2010). Cross-language nonword repetition by bilingual and monolingual children. American Journal of Speech-Language Pathology.
1934b	Mean length of utterance levels in 6-month intervals for children 3 to 9 years with and without language impairments.	Rice, ML; Smolik, F; Perpich, D; Thompson, T; Rytting, N; Blossom, M	0	2010	1	0		Rice, M. L., Smolik, F., Perpich, D., Thompson, T., Rytting, N., & Blossom, M. (2010). Mean length of utterance levels in 6-month intervals for children 3 to 9 years with and without language impairments. Journal of Speech, Language, and Hearing Research.
1935b	Nonwords and generalization in children with phonological disorders.	Gierut, JA; Morrisette, ML; Ziemer, SM	1	2010	0	1		Gierut, J. A., Morrisette, M. L., & Ziemer, S. M. (2010). Nonwords and generalization in children with phonological disorders. American Journal of Speech-Language Pathology.
1936b	Language and literacy curriculum supplement for preschoolers who are academically at risk: a feasibility study.	Justice, LM; McGinty, AS; Cabell, SQ; Kilday, CR; Knighton, K; Huffman, G	2	2010	0	1		Justice, L. M., McGinty, A. S., Cabell, S. Q., Kilday, C. R., Knighton, K., & Huffman, G. (2010). Language and literacy curriculum supplement for preschoolers who are academically at risk: A feasibility study. Language, Speech, and Hearing Services in Schools.
1941b	Measurement properties and classification accuracy of two spanish parent surveys of language development for preschool-age children.	Guiberson, M; Rodriguez, BL	1	2010	1	0		Guiberson, M., & Rodríguez, B. L. (2010). Measurement properties and classification accuracy of two Spanish parent surveys of language development for preschool-age children. American Journal of Speech-Language Pathology.
1947b	Evidence-based systematic review: effects of different service delivery models on communication outcomes for elementary school-age children.	Cirrin, FM; Schooling, TL; Nelson, NW; Diehl, SF; Flynn, PF; Staskowski, M; Torrey, TZ; Adamczyk, DF	2	2010	0	1		Cirrin, F. M., Schooling, T. L., Nelson, N. W., Diehl, S. F., Flynn, P. F., Staskowski, M., ... & Adamczyk, D. F. (2010). Evidence-based systematic review: Effects of different service delivery models on communication outcomes for elementary school–age children. Language, Speech, and Hearing Services in Schools.
1949b	Extending use of the NRT to preschool-age children with and without specific language impairment.	Deevy, P; Weil, LW; Leonard, LB; Goffman, L	2	2010	1	0		Deevy, P., Weil, L. W., Leonard, L. B., & Goffman, L. (2010). Extending use of the NRT to preschool-age children with and without specific language impairment. Language, Speech, and Hearing Services in Schools.
1951b	Effects of a conversation intervention on the expressive vocabulary development of prekindergarten children.	Ruston, HP; Schwanenflugel, PJ	2	2010	0	1		Ruston, H. P., & Schwanenflugel, P. J. (2010). Effects of a conversation intervention on the expressive vocabulary development of prekindergarten children. Language, speech, and hearing services in schools.
1959b	Index of productive syntax for children who speak African American English.	Oetting, JB; Newkirk, BL; Hartfield, LR; Wynn, CG; Pruitt, SL; Garrity, AW	2	2010	1	0		Oetting, J. B., Newkirk, B. L., Hartfield, L. R., Wynn, C. G., Pruitt, S. L., & Garrity, A. W. (2010). Index of productive syntax for children who speak African American English. Language, Speech, and Hearing Services in Schools.
1960b	Formant centralization ratio: a proposal for a new acoustic measure of dysarthric speech.	Sapir, S; Ramig, LO; Spielman, JL; Fox, C	0	2010	1	0		Sapir, S., Ramig, L. O., Spielman, J. L., & Fox, C. (2010). Formant centralization ratio: A proposal for a new acoustic measure of dysarthric speech. Journal of speech, language, and hearing research.
1971b	Randomized comparison of augmented and nonaugmented language interventions for toddlers with developmental delays and their parents.	Romski, M; Sevcik, RA; Adamson, LB; Cheslock, M; Smith, A; Barker, RM; Bakeman, R	0	2010	0	1		Romski, M., Sevcik, R. A., Adamson, L. B., Cheslock, M., Smith, A., Barker, R. M., & Bakeman, R. (2010). Randomized comparison of augmented and nonaugmented language interventions for toddlers with developmental delays and their parents. Journal of Speech, Language, and Hearing Research.
1984b	The effects of literate narrative intervention on children with neurologically based language impairments: an early stage study.	Petersen, DB; Gillam, SL; Spencer, T; Gillam, RB	0	2010	0	1		Petersen, D. B., Gillam, S. L., Spencer, T., & Gillam, R. B. (2010). The effects of literate narrative intervention on children with neurologically based language impairments: An early stage study. Journal of Speech, Language, and Hearing Research.
1988b	Augmented language intervention and the emergence of symbol-infused joint engagement.	Adamson, LB; Romski, M; Bakeman, R; Sevcik, RA	0	2010	0	1		Adamson, L. B., Romski, M., Bakeman, R., & Sevcik, R. A. (2010). Augmented language intervention and the emergence of symbol-infused joint engagement. Journal of Speech, Language, and Hearing Research.
1998b	Within-treatment factors as predictors of outcomes following conversational recasting.	Hassink, JM; Leonard, LB	1	2010	0	1		Hassink, J. M., & Leonard, L. B. (2010). Within-treatment factors as predictors of outcomes following conversational recasting. American Journal of Speech-Language Pathology.
2007b	The internal validity and acceptability of the Danish SI-3: a language-screening instrument for 3-year-olds.	Bleses, D; Vach, W; Jorgensen, RN; Worm, T	0	2010	1	0		Bleses, D., Vach, W., Jørgensen, R. N., & Worm, T. (2010). The internal validity and acceptability of the Danish SI-3: A language-screening instrument for 3-year-olds. Journal of Speech, Language, and Hearing Research.
2026b	Teaching educational assistants to facilitate the multisymbol message productions of young students who require augmentative and alternative communication.	Binger, C; Kent-Walsh, J; Ewing, C; Taylor, S	1	2010	0	1		Binger, C., Kent-Walsh, J., Ewing, C., & Taylor, S. (2010). Teaching educational assistants to facilitate the multisymbol message productions of young students who require augmentative and alternative communication. American Journal of Speech-Language Pathology.
2028b	An Experimental Investigation of the Effect of Altered Auditory Feedback on the Conversational Speech of Adults Who Stutter.	Lincoln, Michelle; Packman, Ann; Onslow, Mark; Jones, Mark	0	2010	0	1		Lincoln, M., Packman, A., Onslow, M., & Jones, M. (2010). An experimental investigation of the effect of altered auditory feedback on the conversational speech of adults who stutter. Journal of Speech, Language, and Hearing Research.
2031b	Identification of clinical markers of specific language impairment in adults.	Poll, GH; Betz, SK; Miller, CA	0	2010	1	0		Poll, G. H., Betz, S. K., & Miller, C. A. (2010). Identification of clinical markers of specific language impairment in adults. Journal of Speech, Language, and Hearing Research.
2032b	Evidence-Based Systematic Review: Effects of Oral Motor Interventions on Feeding and Swallowing in Preterm Infants.	Arvedson, J; Clark, H; Lazarus, C; Schooling, T; Frymark, T	1	2010	0	1		Arvedson, J., Clark, H., Lazarus, C., Schooling, T., & Frymark, T. (2010). Evidence-based systematic review: effects of oral motor interventions on feeding and swallowing in preterm infants. American Journal of speech-language pathology.
2041b	Effectiveness of the picture exchange communication system (PECS) on communication and speech for children with autism spectrum disorders: a meta-analysis.	Flippin, M; Reszka, S; Watson, LR	1	2010	0	1		Flippin, M., Reszka, S., & Watson, L. R. (2010). Effectiveness of the Picture Exchange Communication System (PECS) on communication and speech for children with autism spectrum disorders: A meta-analysis. American Journal of Speech-Language Pathology.
2049b	The effect of aided language stimulation on vocabulary acquisition in children with little or no functional speech.	Dada, S; Alant, E	1	2009	0	1		Dada, S., & Alant, E. (2009). The effect of aided language stimulation on vocabulary acquisition in children with little or no functional speech. American Journal of Speech-Language Pathology.
2055b	A nonword repetition task for speakers with misarticulations: the Syllable Repetition Task (SRT)	Shriberg, LD; Lohmeier, HL; Campbell, TF; Dollaghan, CA; Green, JR; Moore, CA	0	2009	1	0		Shriberg, L. D., Lohmeier, H. L., Campbell, T. F., Dollaghan, C. A., Green, J. R., & Moore, C. A. (2009). A nonword repetition task for speakers with misarticulations: The Syllable Repetition Task (SRT). Journal of Speech, Language, and Hearing Research.
2057b	Effects of the SpeechEasy on objective and perceived aspects of stuttering: a 6-month, phase I clinical trial in naturalistic environments.	Pollard, R; Ellis, JB; Finan, D; Ramig, PR	0	2009	0	1		Pollard, R., Ellis, J. B., Finan, D., & Ramig, P. R. (2009). Effects of the SpeechEasy on objective and perceived aspects of stuttering: A 6-month, Phase I clinical trial in naturalistic environments. Journal of Speech, Language, and Hearing Research.
2062b	The diagnostic accuracy and construct validity of the structured photographic expressive language test--preschool: second edition.	Greenslade, KJ; Plante, E; Vance, R	2	2009	1	0		Greenslade, K. J., Plante, E., & Vance, R. (2009). The diagnostic accuracy and construct validity of the Structured Photographic Expressive Language Test—Preschool. Language, Speech, and Hearing Services in Schools.
2063b	Effects of loud and amplified speech on sentence and word intelligibility in Parkinson disease.	Neel, AT	0	2009	0	1		Neel, A. T. (2009). Effects of loud and amplified speech on sentence and word intelligibility in Parkinson disease. Journal of Speech, Language, and Hearing Research.
2065b	Relief of acquired stuttering associated with Parkinson's disease by unilateral left subthalamic brain stimulation.	Walker, HC; Phillips, DE; Boswell, DB; Guthrie, BL; Guthrie, SL; Nicholas, AP; Montgomery, EB; Watts, RL	0	2009	0	1		Walker, H. C., Phillips, D. E., Boswell, D. B., Guthrie, B. L., Guthrie, S. L., Nicholas, A. P., ... & Watts, R. L. (2009). Relief of acquired stuttering associated with Parkinson’s disease by unilateral left subthalamic brain stimulation. Journal of Speech, Language, and Hearing Research.
2070b	Quantifying speech rhythm abnormalities in the dysarthrias.	Liss, JM; White, L; Mattys, SL; Lansford, K; Lotto, AJ; Spitzer, SM; Caviness, JN	0	2009	1	0		Liss, J. M., White, L., Mattys, S. L., Lansford, K., Lotto, A. J., Spitzer, S. M., & Caviness, J. N. (2009). Quantifying speech rhythm abnormalities in the dysarthrias. Journal of speech, language, and hearing research.
2079b	Measurement of phonated intervals during four fluency-inducing conditions.	Davidow, JH; Bothe, AK; Andreatta, RD; Ye, J	0	2009	0	1		Davidow, J. H., Bothe, A. K., Andreatta, R. D., & Ye, J. (2009). Measurement of phonated intervals during four fluency-inducing conditions. Journal of Speech, Language, and Hearing Research.
2098b	The effects of Fast ForWord language on the phonemic awareness and reading skills of school-age children with language impairments and poor reading skills.	Loeb, DF; Gillam, RB; Hoffman, L; Brandel, J; Marquis, J	1	2009	0	1		Loeb, D. F., Gillam, R. B., Hoffman, L., Brandel, J., & Marquis, J. (2009). The effects of Fast ForWord Language on the phonemic awareness and reading skills of school-age children with language impairments and poor reading skills. American Journal of Speech-Language Pathology.
2100b	On the sensitivity and specificity of nonword repetition and sentence recall to language and memory impairments in children.	Archibald, LMD; Joanisse, MF	0	2009	1	0		Archibald, L. M., & Joanisse, M. F. (2009). On the sensitivity and specificity of nonword repetition and sentence recall to language and memory impairments in children. Journal of Speech, Language, and Hearing Research.
2108b	Outcomes measurement in voice disorders: application of an acoustic index of dysphonia severity.	Awan, SN; Roy, N	0	2009	1	0		Awan, S. N., & Roy, N. (2009). Outcomes measurement in voice disorders: application of an acoustic index of dysphonia severity. Journal of Speech, Language, and Hearing Research.
2112b	Developing the communicative participation item bank: Rasch analysis results from a spasmodic dysphonia sample.	Baylor, CR; Yorkston, KM; Eadie, TL; Miller, RM; Amtmann, D	0	2009	1	0		Baylor, C. R., Yorkston, K. M., Eadie, T. L., Miller, R. M., & Amtmann, D. (2009). Developing the Communicative Participation Item Bank: Rasch analysis results from a spasmodic dysphonia sample. Journal of Speech, Language, and Hearing Research.
2114b	Validity of teacher report for assessing the emergent literacy skills of at-risk preschoolers.	Cabell, SQ; Justice, LM; Zucker, TA; Kilday, CR	2	2009	1	0		Cabell, S. Q., Justice, L. M., Zucker, T. A., & Kilday, C. R. (2009). Validity of teacher report for assessing the emergent literacy skills of at-risk preschoolers. Language, Speech, and Hearing Services in Schools.
2115b	The influence of speaking rate on nasality in the speech of hearing-impaired individuals.	Dwyer, CH; Robb, MP; O'Beirne, GA; Gilbert, HR	0	2009	0	1		Dwyer, C. H., Robb, M. P., O’Beirne, G. A., & Gilbert, H. R. (2009). The influence of speaking rate on nasality in the speech of hearing-impaired individuals. Journal of Speech, Language, and Hearing Research.
2128b	Comparison of acoustic and kinematic approaches to measuring utterance-level speech variability.	Howell, P; Anderson, AJ; Bartrip, J; Bailey, E	0	2009	1	0		Howell, P., Anderson, A. J., Bartrip, J., & Bailey, E. (2009). Comparison of acoustic and kinematic approaches to measuring utterance-level speech variability. Journal of Speech, Language, and Hearing Research.
2131b	Teaching students with reading difficulties to be close readers: a feasibility study.	Katz, LA; Carlisle, JF	2	2009	0	1		Katz, L. A., & Carlisle, J. F. (2009). Teaching students with reading difficulties to be close readers: A feasibility study. Language, Speech, and Hearing Services in Schools.
2136b	Effects of robust vocabulary instruction and multicultural text on the development of word knowledge among African American children.	Lovelace, S; Stewart, SR	1	2009	0	1		Lovelace, S., & Stewart, S. R. (2009). Effects of robust vocabulary instruction and multicultural text on the development of word knowledge among African American children. American Journal of Speech-Language Pathology.
2147b	The utility of school-age narrative microstructure indices: INMIS and the proportion of restricted utterances.	Hoffman, LM	2	2009	1	0		Hoffman, L. M. (2009). The utility of school-age narrative microstructure indices: INMIS and the proportion of restricted utterances. Language, Speech, and Hearing Services in Schools.
2149b	A comparative study of two acoustic measures of hypernasality.	Vogel, AP; Ibrahim, HM; Reilly, S; Kilpatrick, N	0	2009	1	0		Vogel, A. P., Ibrahim, H. M., Reilly, S., & Kilpatrick, N. (2009). A comparative study of two acoustic measures of hypernasality. Journal of Speech, Language, and Hearing Research.
2151b	The accuracy of parent and teacher reports in assessing the vocabulary knowledge of Chinese children with hearing impairment.	Lee, K; Chiu, SN; van Hasselt, CA; Tong, M	2	2009	1	0		Lee, K., Chiu, S. N., Van Hasselt, C. A., & Tong, M. (2009). The accuracy of parent and teacher reports in assessing the vocabulary knowledge of Chinese children with hearing impairment. Language, Speech, and Hearing Services in Schools.
2152b	The effect of Tier 2 intervention for phonemic awareness in a response-to-intervention model in low-income preschool classrooms.	Koutsoftas, AD; Harmon, MT; Gray, S	2	2009	0	1		Koutsoftas, A. D., Harmon, M. T., & Gray, S. (2009). The effect of tier 2 intervention for phonemic awareness in a response-to-intervention model in low-income preschool classrooms. Language, Speech, and Hearing Services in Schools.
2154b	Integrated morphological awareness intervention as a tool for improving literacy.	Kirk, C; Gillon, GT	2	2009	0	1		Kirk, C., & Gillon, G. T. (2009). Integrated morphological awareness intervention as a tool for improving literacy. Language, speech, and hearing services in schools.
2155b	An investigation of treatment scheduling for phonemic awareness with kindergartners who are at risk for reading difficulties.	Ukrainetz, TA; Ross, CL; Harm, HM	2	2009	0	1		Ukrainetz, T. A., Ross, C. L., & Harm, H. M. (2009). An investigation of treatment scheduling for phonemic awareness with kindergartners who are at risk for reading difficulties. Language, Speech, and Hearing Services in Schools.
2165b	Accelerating preschoolers' early literacy development through classroom-based teacher-child storybook reading and explicit print referencing.	Justice, LM; Kaderavek, JN; Fan, X; Sofka, A; Hunt, A	2	2009	0	1		Justice, L. M., Kaderavek, J. N., Fan, X., Sofka, A., & Hunt, A. (2009). Accelerating preschoolers' early literacy development through classroom-based teacher–child storybook reading and explicit print referencing. Language, Speech, and Hearing Services in Schools.
2170b	Feasibility and benefit of parent participation in a program emphasizing preschool child language development while homeless.	O'Neil-Pirozzi, TM	1	2009	0	1		O'Neil-Pirozzi, T. M. (2009). Feasibility and benefit of parent participation in a program emphasizing preschool child language development while homeless. American Journal of Speech-Language Pathology.
2181b	The diagnostic accuracy of a new test of early nonword repetition for differentiating late talking and typically developing children.	Stokes, SF; Klee, T	0	2009	1	0		Stokes, S. F., & Klee, T. (2009). The diagnostic accuracy of a new test of early nonword repetition for differentiating late talking and typically developing children. Journal of Speech, Language, and Hearing Research.
2190b	Long-term outcome of the Lidcombe Program for early stuttering intervention.	Miller, B; Guitar, B	1	2009	0	1		Miller, B., & Guitar, B. (2009). Long-term outcome of the Lidcombe Program for early stuttering intervention. American Journal of Speech-Language Pathology.
2199b	Identification of Children With Language Impairment: Investigating the Classification Accuracy of the MacArthur-Bates Communicative Development Inventories, Level III.	Skarakis-Doyle, E; Campbell, W; Dempsey, L	1	2009	1	0		Skarakis-Doyle, E., Campbell, W., & Dempsey, L. (2009). Identification of children with language impairment: Investigating the classification accuracy of the MacArthur–Bates Communicative Development Inventories, Level III. American Journal of Speech-Language Pathology.
2204b	Evidence-based systematic review: effects of neuromuscular electrical stimulation on swallowing and neural activation.	Clark, H; Lazarus, C; Arvedson, J; Schooling, T; Frymark, T	1	2009	0	1		Clark, H., Lazarus, C., Arvedson, J., Schooling, T., & Frymark, T. (2009). Evidence-based systematic review: effects of neuromuscular electrical stimulation on swallowing and neural activation. American Journal of Speech-Language Pathology.
2205b	Defining and measuring dysphagia following stroke.	Daniels, SK; Schroeder, MF; DeGeorge, PC; Corey, DM; Foundas, AL; Rosenbek, JC	1	2009	1	0		Daniels, S. K., Schroeder, M. F., DeGeorge, P. C., Corey, D. M., Foundas, A. L., & Rosenbek, J. C. (2009). Defining and measuring dysphagia following stroke. American Journal of Speech-Language Pathology.
2214b	Measurement of speech effort during fluency-inducing conditions in adults who do and do not stutter.	Ingham, RJ; Bothe, AK; Jang, E; Yates, L; Cotton, J; Seybold, I	0	2009	0	1		Ingham, R. J., Bothe, A. K., Jang, E., Yates, L., Cotton, J., & Seybold, I. (2009). Measurement of speech effort during fluency-inducing conditions in adults who do and do not stutter. Journal of Speech, Language, and Hearing Research.
2215b	Effects of It Takes Two to Talk--The Hanen Program for Parents of Preschool Children with Cerebral Palsy: findings from an exploratory study.	Pennington, L; Thomson, K; James, P; Martin, L; McNally, R	0	2009	0	1		Pennington, L., Thomson, K., James, P., Martin, L., & McNally, R. (2009). Effects of It Takes Two to Talk—The Hanen Program for parents of preschool children with cerebral palsy: Findings from an exploratory study. Journal of Speech, Language, and Hearing Research.
2223b	Evidence-based systematic review: effects of nonspeech oral motor exercises on speech.	McCauley, RJ; Strand, E; Lof, GL; Schooling, T; Frymark, T	1	2009	0	1		McCauley, R. J., Strand, E., Lof, G. L., Schooling, T., & Frymark, T. (2009). Evidence-based systematic review: Effects of nonspeech oral motor exercises on speech. American Journal of Speech-Language Pathology.
2230b	Evaluation of a deductive procedure to teach grammatical inflections to children with language impairment.	Finestack, LH; Fey, ME	1	2009	0	1		Finestack, L. H., & Fey, M. E. (2009). Evaluation of a deductive procedure to teach grammatical inflections to children with language impairment. American Journal of Speech-Language Pathology.
2241b	The Efficacy of Fast ForWord Language Intervention in School-Age Children With Language Impairment: A Randomized Controlled Trial.	Gillam, RB; Loeb, DF; Hoffman, LM; Bohman, T; Champlin, CA; Thibodeau, L; Widen, J; Brandel, J; Friel-Patti, S	0	2008	0	1		Gillam, R. B., Loeb, D. F., Hoffman, L. M., Bohman, T., Champlin, C. A., Thibodeau, L., ... & Friel-Patti, S. (2008). The efficacy of Fast ForWord language intervention in school-age children with language impairment: A randomized controlled trial. Journal of Speech, Language, and Hearing Research.
2242b	Transition from tube to oral feeding in the school setting.	McKirdy, LS; Sheppard, JJ; Osborne, ML; Payne, P	2	2008	0	1		McKirdy, L. S., Sheppard, J. J., Osborne, M. L., & Payne, P. (2008). Transition from tube to oral feeding in the school setting. Language, Speech, and Hearing Services in Schools.
2259b	Effects of augmentative and alternative communication intervention on speech production in children with autism: a systematic review.	Schlosser, RW; Wendt, O	1	2008	0	1		Schlosser, R. W., & Wendt, O. (2008). Effects of augmentative and alternative communication intervention on speech production in children with autism: A systematic review. American journal of speech-language pathology.
2268b	The role of color cues in facilitating accurate and rapid location of aided symbols by children with and without Down syndrome.	Wilkinson, K; Carlin, M; Thistle, J	1	2008	0	1		Wilkinson, K., Carlin, M., & Thistle, J. (2008). The role of color cues in facilitating accurate and rapid location of aided symbols by children with and without Down syndrome. American Journal of Speech-Language Pathology.
2272b	Articulatory changes following treatment of muscle tension dysphonia: preliminary acoustic evidence.	Dromey, C; Nissen, SL; Roy, N; Merrill, RM	0	2008	0	1		Dromey, C., Nissen, S. L., Roy, N., & Merrill, R. M. (2008). Articulatory changes following treatment of muscle tension dysphonia: preliminary acoustic evidence. Journal of Speech, Language, and Hearing Research.
2282b	An experimental clinical trial of a cognitive-behavior therapy package for chronic stuttering.	Menzies, RG; O'Brian, S; Onslow, M; Packman, A; St. Clare, T; Block, S	0	2008	0	1		Menzies, R. G., O’Brian, S., Onslow, M., Packman, A., St Clare, T., & Block, S. (2008). An experimental clinical trial of a cognitive-behavior therapy package for chronic stuttering. Journal of Speech, Language, and Hearing Research.
2287b	The effect of frequency altered feedback on stuttering duration and type.	Stuart, A; Frazier, CL; Kalinowski, J; Vos, PW	0	2008	0	1		Stuart, A., Frazier, C. L., Kalinowski, J., & Vos, P. W. (2008). The effect of frequency altered feedback on stuttering duration and type. Journal of Speech, Language, and Hearing Research.
2290b	The acquisition of tense and agreement morphemes by children with specific language impairment during intervention: phase 3.	Leonard, LB; Camarata, SM; Pawlowska, M; Brown, B; Camarata, MN	0	2008	0	1		Leonard, L. B., Camarata, S. M., Pawłowska, M., Brown, B., & Camarata, M. N. (2008). The acquisition of tense and agreement morphemes by children with specific language impairment during intervention: Phase 3. Journal of Speech, Language, and Hearing Research.
2303b	Experimental evaluation of a preschool language curriculum: influence on children's expressive language skills.	Justice, LM; Mashburn, A; Pence, KL; Wiggins, A	0	2008	0	1		Justice, L. M., Mashburn, A., Pence, K. L., & Wiggins, A. (2008). Experimental evaluation of a preschool language curriculum: Influence on children’s expressive language skills. Journal of Speech, Language, and Hearing Research.
2308b	The application of evidence-based practice to nonspeech oral motor treatments.	Lass, NJ; Pannbacker, M	2	2008	0	1		Lass, N. J., & Pannbacker, M. (2008). The application of evidence-based practice to nonspeech oral motor treatments. Language, Speech, and Hearing Services in Schools.
2322b	Identification of children's stuttered and nonstuttered speech by highly experienced judges: binary judgments and comparisons with disfluency-types definitions.	Bothe, AK	0	2008	1	0		Bothe, A. K. (2008). Identification of children’s stuttered and nonstuttered speech by highly experienced judges: Binary judgments and comparisons with disfluency-types definitions. Journal of Speech, Language, and Hearing Research.
2324b	Initial Validity and Reliability of the SCCAN: Using Tailored Testing to Assess Adult Cognition and Communication.	Milman, LH; Holland, A; Kaszniak, AW; D'Agostino, J; Garrett, M; Rapcsak, S	0	2008	1	0		Milman, L. H., Holland, A., Kaszniak, A. W., D’Agostino, J., Garrett, M., & Rapcsak, S. (2008). Initial validity and reliability of the SCCAN: using tailored testing to assess adult cognition and communication. Journal of Speech, Language, and Hearing Research.
2326b	A phase II trial of telehealth delivery of the Lidcombe Program of Early Stuttering Intervention.	Lewis, C; Packman, A; Onslow, M; Simpson, JM; Jones, M	1	2008	0	1		Lewis, C., Packman, A., Onslow, M., Simpson, J. M., & Jones, M. (2008). A phase II trial of telehealth delivery of the Lidcombe Program of Early Stuttering Intervention. American Journal of Speech-Language Pathology.
2327b	Typicality of inanimate category exemplars in aphasia treatment: further evidence for semantic complexity.	Kiran, S	0	2008	0	1		Kiran, S. (2008). Typicality of inanimate category exemplars in aphasia treatment: Further evidence for semantic complexity. Journal of Speech, Language, and Hearing Research.
2343b	Efficacy of the Discreteness of Voicing Category (DOVC) Measure for characterizing voicing errors in children with cochlear implants: a report.	Bharadwaj, SV; Graves, AG	0	2008	1	0		Bharadwaj, S. V., & Graves, A. G. (2008). Efficacy of the discreteness of voicing category (DOVC) measure for characterizing voicing errors in children with cochlear implants: A report. Journal of Speech, Language, and Hearing Research.
2346b	Telehealth delivery of the camperdown program for adults who stutter: a phase I trial.	O'Brian, S; Packman, A; Onslow, M	0	2008	0	1		O’Brian, S., Packman, A., & Onslow, M. (2008). Telehealth delivery of the Camperdown Program for adults who stutter: A phase I trial. Journal of Speech, Language, and Hearing Research.
2354b	Toward validation of a minimal competence phonetic core for African American children.	Stockman, IJ	0	2008	1	0		Stockman, I. J. (2008). Toward validation of a minimal competence phonetic core for African American children. Journal of Speech, Language, and Hearing Research.
2366b	Preschool teachers' fidelity in implementing a comprehensive language-rich curriculum.	Pence, KL; Justice, LM; Wiggins, AK	2	2008	0	1		Pence, K. L., Justice, L. M., & Wiggins, A. K. (2008). Preschool teachers' fidelity in implementing a comprehensive language-rich curriculum. Language, Speech, and Hearing Services in Schools.
2369b	Changes in speech production associated with alphabet supplementation.	Hustad, KC; Lee, J	0	2008	0	1		Hustad, K. C., & Lee, J. (2008). Changes in speech production associated with alphabet supplementation. Journal of Speech, Language, and Hearing Research.
2376b	Identifying language comprehension impairment in preschool children.	Skarakis-Doyle, E; Dempsey, L; Lee, C	2	2008	1	0		Skarakis-Doyle, E., Dempsey, L., & Lee, C. (2008). Identifying language comprehension impairment in preschool children. Language, Speech, and Hearing Services in Schools.
2389b	A randomized study of three interventions for aspiration of thin liquids in patients with dementia or Parkinson's disease.	Logemann, JA; Gensler, G; Robbins, J; Lindblad, AS; Brandt, D; Hind, JA; Kosek, S; Dikeman, K; Kazandjian, M; Gramigna, GD; Lundy, D; McGarvey-Toler, S; Miller, Gardner, PJ	0	2008	0	1		Logemann, J. A., Gensler, G., Robbins, J., Lindblad, A. S., Brandt, D., Hind, J. A., ... & Lundy, D. (2008). A randomized study of three interventions for aspiration of thin liquids in patients with dementia or Parkinson’s disease. Journal of Speech, Language, and Hearing Research.
2391b	Language intervention practices for school-age children with spoken language disorders: a systematic review.	Cirrin, FM; Gillam, RB	2	2008	0	1		Cirrin, F. M., & Gillam, R. B. (2008). Language intervention practices for school-age children with spoken language disorders: A systematic review. Language, Speech, and Hearing Services in Schools.
2392b	Evidence-based systematic review: effects of intensity of treatment and constraint-induced language therapy for individuals with stroke-induced aphasia.	Cherney, LR; Patterson, JP; Raymer, A; Frymark, T; Schooling, T	0	2008	0	1		Cherney, L. R., Patterson, J. P., Raymer, A., Frymark, T., & Schooling, T. (2008). Evidence-based systematic review: Effects of intensity of treatment and constraint-induced language therapy for individuals with stroke-induced aphasia. Journal of Speech, Language, and Hearing Research.
2397b	Vocal hygiene education, voice production therapy, and the role of patient adherence: a treatment effectiveness study in women with phonotrauma.	Behrman, A; Rutledge, J; Hembree, A; Sheridan, S	0	2008	0	1		Behrman, A., Rutledge, J., Hembree, A., & Sheridan, S. (2008). Vocal hygiene education, voice production therapy, and the role of patient adherence: a treatment effectiveness study in women with phonotrauma. Journal of Speech, Language, and Hearing Research.
2402b	Teaching a young child with autism to request assistance conditionally: a preliminary study.	Reichle, J; Dropik, PL; Alden-Anderson, E; Haley, T	1	2008	0	1		Reichle, J., Dropik, P. L., Alden-Anderson, E., & Haley, T. (2008). Teaching a young child with autism to request assistance conditionally: A preliminary study. American Journal of Speech-Language Pathology.
2406b	Using semantic feature analysis to improve contextual discourse in adults with aphasia.	Rider, JD; Wright, HH; Marshall, RC; Page, JL	1	2008	0	1		Rider, J. D., Wright, H. H., Marshall, R. C., & Page, J. L. (2008). Using semantic feature analysis to improve contextual discourse in adults with aphasia. American Journal of Speech-Language Pathology.
2408b	Semantic complexity in treatment of naming deficits in aphasia: evidence from well-defined categories.	Kiran S; Johnson L	1	2008	0	1		Kiran, S., & Johnson, L. (2008). Semantic complexity in treatment of naming deficits in aphasia: Evidence from well-defined categories. American Journal of Speech-Language Pathology.
2409b	A randomized trial of longitudinal effects of low-intensity responsivity education/prelinguistic milieu teaching.	Warren, SF; Fey, ME; Finestack, LH; Brady, NC; Bredin-Oja, SL; Fleming, KK	0	2008	0	1		Warren, S. F., Fey, M. E., Finestack, L. H., Brady, N. C., Bredin-Oja, S. L., & Fleming, K. K. (2008). A randomized trial of longitudinal effects of low-intensity responsivity education/prelinguistic milieu teaching. Journal of Speech, Language, and Hearing Research.
2412b	The communicative effectiveness survey: preliminary evidence of construct validity.	Donovan, NJ; Kendall, DL; Young, ME; Rosenbek, JC	1	2008	1	0		Donovan, N. J., Kendall, D. L., Young, M. E., & Rosenbek, J. C. (2008). The communicative effectiveness survey: preliminary evidence of construct validity. American Journal of Speech-Language Pathology.
2415b	Developing treatment for adolescents who stutter: a phase I trial of the Camperdown Program.	Hearne, A; Packman, A; Onslow, M; O'Brian, S	2	2008	0	1		Hearne, A., Packman, A., Onslow, M., & O’Brian, S. (2008). Developing treatment for adolescents who stutter: A Phase I trial of the Camperdown Program. Language, Speech, and Hearing Services in Schools.
2417b	Is parent--child interaction therapy effective in reducing stuttering?	Millard, SK; Nicholas, A; Cook, FM	0	2008	0	1		Millard, S. K., Nicholas, A., & Cook, F. M. (2008). Is parent–child interaction therapy effective in reducing stuttering?. Journal of Speech, Language, and Hearing Research.
2422b	Psychometric evaluation of condition-specific instruments used to assess health-related quality of life, attitudes, and related constructs in stuttering.	Franic, DM; Bothe, AK	1	2008	1	0		Franic, D. M., & Bothe, A. K. (2008). Psychometric evaluation of condition-specific instruments used to assess health-related quality of life, attitudes, and related constructs in stuttering. American Journal of Speech-Language Pathology.
2424b	A review of standardized tests of nonverbal oral and speech motor performance in children.	McCauley, RJ; Strand, EA	1	2008	1	0		McCauley, R. J., & Strand, E. A. (2008). A review of standardized tests of nonverbal oral and speech motor performance in children. American Journal of Speech-Language Pathology.
2425b	Effects of feedback frequency and timing on acquisition, retention, and transfer of speech skills in acquired apraxia of speech.	Austermann Hula, SN; Robin, DA; Maas ,E; Ballard, KJ; Schmidt, RA	0	2008	0	1		Hula, S. N. A., Robin, D. A., Maas, E., Ballard, K. J., & Schmidt, R. A. (2008). Effects of feedback frequency and timing on acquisition, retention, and transfer of speech skills in acquired apraxia of speech. Journal of Speech, Language, and Hearing Research.
2427b	Empirically derived combinations of tools and clinical cutoffs: an illustrative case with a sample of culturally/linguistically diverse children.	Oetting, JB; Cleveland, LH; Cope III, RF	2	2008	1	0		Oetting, J. B., Cleveland, L. H., & CopeIII, R. F. (2008). Empirically derived combinations of tools and clinical cutoffs: An illustrative case with a sample of culturally/linguistically diverse children. Language, Speech, and Hearing Services in Schools.
2443b	A Case Study Using a Multimodal Approach to Melodic Intonation Therapy	Slavin, Dianne; Fabus, Renee	1	2018	0	1		Slavin, D., & Fabus, R. (2018). A case study using a multimodal approach to Melodic Intonation Therapy. American journal of speech-language pathology, 27(4), 1352-1362.
2448b	Concatenation of the Moving Window Technique for Auditory-Perceptual Analysis of Voice Quality	Ehrlich, Benjamin; Lin, Liyu; Jiang, Jack	1	2018	1	0		Ehrlich, B., Lin, L., & Jiang, J. (2018). Concatenation of the Moving Window Technique for Auditory-Perceptual Analysis of Voice Quality. American journal of speech-language pathology, 27(4), 1426-1433.
2453b	An Integrative Analysis of Spontaneous Storytelling Discourse in Aphasia: Relationship With Listeners' Rating and Prediction of Severity and Fluency Status of Aphasia	Kong, Anthony Pak-Hin; Wong, Cherie Wan-Yin	1	2018	1	0		Kong, A. P. H., & Wong, C. W. Y. (2018). An Integrative Analysis of Spontaneous Storytelling Discourse in Aphasia: Relationship With Listeners' Rating and Prediction of Severity and Fluency Status of Aphasia. American journal of speech-language pathology, 27(4), 1491-1505.
2466b	Improving Polish Stuttering Attitudes: An Experimental Study of Teachers and University Students	Louis, Kenneth O. St; Wesierska, Katarzyna; Polewczyk, Irena	1	2018	0	1		St. Louis, K. O., Węsierska, K., & Polewczyk, I. (2018). Improving Polish stuttering attitudes: An experimental study of teachers and university students. American journal of speech-language pathology, 27(3S), 1195-1210.
2467b	Palin Parent-Child Interaction Therapy: The Bigger Picture	Millard, Sharon K.; Zebrowski, Patricia; Kelman, Elaine	1	2018	0	1		Millard, S. K., Zebrowski, P., & Kelman, E. (2018). Palin parent–child interaction therapy: The bigger picture. American journal of speech-language pathology, 27(3S), 1211-1223.
2468b	Behavior Assessment Battery: Normative and Psychometric Investigation Among Polish Adults Who Do and Do Not Stutter	Wesierska, Katarzyna; Vanryckeghem, Martine; Krawczyk, Aleksandra; Danielowska, Marta; Faściszewska, Maria; Tuchowska, Jadwiga	1	2018	1	0		Węsierska, K., Vanryckeghem, M., Krawczyk, A., Danielowska, M., Faściszewska, M., & Tuchowska, J. (2018). Behavior Assessment Battery: Normative and psychometric investigation among Polish adults who do and do not stutter. American journal of speech-language pathology, 27(3S), 1224-1234.
2472b	We Have a Voice: Exploring Participants' Experiences of Stuttering Modification Therapy	Everard, Rachel A.; Howell, Peter	1	2018	0	1		Everard, R. A., & Howell, P. (2018). We have a voice: Exploring participants' experiences of stuttering modification therapy. American journal of speech-language pathology, 27(3S), 1273-1286.
2481b	Articulatory Range of Movement in Individuals With Dysarthria Secondary to Amyotrophic Lateral Sclerosis	Lee, Jimin; Bell, Michael	1	2018	1	0		Lee, J., & Bell, M. (2018). Articulatory range of movement in individuals with dysarthria secondary to amyotrophic lateral sclerosis. American journal of speech-language pathology, 27(3), 996-1009.
2487b	Clinician vs. Machine: Estimating Vocalizations Rates in Young Children With Developmental Disorders	Bredin-Oja, Shelley L.; Fielding, Heather; Fleming, Kandace K.; Warren, Steven F.	1	2018	1	0		Bredin-Oja, S. L., Fielding, H., Fleming, K. K., & Warren, S. F. (2018). Clinician vs. Machine: Estimating Vocalizations Rates in Young Children With Developmental Disorders. American journal of speech-language pathology, 27(3), 1066-1072.
2488b	Naturalistic Speech-Generating Device Interventions for Children With Complex Communication Needs: A Systematic Review of Single-Subject Studies	Gevarter, Cindy; Zamora, Claudia	1	2018	0	1		Gevarter, C., & Zamora, C. (2018). Naturalistic speech-generating device interventions for children with complex communication needs: A systematic review of single-subject studies. American journal of speech-language pathology, 27(3), 1073-1090.
2496b	Language Assessment for Children With a Range of Neurodevelopmental Disorders Across Four Languages in South Africa	Romski, MaryAnn; Bornman, Juan; Sevcik, Rose A.; Tonsing, Kerstin; Barton-Hulsey, Andrea; Morwane, Refilwe; Whitmore, Ani; White, Robyn	1	2018	1	0		Romski, M., Bornman, J., Sevcik, R. A., Tönsing, K., Barton-Hulsey, A., Morwane, R., ... & White, R. (2018). Language assessment for children with a range of neurodevelopmental disorders across four languages in South Africa. American journal of speech-language pathology, 27(2), 602-615.
2498b	Eliciting the Language Sample for Developmental Sentence Scoring: A Comparison of Play With Toys and Elicited Picture Description	Eisenberg, Sarita L.; Guo, Ling-Yu; Mucchetti, Emily	1	2018	1	0		Eisenberg, S. L., Guo, L. Y., & Mucchetti, E. (2018). Eliciting the language sample for developmental sentence scoring: A comparison of play with toys and elicited picture description. American journal of speech-language pathology, 27(2), 633-646.
2502b	Two Grammatical Tasks for Screening Language Abilities in Spanish-Speaking Children	Benavides, Alejandra Auza; Kapantzoglou, Maria; Murata, Chiharu	1	2018	1	0		Auza Benavides, A., Kapantzoglou, M., & Murata, C. (2018). Two grammatical tasks for screening language abilities in Spanish-speaking children. American journal of speech-language pathology, 27(2), 690-705.
2507b	The Effects of Parent Training on Vocabulary Scores of Young Children With Hearing Loss	Lund, Emily	1	2018	0	1		Lund, E. (2018). The effects of parent training on vocabulary scores of young children with hearing loss. American Journal of Speech-Language Pathology, 27(2), 765-777.
2511b	Use of Textured Thin Liquids in Patients With Dysphagia	Howard, Melissa M.; Nissenson, Paul M.; Meeks, Lauren; Rosario, Emily R.	1	2018	0	1		Howard, M. M., Nissenson, P. M., Meeks, L., & Rosario, E. R. (2018). Use of textured thin liquids in patients with dysphagia. American journal of speech-language pathology, 27(2), 827-835.
2512b	Speech-Language Pathologist Interventions for Communication in Moderate-Severe Dementia: A Systematic Review	Swan, Katina; Hopper, Marie; Wenke, Rachel; Jackson, Claire; Till, Tracy; Conway, Erin	1	2018	0	1		Swan, K., Hopper, M., Wenke, R., Jackson, C., Till, T., & Conway, E. (2018). Speech-language pathologist interventions for communication in moderate–severe dementia: A systematic review. American Journal of Speech-Language Pathology, 27(2), 836-852.
2517b	Language Changes Following Combined Aphasia and Apraxia of Speech Treatment	Bunker, Lisa D.; Wright, Sandra; Wambaugh, Julie L.	1	2018	0	1		Bunker, L. D., Wright, S., & Wambaugh, J. L. (2018). Language Changes Following Combined Aphasia and Apraxia of Speech Treatment. American journal of speech-language pathology, 27(1S), 323-335.
2521b	Attentive Reading With Constrained Summarization Adapted to Address Written Discourse in People With Mild Aphasia	Obermeyer, Jessica A.; Edmonds, Lisa A.	1	2018	0	1		Obermeyer, J. A., & Edmonds, L. A. (2018). Attentive reading with constrained summarization adapted to address written discourse in people with mild aphasia. American journal of speech-language pathology, 27(1S), 392-405.
2524b	What Matters in Semantic Feature Analysis: Practice-Related Predictors of Treatment Response in Aphasia	Gravier, Michelle L.; Dickey, Michael W.; Hula, William D.; Evans, William S.; Owens, Rebecca L.; Winans-Mitrik, Ronda L.; Doyle, Patrick J.	1	2018	0	1		Gravier, M. L., Dickey, M. W., Hula, W. D., Evans, W. S., Owens, R. L., Winans-Mitrik, R. L., & Doyle, P. J. (2018). What matters in semantic feature analysis: Practice-related predictors of treatment response in aphasia. American Journal of Speech-Language Pathology, 27(1S), 438-453.
2525b	Exploring Treatment Fidelity in Persons With Aphasia Autonomously Practicing With Computerized Therapy Materials	Ball, Angel L.; Riesthal, Michael de; Steele, Richard D.	1	2018	0	1		Ball, A. L., de Riesthal, M., & Steele, R. D. (2018). Exploring treatment fidelity in persons with aphasia autonomously practicing with computerized therapy materials. American journal of speech-language pathology, 27(1S), 454-463.
2537b	Comparing Traditional Service Delivery and Telepractice for Speech Sound Production Using a Functional Outcome Measure	Coufal, Kathy; Parham, Douglas; Jakubowitz, Melissa; Howell, Cassandra; Reyes, Jared	1	2018	0	1		Coufal, K., Parham, D., Jakubowitz, M., Howell, C., & Reyes, J. (2018). Comparing traditional service delivery and telepractice for speech sound production using a functional outcome measure. American journal of speech-language pathology, 27(1), 82-90.
2539b	Novel Mealtime Duration Measures: Reliability and Preliminary Associations With Clinical Feeding and Swallowing Performance in Self-Feeding Children With Cerebral Palsy	Mishra, Avinash; Sheppard, Justine J.; Kantarcigil, Cagla; Gordon, Andrew M.; Malandraki, Georgia A.	1	2018	1			Mishra, A., Sheppard, J. J., Kantarcigil, C., Gordon, A. M., & Malandraki, G. A. (2018). Novel mealtime duration measures: Reliability and preliminary associations with clinical feeding and swallowing performance in self-feeding children with cerebral palsy. American journal of speech-language pathology, 27(1), 99-107.
2542b	Teaching Low-Income Spanish-Speaking Caregivers to Implement EMT en Espanol With Their Young Children With Language Impairment: A Pilot Study	Peredo, Tatiana Nogueira; Zelaya, Maria Isabel; Kaiser, Ann P.	1	2018	0	1		Peredo, T. N., Zelaya, M. I., & Kaiser, A. P. (2018). Teaching low-income Spanish-speaking caregivers to implement EMT en Español with their young children with language impairment: A pilot study. American journal of speech-language pathology, 27(1), 136-153.
2543b	The Effects of Intensive Speech Treatment on Conversational Intelligibility in Spanish Speakers With Parkinson's Disease	Moya-Gale, Gemma; Goudarzi, Alireza; Bayes, Angels; McAuliffe, Megan; Bulte, Bram; Levy, Erika S.	1	2018	0	1		Moya-Galé, G., Goudarzi, A., Bayés, À., McAuliffe, M., Bulté, B., & Levy, E. S. (2018). The effects of intensive speech treatment on conversational intelligibility in Spanish speakers with Parkinson's disease. American journal of speech-language pathology, 27(1), 154-165.
2546b	Effectiveness of a Method for Teaching Self-Compassion to Communication Sciences and Disorders Graduate Students	Beck, Ann R.; Verticchio, Heidi	1	2018	0	1		Beck, A. R., & Verticchio, H. (2018). Effectiveness of a method for teaching self-compassion to communication sciences and disorders graduate students. American journal of speech-language pathology, 27(1), 192-206.
2547b	Promoting Peer Interaction for Preschool Children With Complex Communication Needs and Autism Spectrum Disorder	Therrien, Michelle C. S.; Light, Janice C.	1	2018	0	1		Therrien, M. C., & Light, J. C. (2018). Promoting peer interaction for preschool children with complex communication needs and autism spectrum disorder. American Journal of Speech-Language Pathology, 27(1), 207-221.
2549b	Concurrent Validity and Reliability for the Communication Complexity Scale	Brady, Nancy C.; Fleming, Kandace; Romine, Rebecca Swinburne; Holbrook, Alison; Muller, Kristen; Kasari, Connie	1	2018	1	0		Brady, N. C., Fleming, K., Romine, R. S., Holbrook, A., Muller, K., & Kasari, C. (2018). Concurrent validity and reliability for the Communication Complexity Scale. American Journal of Speech-Language Pathology, 27(1), 237-246.
2553b	A Family-Centered Feeding Intervention to Promote Food Acceptance and Decrease Challenging Behaviors in Children With ASD: Report of Follow-Up Data on a Train-the-Trainer Model Using EAT-UP	Muldoon, Deirdre; Cosbey, Joanna	1	2018	0	1		Muldoon, D., & Cosbey, J. (2018). A family-centered feeding intervention to promote food acceptance and decrease challenging behaviors in children with ASD: Report of follow-up data on a train-the-trainer model using EAT-UP. American journal of speech-language pathology, 27(1), 278-287.
2554b	The Development of a Self-Efficacy Measurement Tool For Counseling in Speech-Language Pathology	Victorino, Kristen R.; Hinkle, Michelle S.	1	2018	1	0		Victorino, K. R., & Hinkle, M. S. (2019). The development of a self-efficacy measurement tool for counseling in speech-language pathology. American journal of speech-language pathology, 28(1), 108-120.
2555b	Application of the Communication Complexity Scale in Peer and Adult Assessment Contexts for Preschoolers With Autism Spectrum Disorders	Thiemann-Bourque, Kathy S.; Brady, Nancy; Hoffman, Lesa	1	2018	0	1		Thiemann-Bourque, K. S., Brady, N., & Hoffman, L. (2019). Application of the communication complexity scale in peer and adult assessment contexts for preschoolers with autism spectrum disorders. American journal of speech-language pathology, 28(1), 29-42.
2557b	Safety and Tolerability of Pharyngeal High-Resolution Manometry	Knigge, Molly A.; Marvin, Stevie; Thibeault, Susan L.	1	2018	1	0		Knigge, M. A., Marvin, S., & Thibeault, S. L. (2019). Safety and tolerability of pharyngeal high-resolution manometry. American journal of speech-language pathology, 28(1), 43-52.
2561b	The Intensive Cognitive-Communication Rehabilitation Program for Young Adults With Acquired Brain Injury	Gilmore, Natalie; Ross, Katrina; Kiran, Swathi	1	2018	0	1		Gilmore, N., Ross, K., & Kiran, S. (2019). The Intensive Cognitive-Communication Rehabilitation program for young adults with acquired brain injury. American journal of speech-language pathology, 28(1S), 341-358.
2562b	Short-Term Intensive Therapy and Outcomes for Athletes With Paradoxical Vocal Fold Motion Disorder	Gallena, Sally K.; Johnson, Arthur T.; Vossoughi, Jafar	1	2018	0	1		Gallena, S. K., Johnson, A. T., & Vossoughi, J. (2019). Short-Term Intensive Therapy and Outcomes for Athletes With Paradoxical Vocal Fold Motion Disorder. American journal of speech-language pathology, 28(1), 83-95.
2564b	Acquisition and Generalization Responses in Aphasia Naming Treatment: A Meta-Analysis of Semantic Feature Analysis Outcomes	Quique, Yina M.; Evans, William S.; Dickey, Michael Walsh	1	2018	0	1		Quique, Y. M., Evans, W. S., & Dickey, M. W. (2019). Acquisition and generalization responses in aphasia naming treatment: A meta-analysis of semantic feature analysis outcomes. American journal of speech-language pathology, 28(1S), 230-246.
2565b	Stealing Cookies in the Twenty-First Century: Measures of Spoken Narrative in Healthy Versus Speakers With Aphasia	Berube, Shauna; Nonnemacher, Jodi; Demsky, Cornelia; Glenn, Shenly; Saxena, Sadhvi; Wright, Amy; Tippett, Donna C.; Hillis, Argye E.	1	2018	1	0		Berube, S., Nonnemacher, J., Demsky, C., Glenn, S., Saxena, S., Wright, A., ... & Hillis, A. E. (2019). Stealing cookies in the twenty-first century: measures of spoken narrative in healthy versus speakers with aphasia. American journal of speech-language pathology, 28(1S), 321-329.
2568b	Effect Size Benchmarks for Response Elaboration Training: A Meta-Analysis	Bunker, Lisa D.; Nessler, Christina; Wambaugh, Julie L.	1	2018	0	1		Bunker, L. D., Nessler, C., & Wambaugh, J. L. (2019). Effect Size Benchmarks for Response Elaboration Training: A Meta-Analysis. American journal of speech-language pathology, 28(1S), 247-258.
2572b	Individualized Patient Vocal Priorities for Tailored Therapy	Titze, Ingo R.; Riede, Tobias; Palaparthi, Anil; Hynan, Linda S.; Hamilton, Amy; Toles, Laura; Mau, Ted	0	2018	1	0		Titze, I. R., Riede, T., Palaparthi, A., Hynan, L. S., Hamilton, A., Toles, L., & Mau, T. (2018). Individualized patient vocal priorities for tailored therapy. Journal of Speech, Language, and Hearing Research, 61(12), 2884-2894.
2576b	Modifying and Validating a Measure of Chronic Stress for People With Aphasia	Pompon, Rebecca Hunting; Amtmann, Dagmar; Bombardier, Charles; Kendall, Diane	0	2018	1	0		Hunting Pompon, R., Amtmann, D., Bombardier, C., & Kendall, D. (2018). Modifying and validating a measure of chronic stress for people with aphasia. Journal of Speech, Language, and Hearing Research, 61(12), 2934-2949.
2586b	Changing Developmental Trajectories of Toddlers With Autism Spectrum Disorder: Strategies for Bridging Research to Community Practice	Wetherby, Amy M.; Woods, Juliann; Guthrie, Whitney; Delehanty, Abigail; Brown, Jennifer A.; Morgan, Lindee; Holland, Renee D.; Schatschneider, Christopher; Lord, Catherine	0	2018	0	1		Wetherby, A. M., Woods, J., Guthrie, W., Delehanty, A., Brown, J. A., Morgan, L., ... & Lord, C. (2018). Changing developmental trajectories of toddlers with autism spectrum disorder: Strategies for bridging research to community practice. Journal of Speech, Language, and Hearing Research, 61(11), 2615-2628.
2592b	Treating Speech Movement Hypokinesia in Parkinson's Disease: Does Movement Size Matter?	Kearney, Elaine; Haworth, Brandon; Scholl, Jordan; Faloutsos, Petros; Baljko, Melanie; Yunusova, Yana	0	2018	0	1		Kearney, E., Haworth, B., Scholl, J., Faloutsos, P., Baljko, M., & Yunusova, Y. (2018). Treating Speech Movement Hypokinesia in Parkinson's Disease: Does Movement Size Matter?. Journal of Speech, Language, and Hearing Research, 61(11), 2703-2721.
2595b	Minimally Detectable Change and Minimal Clinically Important Difference of a Decline in Sentence Intelligibility and Speaking Rate for Individuals With Amyotrophic Lateral Sclerosis	Stipancic, Kaila L.; Yunusova, Yana; Berry, James D.; Green, Jordan R.	0	2018	1	0		Stipancic, K. L., Yunusova, Y., Berry, J. D., & Green, J. R. (2018). Minimally detectable change and minimal clinically important difference of a decline in sentence intelligibility and speaking rate for individuals with amyotrophic lateral sclerosis. Journal of Speech, Language, and Hearing Research, 61(11), 2757-2771.
2598b	The Mandarin Version of the Consensus Auditory-Perceptual Evaluation of Voice (CAPE-V) and Its Reliability	Chen, Zhen; Fang, Rui; Zhang, Yi; Ge, Pingjiang; Zhuang, Peiyun; Chou, Adriana; Jiang, Jack	0	2018	1	0		Chen, Z., Fang, R., Zhang, Y., Ge, P., Zhuang, P., Chou, A., & Jiang, J. (2018). The Mandarin version of the Consensus Auditory-Perceptual Evaluation of Voice (CAPE-V) and its reliability. Journal of Speech, Language, and Hearing Research, 61(10), 2451-2457.
2606b	Dynamic Assessment of Narratives Among Navajo Preschoolers	Henderson, Davis E.; Restrepo, Maria Adelaida; Aiken, Leona S.	0	2018	1	0		Henderson, D. E., Restrepo, M. A., & Aiken, L. S. (2018). Dynamic Assessment of Narratives Among Navajo Preschoolers. Journal of Speech, Language, and Hearing Research, 61(10), 2547-2560.
2611b	A Phonetic Complexity-Based Approach for Intelligibility and Articulatory Precision Testing: A Preliminary Study on Talkers With Amyotrophic Lateral Sclerosis	Kuruvilla-Dugdale, Mili; Custer, Claire; Heidrick, Lindsey; Barohn, Richard; Govindarajan, Raghav	0	2018	1	0		Kuruvilla-Dugdale, M., Custer, C., Heidrick, L., Barohn, R., & Govindarajan, R. (2018). A phonetic complexity-based approach for intelligibility and articulatory precision testing: A preliminary study on talkers with amyotrophic lateral sclerosis. Journal of Speech, Language, and Hearing Research, 61(9), 2205-2214.
2623b	The Impact of Exposure With No Training: Implications for Future Partner Training Research	Kagan, Aura; Simmons-Mackie, Nina; Victor, J. Charles	0	2018	0	1		Kagan, A., Simmons-Mackie, N., & Victor, J. C. (2018). The Impact of Exposure With No Training: Implications for Future Partner Training Research. Journal of Speech, Language, and Hearing Research, 61(9), 2347-2352.
2625b	Treatment for Residual Rhotic Errors With High- and Low-Frequency Ultrasound Visual Feedback: A Single-Case Experimental Design	Preston, Jonathan L.; McAllister, Tara; Phillips, Emily; Boyce, Suzanne; Tiede, Mark; Kim, Jackie S.; Whalen, Douglas H.	0	2018	0	1		Preston, J. L., McAllister, T., Phillips, E., Boyce, S., Tiede, M., Kim, J. S., & Whalen, D. H. (2018). Treatment for residual rhotic errors with high-and low-frequency ultrasound visual feedback: A single-case experimental design. Journal of Speech, Language, and Hearing Research, 61(8), 1875-1892.
2629b	The Effect of e-Book Vocabulary Instruction on Spanish-English Speaking Children	Wood, Carla; Fitton, Lisa; Petscher, Yaacov; Rodriguez, Estrella; Sunderman, Gretchen; Lim, Taehyeong	0	2018	0	1		Wood, C., Fitton, L., Petscher, Y., Rodriguez, E., Sunderman, G., & Lim, T. (2018). The effect of e-book vocabulary instruction on Spanish–English speaking children. Journal of Speech, Language, and Hearing Research, 61(8), 1945-1969.
2635b	Incorporating a Peer-Mediated Approach Into Speech-Generating Device Intervention: Effects on Communication of Preschoolers With Autism Spectrum Disorder	Thiemann-Bourque, Kathy; Feldmiller, Sarah; Hoffman, Lesa; Johner, Stacy	0	2018	0	1		Thiemann-Bourque, K., Feldmiller, S., Hoffman, L., & Johner, S. (2018). Incorporating a peer-mediated approach into speech-generating device intervention: Effects on communication of preschoolers with autism spectrum disorder. Journal of Speech, Language, and Hearing Research, 61(8), 2045-2061.
2636b	Evaluation of an Explicit Intervention to Teach Novel Grammatical Forms to Children With Developmental Language Disorder	Finestack, Lizbeth H.	0	2018	0	1		Finestack, L. H. (2018). Evaluation of an explicit intervention to teach novel grammatical forms to children with developmental language disorder. Journal of Speech, Language, and Hearing Research, 61(8), 2062-2075.
2647b	Treatment Response to a Double Administration of Constraint-Induced Language Therapy in Chronic Aphasia	Mozeiko, Jennifer; Myers, Emily B.; Coelho, Carl A.	0	2018	0	1		Mozeiko, J., Myers, E. B., & Coelho, C. A. (2018). Treatment response to a double administration of constraint-induced language therapy in chronic aphasia. Journal of Speech, Language, and Hearing Research, 61(7), 1664-1690.
2649b	The Roles of Retrieval Practice Versus Errorless Learning in Strengthening Lexical Access in Aphasia	Schuchard, Julia; Middleton, Erica L.	0	2018	0	1		Schuchard, J., & Middleton, E. L. (2018). The roles of retrieval practice versus errorless learning in strengthening lexical access in aphasia. Journal of Speech, Language, and Hearing Research, 61(7), 1700-1717.
2652b	Effects of Interventions That Include Aided Augmentative and Alternative Communication Input on the Communication of Individuals With Complex Communication Needs: A Meta-Analysis	O'Neill, Tara; Light, Janice; Pope, Lauramarie	0	2018	0	1		O'Neill, T., Light, J., & Pope, L. (2018). Effects of interventions that include aided augmentative and alternative communication input on the communication of individuals with complex communication needs: A meta-analysis. Journal of Speech, Language, and Hearing Research, 61(7), 1743-1765.
2670b	Kinematic Features of Jaw and Lips Distinguish Symptomatic From Presymptomatic Stages of Bulbar Decline in Amyotrophic Lateral Sclerosis	Bandini, Andrea; Green, Jordan R.; Wang, Jun; Campbell, Thomas F.; Zinman, Lorne; Yunusova, Yana	0	2018	1	0		Bandini, A., Green, J. R., Wang, J., Campbell, T. F., Zinman, L., & Yunusova, Y. (2018). Kinematic features of jaw and lips distinguish symptomatic from presymptomatic stages of bulbar decline in amyotrophic lateral sclerosis. Journal of Speech, Language, and Hearing Research, 61(5), 1118-1129.
2672b	Effects of a Tablet-Based Home Practice Program With Telepractice on Treatment Outcomes in Chronic Aphasia	Kurland, Jacquie; Liu, Anna; Stokes, Polly	0	2018	0	1		Kurland, J., Liu, A., & Stokes, P. (2018). Effects of a tablet-based home practice program with telepractice on treatment outcomes in chronic aphasia. Journal of Speech, Language, and Hearing Research, 61(5), 1140-1156.
2681b	A Systematic Review of Semantic Feature Analysis Therapy Studies for Aphasia	Efstratiadou, Evangelia Antonia; Papathanasiou, Ilias; Holland, Rachel; Archonti, Anastasia; Hilari, Katerina	0	2018	0	1		Efstratiadou, E. A., Papathanasiou, I., Holland, R., Archonti, A., & Hilari, K. (2018). A systematic review of semantic feature analysis therapy studies for aphasia. Journal of Speech, Language, and Hearing Research, 61(5), 1261-1278.
2686b	Comparison of Percentage of Syllables Stuttered With Parent-Reported Severity Ratings as a Primary Outcome Measure in Clinical Trials of Early Stuttering Treatment	Onslow, Mark; Jones, Mark; O'Brian, Sue; Packman, Ann; Menzies, Ross; Lowe, Robyn; Arnott, Simone; Bridgman, Kate; Sonneville, Caroline de; Franken, Marie-Christine	0	2018	1	0		Onslow, M., Jones, M., O'Brian, S., Packman, A., Menzies, R., Lowe, R., ... & Franken, M. C. (2018). Comparison of percentage of syllables stuttered with parent-reported severity ratings as a primary outcome measure in clinical trials of early stuttering treatment. Journal of Speech, Language, and Hearing Research, 61(4), 811-819.
2690b	Grammar in Boys With Idiopathic Autism Spectrum Disorder and Boys With Fragile X Syndrome Plus Autism Spectrum Disorder	Sterling, Audra	0	2018	1	0		Sterling, A. (2018). Grammar in boys with idiopathic autism spectrum disorder and boys with fragile X syndrome plus autism spectrum disorder. Journal of Speech, Language, and Hearing Research, 61(4), 857-869.
2693b	The Impact of Individual Differences on a Bilingual Vocabulary Approach for Latino Preschoolers	Mendez, Lucia I.; Crais, Elizabeth R.; Kainz, Kirsten	0	2018	0	1		Méndez, L. I., Crais, E. R., & Kainz, K. (2018). The impact of individual differences on a bilingual vocabulary approach for Latino preschoolers. Journal of Speech, Language, and Hearing Research, 61(4), 897-909.
2696b	Acoustic Predictors of Pediatric Dysarthria in Cerebral Palsy	Allison, Kristen M.; Hustad, Katherine C.	0	2018	1	0		Allison, K. M., & Hustad, K. C. (2018). Acoustic predictors of pediatric dysarthria in cerebral palsy. Journal of Speech, Language, and Hearing Research, 61(3), 462-478.
2699b	Deep Brain Stimulation of the Subthalamic Nucleus Parameter Optimization for Vowel Acoustics and Speech Intelligibility in Parkinson's Disease	Knowles, Thea; Adams, Scott; Abeyesekera, Anita; Mancinelli, Cynthia; Gilmore, Greydon; Jog, Mandar	0	2018	0	1		Knowles, T., Adams, S., Abeyesekera, A., Mancinelli, C., Gilmore, G., & Jog, M. (2018). Deep brain stimulation of the subthalamic nucleus parameter optimization for vowel acoustics and speech intelligibility in Parkinson's disease. Journal of Speech, Language, and Hearing Research, 61(3), 510-524.
2710b	What Does a Cue Do? Comparing Phonological and Semantic Cues for Picture Naming in Aphasia	Meteyard, Lotte; Bose, Arpita	0	2018	0	1		Meteyard, L., & Bose, A. (2018). What does a cue do? comparing phonological and semantic cues for picture naming in aphasia. Journal of Speech, Language, and Hearing Research, 61(3), 658-674.
2712b	Masked Repetition Priming Treatment for Anomia	Silkes, JoAnn P.	0	2018	0	1		Silkes, J. P. (2018). Masked repetition priming treatment for anomia. Journal of Speech, Language, and Hearing Research, 61(3), 690-712.
2713b	Targeting Complex Sentences in Older School Children With Specific Language Impairment: Results From an Early-Phase Treatment Study	Balthazar, Catherine H.; Scott, Cheryl M.	0	2018	0	1		Balthazar, C. H., & Scott, C. M. (2018). Targeting complex sentences in older school children with specific language impairment: Results from an early-phase treatment study. Journal of Speech, Language, and Hearing Research, 61(3), 713-728.
2721b	A Meta-Analysis: Acoustic Measurement of Roughness and Breathiness	Latoszek, Ben Barsties v; Maryn, Youri; Gerrits, Ellen; Bodt, Marc De	0	2018	1	0		v. Latoszek, B. B., Maryn, Y., Gerrits, E., & De Bodt, M. (2018). A meta-analysis: Acoustic measurement of roughness and breathiness. Journal of Speech, Language, and Hearing Research, 61(2), 298-323.
2725b	Manual Versus Automated Narrative Analysis of Agrammatic Production Patterns: The Northwestern Narrative Language Analysis and Computerized Language Analysis	Hsu, Chien-Ju; Thompson, Cynthia K.	0	2018	1	0		Hsu, C. J., & Thompson, C. K. (2018). Manual versus automated narrative analysis of agrammatic production patterns: The Northwestern narrative language analysis and computerized language analysis. Journal of Speech, Language, and Hearing Research, 61(2), 373-385.
2733b	Grammar Clinical Marker Yields Substantial Heritability for Language Impairments in 16-Year-Old Twins	Dale, Philip S.; Rice, Mabel L.; Rimfeld, Kaili; Hayiou-Thomas, Marianna E.	0	2018	1	0		Dale, P. S., Rice, M. L., Rimfeld, K., & Hayiou-Thomas, M. E. (2018). Grammar clinical marker yields substantial heritability for language impairments in 16-year-old twins. Journal of Speech, Language, and Hearing Research, 61(1), 66-78.
2735b	Predicting Response to Treatment in a Tier 2 Supplemental Vocabulary Intervention	Kelley, Elizabeth; Leary, Emily; Goldstein, Howard	0	2018	0	1		Kelley, E., Leary, E., & Goldstein, H. (2018). Predicting response to treatment in a Tier 2 supplemental vocabulary intervention. Journal of Speech, Language, and Hearing Research, 61(1), 94-103.
2736b	Accuracy of a Screening Tool for Early Identification of Language Impairment	Uilenburg, Noelle; Wiefferink, Karin; Verkerk, Paul; Denderen, Margot van; Schie, Carla van; Oudesluys-Murphy, Anne-Marie	0	2018	1	0		Uilenburg, N., Wiefferink, K., Verkerk, P., van Denderen, M., van Schie, C., & Oudesluys-Murphy, A. M. (2018). Accuracy of a screening tool for early identification of language impairment. Journal of Speech, Language, and Hearing Research, 61(1), 104-113.
2738b	Convergent and Divergent Validity of the Grammaticality and Utterance Length Instrument	Castilla-Earls, Anny; Fulcher-Rood, Katrina	0	2018	1	0		Castilla-Earls, A., & Fulcher-Rood, K. (2018). Convergent and Divergent Validity of the Grammaticality and Utterance Length Instrument. Journal of Speech, Language, and Hearing Research, 61(1), 120-129.
2741b	Parent-Implemented Communication Treatment for Infants and Toddlers With Hearing Loss: A Randomized Pilot Trial	Roberts, Megan Y.	0	2018	0	1		Roberts, M. Y. (2019). Parent-Implemented Communication Treatment for Infants and Toddlers With Hearing Loss: A Randomized Pilot Trial. Journal of Speech, Language, and Hearing Research, 62(1), 143-152.
2753b	Predicting Reading Problems 6 Years Into the Future: Dynamic Assessment Reduces Bias and Increases Classification Accuracy	Petersen, Douglas B.; Gragg, Shelbi L.; Spencer, Trina D.	2	2018	1	0		Petersen, D. B., Gragg, S. L., & Spencer, T. D. (2018). Predicting reading problems 6 years into the future: Dynamic assessment reduces bias and increases classification accuracy. Language, Speech, and Hearing Services in Schools, 49(4), 875-888.
2757b	Interactive Storybook Reading Instruction for Preschoolers Who Are Deaf and Hard of Hearing: A Multiple Probe Across Behaviors Analysis	Trussell, Jessica W.; Hasko, Janna; Kane, Joy; Amari, Brittany; Brusehaber, Alison	2	2018	0	1		Trussell, J. W., Hasko, J., Kane, J., Amari, B., & Brusehaber, A. (2018). Interactive Storybook Reading Instruction for Preschoolers Who Are Deaf and Hard of Hearing: A Multiple Probe Across Behaviors Analysis. Language, speech, and hearing services in schools, 49(4), 922-937.
2768b	Effects of a Complexity-Based Approach on Generalization of Past Tense -ed and Related Morphemes	Horne, Amanda J. Owen Van; Curran, Maura; Larson, Caroline; Fey, Marc E.	2	2018	0	1		Owen Van Horne, A. J., Curran, M., Larson, C., & Fey, M. E. (2018). Effects of a complexity-based approach on generalization of past tense–ed and related morphemes. Language, Speech, and Hearing Services in Schools, 49(3S), 681-693.
2788b	Treating Childhood Apraxia of Speech With the Kaufman Speech to Language Protocol: A Phase I Pilot Study	Gomez, Maryane; McCabe, Patricia; Jakielski, Kathy; Purcell, Alison	2	2018	0	1		Gomez, M., McCabe, P., Jakielski, K., & Purcell, A. (2018). Treating childhood apraxia of speech with the Kaufman speech to language protocol: A Phase I Pilot Study. Language, speech, and hearing services in schools, 49(3), 524-536.
2791b	Bridging Oral and Written Language: An Oral Narrative Language Intervention Study With Writing Outcomes	Spencer, Trina D.; Petersen, Douglas B.	2	2018	0	1		Spencer, T. D., & Petersen, D. B. (2018). Bridging oral and written language: An oral narrative language intervention study with writing outcomes. Language, speech, and hearing services in schools, 49(3), 569-581.
2804b	Classification Accuracy of Teacher Ratings When Screening Nonmainstream English-Speaking Kindergartners for Language Impairment in the Rural South	Gregory, Kyomi D.; Oetting, Janna B.	2	2018	1	0		Gregory, K. D., & Oetting, J. B. (2018). Classification accuracy of teacher ratings when screening nonmainstream English-speaking kindergartners for language impairment in the rural South. Language, speech, and hearing services in schools, 49(2), 218-231.
2806b	A Multiyear Population-Based Study of Kindergarten Language Screening Failure Rates Using the Rice Wexler Test of Early Grammatical Impairment	Weiler, Brian; Schuele, C. Melanie; Feldman, Jacob I.; Krimm, Hannah	2	2018	1	0		Weiler, B., Schuele, C. M., Feldman, J. I., & Krimm, H. (2018). A multiyear population-based study of kindergarten language screening failure rates using the Rice Wexler Test of Early Grammatical Impairment. Language, speech, and hearing services in schools, 49(2), 248-259.
2808b	Understanding Disorder Within Variation: Production of English Grammatical Forms by English Language Learners	Bedore, Lisa M.; Pena, Elizabeth D.; Anaya, Jissel B.; Nieto, Ricardo; Lugo-Neris, Mirza J.; Baron, Alisa	2	2018	1	0		Bedore, L. M., Peña, E. D., Anaya, J. B., Nieto, R., Lugo-Neris, M. J., & Baron, A. (2018). Understanding disorder within variation: Production of English grammatical forms by English language learners. Language, Speech, and Hearing Services in Schools, 49(2), 277-291.
2809b	Performance of Low-Income Dual Language Learners Attending English-Only Schools on the Clinical Evaluation of Language Fundamentals--Fourth Edition, Spanish	Barragan, Beatriz; Castilla-Earls, Anny; Martinez-Nieto, Lourdes; Restrepo, M. Adelaida; Gray, Shelley	2	2018	1	0		Barragan, B., Castilla-Earls, A., Martinez-Nieto, L., Restrepo, M. A., & Gray, S. (2018). Performance of low-income dual language learners attending English-only schools on the Clinical Evaluation of Language Fundamentals–Fourth Edition, Spanish. Language, Speech, and Hearing Services in Schools, 49(2), 292-305.
2811b	Effective Use of Auditory Bombardment as a Therapy Adjunct for Children With Developmental Language Disorders	Plante, Elena; Tucci, Alexander; Nicholas, Katrina; Arizmendi, Genesis D.; Vance, Rebecca	2	2018	0	1		Plante, E., Tucci, A., Nicholas, K., Arizmendi, G. D., & Vance, R. (2018). Effective use of auditory bombardment as a therapy adjunct for children with developmental language disorders. Language, Speech, and Hearing Services in Schools, 49(2), 320-333.
2819b	Exemplar Variability Facilitates Retention of Word Learning by Children With Specific Language Impairment	Aguilar, Jessica M.; Plante, Elena; Sandoval, Michelle	2	2018	0	1		Aguilar, J. M., Plante, E., & Sandoval, M. (2018). Exemplar variability facilitates retention of word learning by children with specific language impairment. Language, Speech, and Hearing Services in Schools, 49(1), 72-84.
2820b	Conceptual Scoring and Classification Accuracy of Vocabulary Testing in Bilingual Children	Anaya, Jissel B.; Pena, Elizabeth D.; Bedore, Lisa M.	2	2018	1	0		Anaya, J. B., Peña, E. D., & Bedore, L. M. (2018). Conceptual scoring and classification accuracy of vocabulary testing in bilingual children. Language, speech, and hearing services in schools, 49(1), 85-97.
2821b	Percent Grammatical Responses as a General Outcome Measure: Initial Validity	Eisenberg, Sarita L.; Guo, Ling-Yu	2	2018	1	0		Eisenberg, S. L., & Guo, L. Y. (2018). Percent grammatical responses as a general outcome measure: Initial validity. Language, speech, and hearing services in schools, 49(1), 98-107.
2823b	Diagnostic Accuracy of Traditional Measures of Phonological Ability for Bilingual Preschoolers and Kindergarteners	Fabiano-Smith, Leah; Hoffman, Katherine	2	2018	1	0		Fabiano-Smith, L., & Hoffman, K. (2018). Diagnostic accuracy of traditional measures of phonological ability for bilingual preschoolers and kindergarteners. Language, speech, and hearing services in schools, 49(1), 121-134.
2824b	Identifiers of Language Impairment for Spanish--English Dual Language Learners	Lazewnik, Rochel; Creaghead, Nancy A.; Smith, Allison Breit; Prendeville, Jo-Anne; Raisor-Becker, Lesley; Silbert, Noah	2	2018	1	0		Lazewnik, R., Creaghead, N. A., Smith, A. B., Prendeville, J. A., Raisor-Becker, L., & Silbert, N. (2019). Identifiers of Language Impairment for Spanish–English Dual Language Learners. Language, speech, and hearing services in schools, 50(1), 126-137.
2825b	Speech Intervention Outcomes Associated With Word Lexicality and Intervention Intensity	Cummings, Alycia; Hallgrimson, Janet; Robinson, Sarah	2	2018	0	1		Cummings, A., Hallgrimson, J., & Robinson, S. (2019). Speech intervention outcomes associated with word lexicality and intervention intensity. Language, speech, and hearing services in schools, 50(1), 83-98.
2826b	Sketch and Speak: An Expository Intervention Using Note-Taking and Oral Practice for Children With Language-Related Learning Disabilities	Ukrainetz, Teresa A.	2	2018	0	1		Ukrainetz, T. A. (2019). Sketch and Speak: An Expository Intervention Using Note-Taking and Oral Practice for Children With Language-Related Learning Disabilities. Language, speech, and hearing services in schools, 50(1), 53-70.
2827b	Screening Children's Speech: The Impact of Imitated Elicitation and Word Position	McLeod, Sharynne; Masso, Sarah	2	2018	1	0		McLeod, S., & Masso, S. (2019). Screening children's speech: The impact of imitated elicitation and word position. Language, speech, and hearing services in schools, 50(1), 71-82.
